# Supplementary material for: Systemic administration of β-glucan induces immune training in microglia
Source: J Neuroinflammation. 2021 Feb 22;18:57. doi: 10.1186/s12974-021-02103-4 (PMC7901224; doi:10.1186/s12974-021-02103-4)
Supplement: Supplementary file 4 — Additional file 4. Raw morphometric information for all cells analyzed in acute design, cortex and hippocampus regions. Statistical comparisons between experimental groups are also provided. [file 12974_2021_2103_MOESM4_ESM.xlsx]

## Sheet: acute_cortex
Raw morphometric information for all cells analyzed in acute design, cortex region
	cell_ID	treatment	soma area (µm2)	soma perimeter (µm)	branch area (µm2)	branch perimeter (µm)	convex area (µm2)	convex perimeter (µm)	startnodes (n)	junctions (n)	endnodes (n)	end-to-startnode ratio	total branch length (µm)	Sholl min radius (µm)	Sholl peak radius (µm)	Sholl max radius (µm)	Sholl peak (n)	branching index (µm)	cell spread (µm)	cell solidity	cell convexity	cell circularity	convex circularity	fractal dimension	lacunarity	groups
1	01_IC_0001-sil	PBS_3h	57	29	240	906	1861	177	5	77	60	12	420	4.086	8.172	35.412	15	576	19	0.159427	0.193172	0.00442731	0.743956	1.30144	3.15207	2
2	01_IC_0002-sil	PBS_3h	60	34	237	817	2348	197	4	63	54	13.5	382	4.994	9.988	44.946	13	640	20	0.126758	0.23485	0.00531278	0.759894	1.22848	5.50909	2
3	01_IC_0003-sil	PBS_3h	67	32	233	762	1682	167	5	65	65	13	370	4.086	14.074	34.05	12	618	18	0.178247	0.216344	0.00631718	0.757445	1.25576	3.32066	3
4	01_IC_0004-sil	PBS_3h	49	33	194	760	1345	147	7	48	49	7	323	2.724	16.344	30.872	17	433	18	0.180797	0.19104	0.00515419	0.781119	1.27605	3.05794	3
5	01_IC_0005-sil	PBS_3h	63	34	244	928	1878	182	10	84	62	6.2	440	3.632	9.08	44.038	14	939	21	0.163502	0.192167	0.00432159	0.715731	1.29085	4.48047	1
6	01_IC_0006-sil	PBS_3h	49	35	204	828	2293	194	6	63	55	9.167	368	3.632	23.154	39.044	16	651	20	0.110621	0.230357	0.00448018	0.76307	1.22599	4.74608	2
7	01_IC_0007-sil	PBS_3h	67	34	248	994	2231	202	9	78	69	7.667	447	4.086	15.89	46.308	17	772	21	0.14126	0.200137	0.00389427	0.688423	1.27208	4.41212	1
8	01_IC_0008-sil	PBS_3h	47	29	193	904	1794	173	7	56	54	7.714	370	3.178	14.982	43.13	19	816	18	0.133709	0.187991	0.00354185	0.749511	1.25171	3.35255	1
9	01_IC_0009-sil	PBS_3h	39	28	157	709	1562	173	7	45	45	6.429	297	2.27	19.068	39.952	11	617	20	0.124938	0.242388	0.00479295	0.652736	1.2683	6.04897	4
10	01_IC_0010-sil	PBS_3h	45	29	181	782	1860	175	4	48	50	12.5	329	4.086	13.62	42.676	14	566	20	0.121454	0.217599	0.0044141	0.767207	1.23506	3.75398	4
11	01_IC_0011-sil	PBS_3h	45	28	165	701	1497	155	5	37	41	8.2	294	4.54	16.798	32.688	12	527	18	0.140189	0.21537	0.00511894	0.787454	1.25169	4.0089	3
12	01_IC_0012-sil	PBS_3h	55	32	274	1146	2397	194	5	81	70	14	492	4.086	19.068	45.854	18	1127	23	0.137432	0.165634	0.00301322	0.79963	1.29744	4.04418	1
13	01_IC_0013-sil	PBS_3h	38	24	168	677	1674	165	5	38	37	7.4	289	3.632	15.89	44.038	11	439	20	0.122709	0.238361	0.00538767	0.772511	1.2066	4.07355	3
14	01_IC_0014-sil	PBS_3h	51	29	163	672	1299	153	8	52	48	6	294	3.632	20.884	28.602	15	609	19	0.164771	0.220617	0.00562555	0.701388	1.2717	3.61616	3
15	01_IC_0015-sil	PBS_3h	47	25	281	878	2204	198	8	67	58	7.25	432	3.632	11.35	38.136	15	576	19	0.148634	0.223621	0.00526432	0.708458	1.27147	4.05602	1
16	01_IC_0016-sil	PBS_3h	44	26	190	935	1691	160	9	65	61	6.778	381	3.178	14.982	29.056	14	507	17	0.138181	0.17111	0.00334802	0.827419	1.30351	3.70077	3
17	01_IC_0017-sil	PBS_3h	50	27	177	732	1419	148	5	68	54	10.8	340	3.632	12.712	30.418	16	489	17	0.160476	0.19752	0.0050837	0.8117	1.2611	2.96068	3
18	01_IC_0018-sil	PBS_3h	53	31	272	974	2191	189	7	79	66	9.429	456	3.178	12.712	39.498	14	703	21	0.148537	0.192167	0.00421145	0.768106	1.28363	3.91311	1
19	01_IC_0019-sil	PBS_3h	43	28	159	833	1288	143	7	46	52	7.429	318	2.724	13.62	27.694	17	416	14	0.156608	0.168137	0.0035022	0.791502	1.26085	3.02625	3
20	01_IC_0020-sil	PBS_3h	53	33	249	928	1761	161	6	61	55	9.167	406	3.178	19.976	31.78	18	463	18	0.171291	0.172599	0.00437004	0.856621	1.27269	2.76075	3
21	01_IC_0021-sil	PBS_3h	63	34	152	764	1510	160	8	41	47	5.875	303	3.632	16.798	33.142	18	549	16	0.142282	0.203515	0.00435242	0.738903	1.23819	4.16896	3
22	01_IC_0022-sil	PBS_3h	56	32	267	1218	2517	200	5	105	92	18.4	534	3.632	13.62	40.406	20	792	21	0.128586	0.161722	0.00264758	0.78726	1.27099	3.7437	1
23	01_IC_0023-sil	PBS_3h	53	29	195	964	2346	192	5	53	53	10.6	387	4.086	10.442	38.59	11	646	23	0.105379	0.195709	0.00321145	0.795656	1.24686	4.23015	2
24	01_IC_0024-sil	PBS_3h	54	31	210	962	1986	185	4	66	65	16.25	403	3.632	18.16	41.768	18	707	19	0.132903	0.186811	0.00340088	0.732859	1.2817	4.39754	2
25	01_IC_0025-sil	PBS_3h	60	31	235	832	2111	189	7	65	65	9.286	392	4.086	11.804	40.406	12	674	21	0.139753	0.222577	0.00512335	0.739974	1.25215	4.03941	2
26	02_IC_0041-sil	PBS_3h	58	33	203	812	1725	172	8	51	51	6.375	349	3.178	13.62	34.05	17	428	17	0.15111	0.210322	0.00489427	0.73207	1.22764	4.01109	3
27	02_IC_0042-sil	PBS_3h	53	31	152	740	2123	194	6	35	37	6.167	284	4.086	14.528	37.228	10	539	21	0.096533	0.255771	0.00449339	0.711709	1.17158	6.05108	4
28	02_IC_0043-sil	PBS_3h	50	30	111	545	1388	158	3	22	23	7.667	205	4.994	20.884	31.326	10	354	18	0.11596	0.280934	0.00637885	0.696855	1.18477	5.43265	4
29	02_IC_0044-sil	PBS_3h	73	36	284	1273	3269	231	7	75	75	10.714	526	3.632	17.252	43.584	17	832	24	0.10933	0.178396	0.0026696	0.767648	1.22597	5.21555	1
30	02_IC_0045-sil	PBS_3h	68	34	254	855	2242	199	5	70	64	12.8	404	4.54	13.62	39.498	14	735	22	0.143326	0.228626	0.00532599	0.710982	1.23942	5.23918	2
31	02_IC_0046-sil	PBS_3h	50	29	230	969	2605	205	4	57	58	14.5	411	3.632	18.614	38.136	15	679	22	0.107485	0.206489	0.00356388	0.777419	1.2263	4.3878	2
32	02_IC_0048-sil	PBS_3h	54	32	201	921	1953	180	6	59	52	8.667	376	3.632	21.792	34.958	16	537	18	0.130335	0.193048	0.0036696	0.755652	1.25845	4.0842	2
33	02_IC_0049-sil	PBS_3h	57	38	194	766	2050	197	6	43	47	7.833	327	3.178	9.988	44.038	13	732	22	0.122692	0.250286	0.00508811	0.661881	1.22137	4.74628	2
34	02_IC_0050-sil	PBS_3h	49	29	184	806	2189	188	4	48	45	11.25	338	3.632	11.804	37.682	12	502	19	0.10611	0.227022	0.00423789	0.774775	1.23087	5.1396	4
35	02_IC_0051-sil	PBS_3h	53	29	197	710	1629	161	6	35	38	6.333	302	3.632	11.35	31.326	13	327	17	0.15322	0.222467	0.00595595	0.785718	1.26459	3.76455	3
36	02_IC_0052-sil	PBS_3h	44	26	144	623	1739	170	4	39	36	9	261	3.632	17.252	34.958	10	371	20	0.107903	0.266432	0.00577533	0.754048	1.17407	5.17331	4
37	02_IC_0053-sil	PBS_3h	51	30	182	825	2230	198	4	51	47	11.75	335	3.632	13.166	40.86	12	796	23	0.104396	0.234454	0.00411454	0.716687	1.19435	5.7048	4
38	02_IC_0054-sil	PBS_3h	46	30	146	719	1701	163	5	46	47	9.4	289	3.178	10.896	29.51	13	361	17	0.112837	0.219674	0.00437004	0.802242	1.18351	3.98951	3
39	02_IC_0055-sil	PBS_3h	43	26	191	804	2056	190	6	44	45	7.5	331	3.632	8.172	38.59	11	399	20	0.114286	0.234423	0.00447137	0.712132	1.21305	5.19916	4
40	02_IC_0056-sil	PBS_3h	39	25	129	629	1524	155	5	27	24	4.8	244	3.632	17.252	32.234	11	279	18	0.110172	0.241965	0.00511013	0.792211	1.21159	4.35748	5
41	02_IC_0057-sil	PBS_3h	41	27	138	646	1837	176	5	28	32	6.4	253	3.178	14.528	39.044	10	358	19	0.0972335	0.266278	0.00511454	0.742185	1.19953	5.40383	4
42	02_IC_0058-sil	PBS_3h	58	34	132	641	1429	162	4	40	36	9	254	4.54	12.258	30.418	10	482	18	0.133084	0.241868	0.00532159	0.683639	1.21439	4.33231	3
43	02_IC_0059-sil	PBS_3h	56	30	186	784	1942	181	6	41	45	7.5	321	3.632	19.068	36.774	16	581	19	0.124599	0.22607	0.00476211	0.747639	1.20191	4.91608	3
44	02_IC_0060-sil	PBS_3h	66	34	206	846	1823	184	7	46	51	7.286	359	4.54	14.074	38.59	15	644	18	0.148855	0.212137	0.00452863	0.675912	1.24329	4.06225	2
45	02_IC_0061-sil	PBS_3h	40	25	162	560	1527	155	5	40	35	7	264	3.178	9.988	31.326	11	310	16	0.132251	0.270207	0.00773128	0.800819	1.22803	4.03679	5
46	02_IC_0062-sil	PBS_3h	49	26	238	977	2483	193	6	68	64	10.667	416	4.086	24.516	34.05	14	551	19	0.115313	0.195586	0.00368722	0.836057	1.23212	4.65885	2
47	02_IC_0063-sil	PBS_3h	56	30	202	919	2471	205	4	42	41	10.25	355	4.086	24.062	39.044	13	429	20	0.104229	0.219555	0.00369604	0.735868	1.21816	5.16587	4
48	02_IC_0064-sil	PBS_3h	55	30	203	998	2557	208	6	50	49	8.167	395	3.632	19.976	41.314	14	517	23	0.100925	0.205278	0.00314537	0.73993	1.21014	5.92904	2
49	02_IC_0065-sil	PBS_3h	58	29	152	767	1240	140	5	48	46	9.2	303	4.086	14.982	26.332	18	362	15	0.169238	0.178088	0.00427753	0.797022	1.28528	2.54229	3
50	02_IC_0066-sil	PBS_3h	58	31	154	750	1804	172	7	34	38	5.429	288	3.632	13.62	34.504	13	526	18	0.117824	0.224762	0.00456828	0.767559	1.20284	4.34894	3
51	03_IC_0083-sil	PBS_3h	50	29	235	810	1628	165	7	57	50	7.143	377	2.724	12.258	34.958	18	410	17	0.17507	0.199066	0.00523789	0.755308	1.27978	3.30867	3
52	03_IC_0084-sil	PBS_3h	67	35	224	915	1926	174	7	77	64	9.143	416	4.994	18.614	33.596	16	451	19	0.151295	0.186361	0.00418502	0.796198	1.25649	3.82533	2
53	03_IC_0085-sil	PBS_3h	51	31	220	817	2260	187	5	62	56	11.2	368	4.086	12.258	39.952	13	536	21	0.119555	0.224401	0.00488546	0.811789	1.21627	3.69388	2
54	03_IC_0086-sil	PBS_3h	51	28	191	626	1614	174	5	31	36	7.2	284	3.632	17.706	36.32	12	648	19	0.149573	0.272502	0.00744934	0.670687	1.23574	4.19936	3
55	03_IC_0087-sil	PBS_3h	45	26	131	551	1342	159	5	33	38	7.6	236	3.632	17.252	34.504	15	415	18	0.131172	0.28237	0.00698678	0.66807	1.22175	4.74143	3
56	03_IC_0088-sil	PBS_3h	68	32	181	806	1900	175	6	50	51	8.5	326	4.54	15.436	33.596	12	642	21	0.13096	0.21193	0.0045859	0.779339	1.22826	3.93858	3
57	03_IC_0089-sil	PBS_3h	60	34	160	685	1709	176	4	50	48	12	300	4.086	10.896	36.32	12	413	18	0.128665	0.248797	0.00552863	0.694009	1.25185	4.08504	2
58	03_IC_0090-sil	PBS_3h	44	28	121	646	1527	159	5	32	32	6.4	247	2.724	16.798	38.136	9	477	21	0.108119	0.241559	0.00478414	0.758048	1.19163	4.90607	4
59	03_IC_0091-sil	PBS_3h	53	30	248	738	1551	162	4	55	46	11.5	374	4.086	16.798	31.78	17	464	17	0.194238	0.216233	0.00673568	0.741885	1.28219	3.59548	3
60	03_IC_0092-sil	PBS_3h	57	30	217	972	2102	183	10	63	60	6	406	4.086	5.448	38.59	13	661	20	0.129916	0.187282	0.00361233	0.793075	1.24919	5.04389	3
61	03_IC_0093-sil	PBS_3h	56	29	494	1434	3759	237	6	134	112	18.667	737	4.086	16.798	50.394	21	1496	25	0.14641	0.165137	0.00335683	0.841018	1.29192	3.26692	1
62	03_IC_0094-sil	PBS_3h	60	32	310	1040	2399	196	6	93	84	14	510	4.54	21.338	43.13	16	1066	22	0.154167	0.18493	0.00413216	0.783564	1.2568	3.60017	1
63	03_IC_0095-sil	PBS_3h	64	31	272	1146	2802	213	9	82	80	8.889	507	4.086	19.068	40.406	20	843	21	0.119692	0.18274	0.00310573	0.776696	1.27185	3.72968	1
64	03_IC_0096-sil	PBS_3h	50	27	212	870	1984	178	7	43	46	6.571	357	3.632	14.982	35.866	12	551	18	0.132132	0.202837	0.00425991	0.783256	1.25535	3.92875	3
65	03_IC_0097-sil	PBS_3h	60	30	263	1010	1957	183	8	82	68	8.5	460	4.086	12.258	42.676	14	824	20	0.164793	0.178824	0.00388987	0.738238	1.28312	4.06874	1
66	03_IC_0098-sil	PBS_3h	48	27	158	584	1266	142	7	30	34	4.857	246	3.632	11.35	26.332	15	331	15	0.162991	0.241048	0.00746256	0.787762	1.23594	3.1586	5
67	03_IC_0099-sil	PBS_3h	55	28	193	918	2556	222	5	53	52	10.4	373	4.54	10.442	46.308	11	973	22	0.0971982	0.238062	0.00359912	0.652969	1.20586	6.82049	2
68	03_IC_0100-sil	PBS_3h	53	27	197	613	1713	165	7	41	44	6.286	293	3.632	10.896	32.234	13	380	18	0.146009	0.26896	0.00834802	0.790269	1.22778	3.43299	3
69	03_IC_0101-sil	PBS_3h	51	29	242	1098	2215	192	9	69	57	6.333	460	3.178	13.62	39.044	17	606	20	0.132383	0.173189	0.00300441	0.756577	1.26549	3.89593	1
70	03_IC_0102-sil	PBS_3h	35	24	180	680	1537	163	5	51	42	8.4	308	3.178	15.436	36.774	11	614	21	0.13941	0.238097	0.00571366	0.723172	1.2512	3.64754	3
71	03_IC_0103-sil	PBS_3h	54	31	262	1129	2455	205	5	92	74	14.8	509	3.632	9.534	36.32	18	523	20	0.12885	0.1797	0.00305727	0.73437	1.27567	4.63506	1
72	03_IC_0104-sil	PBS_3h	49	27	195	766	1817	176	5	42	42	8.4	320	4.086	23.154	40.86	13	589	20	0.134251	0.228344	0.005163	0.737612	1.23519	4.42712	4
73	03_IC_0105-sil	PBS_3h	65	33	158	748	1588	160	5	47	41	8.2	302	4.086	23.154	29.51	15	676	20	0.140837	0.206463	0.00470485	0.783564	1.24642	4.18116	3
74	03_IC_0106-sil	PBS_3h	48	28	196	1008	2101	183	4	52	54	13.5	395	4.086	25.878	41.768	15	660	19	0.116278	0.178106	0.00290308	0.786903	1.24382	4.48614	2
75	03_IC_0107-sil	PBS_3h	62	34	166	921	1803	182	8	48	48	6	350	3.632	13.166	43.584	14	458	21	0.126449	0.191947	0.00319383	0.685233	1.23919	4.79599	3
76	03_IC_0108-sil	PBS_3h	54	33	177	992	2205	195	6	42	42	7	368	4.086	17.252	37.682	14	455	23	0.104881	0.192507	0.002837	0.730463	1.23327	6.06385	2
77	03_IC_0109-sil	PBS_3h	55	31	242	1086	2355	199	8	47	49	6.125	426	3.632	23.154	47.216	19	732	25	0.126128	0.180709	0.00308811	0.750216	1.24247	4.48911	1
78	03_IC_0110-sil	PBS_3h	64	35	188	763	1729	176	8	56	52	6.5	344	4.086	14.528	39.498	17	556	20	0.146128	0.225947	0.00523789	0.701855	1.25359	4.06747	2
79	03_IC_0111-sil	PBS_3h	77	37	217	706	1927	181	8	44	50	6.25	325	4.54	13.62	36.774	13	603	21	0.152608	0.250705	0.0070793	0.737837	1.23016	4.34232	2
80	03_IC_0112-sil	PBS_3h	56	30	244	937	2235	192	6	71	69	11.5	422	4.086	14.982	36.32	16	732	20	0.134282	0.201956	0.00415859	0.7597	1.26391	4.52508	2
81	04_IC_0134-sil	LPS_3h	67	34	229	653	1912	189	6	45	46	7.667	308	3.632	15.89	44.038	14	625	21	0.155101	0.291507	0.008837	0.670471	1.21907	4.66347	2
82	04_IC_0135-sil	LPS_3h	56	33	249	966	2620	202	4	58	62	15.5	420	4.086	27.694	44.492	16	726	22	0.116639	0.204586	0.0039207	0.80296	1.22606	4.52564	2
83	04_IC_0136-sil	LPS_3h	60	38	254	843	1977	192	5	59	51	10.2	393	3.178	17.252	44.492	13	613	21	0.158991	0.221348	0.00527313	0.676943	1.25802	3.78271	2
84	04_IC_0137-sil	LPS_3h	43	25	208	851	2626	210	5	54	55	11	366	3.632	13.62	39.498	12	544	20	0.0956256	0.242894	0.00424229	0.751819	1.2193	6.29637	4
85	04_IC_0138-sil	LPS_3h	67	37	205	675	2014	176	6	47	47	7.833	315	4.994	23.608	34.504	17	814	21	0.135101	0.253855	0.00713656	0.819793	1.21531	3.67891	3
86	04_IC_0140-sil	LPS_3h	56	34	226	866	2576	212	11	61	60	5.455	382	3.178	6.81	45.854	13	846	21	0.109753	0.23967	0.00454185	0.720154	1.23439	4.58419	2
87	04_IC_0141-sil	LPS_3h	44	27	136	725	1377	156	6	42	37	6.167	274	3.178	14.074	32.688	14	357	18	0.130718	0.210511	0.00409692	0.70715	1.23276	5.19278	3
88	04_IC_0142-sil	LPS_3h	47	28	176	673	1454	170	5	53	53	10.6	306	3.178	15.436	36.774	12	514	19	0.153463	0.247031	0.0059207	0.632172	1.21209	3.53933	3
89	04_IC_0143-sil	LPS_3h	46	28	129	580	1310	152	5	38	41	8.2	247	3.632	9.08	38.136	13	362	17	0.133471	0.25552	0.00618502	0.709731	1.25805	3.95358	3
90	04_IC_0144-sil	LPS_3h	49	28	245	962	2656	202	8	68	71	8.875	436	3.632	20.884	41.314	14	991	22	0.110586	0.206176	0.00386344	0.821559	1.25476	5.00834	1
91	04_IC_0145-sil	LPS_3h	40	24	151	722	1838	170	4	32	34	8.5	274	4.086	17.706	29.056	12	325	18	0.104084	0.229705	0.0044141	0.803357	1.2344	4.83103	4
92	04_IC_0146-sil	LPS_3h	48	27	165	750	1882	185	6	46	45	7.5	304	3.632	9.534	41.768	10	415	20	0.113414	0.241247	0.0045859	0.694511	1.21422	5.4293	4
93	04_IC_0147-sil	LPS_3h	53	30	344	1186	2552	196	4	107	91	22.75	574	5.448	14.982	43.13	17	1199	24	0.155524	0.162952	0.00344934	0.835696	1.2834	3.42775	1
94	04_IC_0148-sil	LPS_3h	50	34	305	923	2922	222	4	81	67	16.75	462	3.178	19.522	44.492	16	670	22	0.121198	0.234445	0.00498238	0.748	1.26464	4.43176	2
95	04_IC_0151-sil	LPS_3h	58	32	204	883	2368	194	9	47	54	6	355	4.086	18.614	39.498	13	786	22	0.110599	0.216225	0.00410573	0.793749	1.20149	4.65306	2
96	04_IC_0152-sil	LPS_3h	39	24	171	578	1358	146	4	41	40	10	266	3.632	12.712	31.326	11	315	17	0.154687	0.247877	0.00763877	0.803775	1.24699	4.11706	5
97	04_IC_0153-sil	LPS_3h	41	23	219	748	1671	171	5	66	56	11.2	368	3.178	14.528	34.05	17	559	17	0.155529	0.225507	0.00565639	0.714952	1.26954	4.51926	2
98	04_IC_0154-sil	LPS_3h	67	37	151	654	1441	161	6	37	42	7	275	4.54	11.804	33.142	13	372	18	0.151339	0.239123	0.00604846	0.69889	1.22616	3.7579	3
99	04_IC_0156-sil	LPS_3h	47	31	161	736	1928	191	6	40	39	6.5	290	3.178	11.35	39.044	12	598	19	0.107758	0.253308	0.0045859	0.663233	1.1856	5.9097	4
100	04_IC_0157-sil	LPS_3h	61	34	248	845	2058	188	5	88	78	15.6	426	3.178	20.43	37.682	17	782	21	0.150291	0.219189	0.00529956	0.733885	1.26852	3.48679	1
101	04_IC_0158-sil	LPS_3h	43	24	247	765	2498	205	6	78	74	12.333	391	3.178	32.688	39.498	13	785	24	0.116079	0.266863	0.00618943	0.74885	1.23927	5.12575	2
102	04_IC_0159-sil	LPS_3h	66	36	198	747	2690	220	4	44	46	11.5	322	4.994	20.43	43.584	10	694	24	0.0978722	0.28441	0.00555507	0.701634	1.27168	6.72995	2
103	04_IC_0160-sil	LPS_3h	59	31	213	709	1911	179	5	53	52	10.4	332	4.54	19.522	37.682	12	649	20	0.14193	0.246322	0.00648018	0.752498	1.25944	4.28399	2
104	05_IC_0169-sil	LPS_3h	72	40	265	891	2332	199	4	79	65	16.25	430	4.086	15.436	36.774	17	846	23	0.144784	0.218736	0.00511013	0.737811	1.26213	4.05996	2
105	05_IC_0170-sil	LPS_3h	51	28	276	797	2395	207	7	63	61	8.714	393	3.178	17.706	41.314	12	903	25	0.136815	0.257907	0.00637445	0.700581	1.23976	4.77593	2
106	05_IC_0171-sil	LPS_3h	70	33	240	840	2103	182	7	68	67	9.571	398	3.632	25.878	37.228	15	704	22	0.147379	0.211026	0.00525991	0.801242	1.25272	3.77576	2
107	05_IC_0172-sil	LPS_3h	44	25	231	592	1519	155	5	51	44	8.8	318	3.632	15.89	32.688	13	497	18	0.1807	0.259273	0.00959031	0.789507	1.26555	3.47187	3
108	05_IC_0173-sil	LPS_3h	52	31	171	658	1657	165	4	40	43	10.75	292	4.086	15.89	31.78	15	416	18	0.134273	0.243643	0.0060793	0.762683	1.22567	4.57386	3
109	05_IC_0174-sil	LPS_3h	53	34	134	639	1678	161	5	30	31	6.2	254	4.086	10.442	30.872	11	331	19	0.111687	0.245004	0.00542731	0.809485	1.19635	5.68269	4
110	05_IC_0175-sil	LPS_3h	55	30	204	815	2335	199	7	56	53	7.571	358	3.178	19.976	45.854	12	940	23	0.110824	0.239956	0.00471366	0.738709	1.21497	4.6703	2
111	05_IC_0176-sil	LPS_3h	52	29	254	843	2153	203	6	69	63	10.5	396	4.086	20.884	50.848	13	951	23	0.142194	0.24026	0.00539207	0.656811	1.23556	5.87731	2
112	05_IC_0177-sil	LPS_3h	48	27	285	1022	2802	207	6	81	76	12.667	474	3.632	21.792	40.406	18	737	22	0.118855	0.199128	0.00388106	0.823238	1.23315	4.2085	1
113	05_IC_0178-sil	LPS_3h	72	34	222	710	2275	205	6	47	49	8.167	330	4.54	18.16	40.406	12	449	20	0.129432	0.282811	0.00701322	0.677476	1.22754	5.70308	2
114	05_IC_0180-sil	LPS_3h	51	29	281	822	2513	202	4	60	60	15	401	4.086	9.08	48.578	14	1193	23	0.132242	0.240683	0.0059163	0.772044	1.23547	3.97166	2
115	05_IC_0181-sil	LPS_3h	60	32	207	767	1806	172	5	48	50	10	342	5.448	21.338	39.498	14	597	21	0.147634	0.218608	0.00539207	0.764326	1.22786	3.77727	2
116	05_IC_0182-sil	LPS_3h	47	27	209	725	2006	182	5	59	56	11.2	336	3.632	10.896	38.59	12	481	19	0.127172	0.244128	0.00579295	0.764564	1.20357	4.86391	4
117	05_IC_0183-sil	LPS_3h	43	27	176	619	1335	154	5	55	50	10	307	2.724	13.62	34.958	13	340	18	0.163815	0.242066	0.00677533	0.705969	1.25323	3.67363	3
118	05_IC_0185-sil	LPS_3h	57	30	264	776	1910	177	4	58	59	14.75	375	3.632	13.166	48.124	14	869	22	0.167863	0.224361	0.00644934	0.763507	1.25651	3.66614	2
119	05_IC_0186-sil	LPS_3h	55	29	153	650	1715	167	5	29	30	6	260	3.632	19.522	36.32	11	429	20	0.121238	0.249661	0.00585022	0.773974	1.18183	4.58481	4
120	05_IC_0187-sil	LPS_3h	44	27	173	733	2068	189	6	31	37	6.167	291	3.632	15.436	47.67	9	651	25	0.105185	0.252423	0.00485903	0.725159	1.19579	5.49883	4
121	05_IC_0188-sil	LPS_3h	58	30	161	691	1618	173	5	45	48	9.6	303	3.632	19.068	34.05	15	626	19	0.135612	0.243744	0.0055022	0.682947	1.24632	4.25781	3
122	05_IC_0189-sil	LPS_3h	54	29	239	740	2273	196	6	59	64	10.667	369	3.632	7.718	38.59	11	745	21	0.129194	0.259013	0.00646696	0.746022	1.23614	4.87858	2
123	05_IC_0190-sil	LPS_3h	57	32	178	607	1539	158	5	49	48	9.6	288	3.632	15.89	34.504	13	453	19	0.152383	0.254485	0.0076652	0.776811	1.22705	3.30694	3
124	05_IC_0192-sil	LPS_3h	52	27	170	623	1725	170	6	44	43	7.167	280	3.632	9.08	29.51	10	327	18	0.128599	0.268678	0.00697797	0.751868	1.2332	4.30227	3
125	05_IC_0194-sil	LPS_3h	64	35	292	1090	3642	250	9	81	72	8	504	3.632	21.338	56.296	16	1342	29	0.0979736	0.225727	0.00365198	0.731308	1.22751	6.54531	1
126	06_IC_0215-sil	LPS_3h	55	31	192	734	1907	183	6	53	45	7.5	331	3.632	17.706	41.768	12	586	19	0.129687	0.243815	0.00548899	0.712273	1.25921	5.2502	2
127	06_IC_0217-sil	LPS_3h	41	25	153	696	1487	159	6	37	37	6.167	286	3.178	14.074	37.682	11	423	19	0.130705	0.223894	0.00486344	0.742432	1.25263	4.54822	3
128	06_IC_0218-sil	LPS_3h	51	27	223	883	1970	187	8	68	61	7.625	399	3.178	11.35	37.228	14	747	19	0.138678	0.211458	0.00440088	0.709441	1.24396	4.53942	1
129	06_IC_0220-sil	LPS_3h	59	31	332	1030	2840	224	7	94	84	12	508	3.632	18.16	48.124	16	1223	26	0.137718	0.218529	0.00468282	0.712286	1.26295	4.59811	1
130	06_IC_0221-sil	LPS_3h	58	30	255	824	2205	186	5	73	64	12.8	397	4.086	13.166	38.59	15	629	21	0.141881	0.222405	0.00563877	0.803722	1.2551	4.06533	2
131	06_IC_0222-sil	LPS_3h	60	31	257	970	2260	191	4	84	71	17.75	447	3.632	19.068	42.676	16	1051	21	0.140388	0.193573	0.0040793	0.77552	1.28074	3.76987	1
132	06_IC_0223-sil	LPS_3h	55	32	274	1039	2290	198	6	86	86	14.333	485	3.632	14.982	46.308	18	729	21	0.143608	0.188185	0.00372687	0.732634	1.26867	4.63508	1
133	06_IC_0224-sil	LPS_3h	64	31	204	829	1901	177	5	57	54	10.8	358	4.54	15.436	36.32	13	729	21	0.140965	0.212031	0.00484141	0.764035	1.24909	4.39466	2
134	06_IC_0225-sil	LPS_3h	62	32	194	969	2279	197	6	72	59	9.833	407	4.086	15.89	36.774	17	603	20	0.112097	0.199722	0.00329956	0.737546	1.21175	5.84121	2
135	06_IC_0226-sil	LPS_3h	46	26	225	804	1507	152	7	66	63	9	375	3.632	15.89	26.786	19	560	17	0.179352	0.186872	0.00514097	0.821097	1.29807	2.61805	3
136	06_IC_0227-sil	LPS_3h	48	27	166	591	1258	148	3	43	43	14.333	273	3.632	14.074	25.424	17	505	17	0.170018	0.245841	0.00746256	0.726172	1.25636	3.35027	3
137	06_IC_0228-sil	LPS_3h	51	28	162	656	1482	156	8	50	47	5.875	289	3.178	9.08	29.056	14	425	17	0.143317	0.232938	0.00596916	0.767819	1.24219	3.62859	3
138	06_IC_0230-sil	LPS_3h	53	32	186	735	1365	155	10	52	53	5.3	324	3.178	12.712	37.228	17	536	17	0.175225	0.207559	0.0054185	0.717683	1.29908	3.16422	3
139	06_IC_0232-sil	LPS_3h	45	26	254	773	1575	169	4	82	66	16.5	400	3.178	13.166	38.59	15	479	18	0.18989	0.214	0.00600441	0.690282	1.28501	3.46655	2
140	06_IC_0233-sil	LPS_3h	50	27	215	804	1643	166	6	68	70	11.667	368	3.632	14.982	34.504	16	612	18	0.161026	0.202828	0.00495595	0.747872	1.26823	3.36145	2
141	06_IC_0234-sil	LPS_3h	50	28	213	797	1974	178	10	56	57	5.7	353	3.178	21.338	34.958	14	546	19	0.133238	0.223075	0.00518062	0.781176	1.25869	4.54251	3
142	06_IC_0235-sil	LPS_3h	52	29	156	550	1282	149	6	35	38	6.333	245	2.724	15.89	31.78	13	223	15	0.161634	0.26337	0.00817181	0.728837	1.24124	3.13231	5
143	06_IC_0237-sil	LPS_3h	62	32	182	656	1757	165	8	60	57	7.125	317	3.632	9.534	34.504	14	671	18	0.138982	0.246445	0.00682819	0.808656	1.229	3.95763	3
144	06_IC_0238-sil	LPS_3h	66	33	265	898	2185	198	9	78	65	7.222	430	4.086	15.436	39.044	14	1088	20	0.151559	0.217097	0.00501762	0.702308	1.24141	4.2103	2
145	06_IC_0239-sil	LPS_3h	41	24	141	536	1093	135	5	31	34	6.8	230	3.178	9.08	29.51	12	253	15	0.16604	0.246172	0.00757269	0.752722	1.25151	3.61123	5
146	06_IC_0240-sil	LPS_3h	42	27	147	670	1582	157	5	49	48	9.6	281	3.632	24.062	29.51	15	515	18	0.119736	0.229925	0.0050837	0.803123	1.23831	3.89745	3
147	06_IC_0241-sil	LPS_3h	68	32	216	775	2117	185	4	72	65	16.25	359	4.994	18.16	39.044	14	704	21	0.134075	0.232656	0.00563877	0.777225	1.23197	3.76687	2
148	07_IC_0266-sil	LPS_1d	83	38	134	392	1111	135	7	45	39	5.571	208	4.994	14.074	29.964	11	373	15	0.195167	0.323881	0.0157225	0.767903	1.20732	3.47345	5
149	07_IC_0267-sil	LPS_1d	65	34	144	503	1351	155	8	44	46	5.75	234	3.178	7.264	30.872	10	421	17	0.154057	0.302709	0.00999559	0.70815	1.20163	4.35191	5
150	07_IC_0268-sil	LPS_1d	65	36	220	696	1930	185	7	68	69	9.857	348	4.086	6.81	38.59	11	924	20	0.14767	0.257982	0.00694714	0.706736	1.21263	3.90511	2
151	07_IC_0269-sil	LPS_1d	55	29	218	730	1683	167	5	60	59	11.8	349	4.086	13.62	30.418	15	410	17	0.161943	0.226044	0.00626872	0.757793	1.26611	3.66027	3
152	07_IC_0270-sil	LPS_1d	54	31	152	680	1788	186	6	58	50	8.333	293	3.178	17.706	34.504	12	439	21	0.115106	0.265436	0.0052467	0.647053	1.21425	6.18255	4
153	07_IC_0271-sil	LPS_1d	61	32	152	667	1656	158	11	37	40	3.636	278	4.086	16.798	27.694	12	374	17	0.12859	0.229423	0.00567401	0.838383	1.23193	4.33308	3
154	07_IC_0272-sil	LPS_1d	50	28	111	454	948	134	6	27	29	4.833	185	3.632	10.896	29.056	10	263	14	0.170317	0.288996	0.0094185	0.662026	1.18714	4.5478	5
155	07_IC_0273-sil	LPS_1d	66	32	136	463	1141	135	8	24	29	3.625	203	4.54	9.988	27.694	12	204	15	0.177639	0.285507	0.0113789	0.785696	1.21272	3.19315	5
156	07_IC_0274-sil	LPS_1d	62	32	131	440	1071	143	5	40	39	7.8	210	4.54	8.172	29.964	11	350	14	0.180352	0.308599	0.0113744	0.662344	1.20264	3.79533	5
157	07_IC_0275-sil	LPS_1d	55	29	278	676	1199	140	6	74	59	9.833	369	4.086	14.528	33.596	16	534	15	0.277458	0.212515	0.00959471	0.765714	1.30362	2.03689	6
158	07_IC_0276-sil	LPS_1d	49	28	199	642	1475	157	5	57	57	11.4	315	3.632	9.988	33.142	12	484	17	0.167859	0.240515	0.00731718	0.753511	1.28512	3.76673	3
159	07_IC_0277-sil	LPS_1d	58	33	132	556	1610	160	7	31	39	5.571	240	3.632	12.712	34.504	13	286	16	0.118009	0.276282	0.00707489	0.785485	1.17783	4.32446	5
160	07_IC_0278-sil	LPS_1d	53	30	124	587	1263	142	8	45	43	5.375	241	3.632	7.718	29.51	11	337	14	0.140123	0.236383	0.00617621	0.788612	1.20183	3.16276	5
161	07_IC_0279-sil	LPS_1d	66	36	186	710	1273	141	10	73	69	6.9	338	3.178	10.442	27.694	17	460	14	0.197352	0.196458	0.00612775	0.804767	1.30156	2.56122	6
162	07_IC_0281-sil	LPS_1d	55	30	142	623	1703	170	4	43	42	10.5	260	4.086	17.706	34.958	12	462	19	0.115586	0.264498	0.006	0.742075	1.17567	5.49024	4
163	07_IC_0283-sil	LPS_1d	47	27	186	674	2062	195	7	49	43	6.143	311	3.632	18.614	37.228	11	667	19	0.112956	0.285238	0.00627753	0.683075	1.22147	5.71675	4
164	07_IC_0286-sil	LPS_1d	53	30	206	648	1623	170	7	55	44	6.286	318	3.632	12.712	39.952	14	495	18	0.159141	0.256507	0.00738767	0.705463	1.25064	3.85663	3
165	07_IC_0287-sil	LPS_1d	67	33	146	538	1331	149	6	47	48	8	255	4.086	12.712	31.78	13	342	16	0.16015	0.265537	0.00846696	0.749749	1.23019	3.75239	3
166	07_IC_0288-sil	LPS_1d	91	42	279	876	1969	183	12	76	65	5.417	437	4.086	8.626	45.854	17	863	19	0.187996	0.205868	0.00587665	0.737467	1.29983	3.22017	1
167	07_IC_0289-sil	LPS_1d	44	26	269	740	2037	179	7	70	74	10.571	382	3.178	24.062	31.326	14	557	16	0.153674	0.244656	0.00732159	0.796106	1.25124	3.65191	2
168	07_IC_0290-sil	LPS_1d	66	38	117	454	1132	140	9	27	34	3.778	193	2.27	7.718	39.044	12	261	14	0.161189	0.294313	0.0101586	0.727709	1.18895	4.31576	5
169	07_IC_0291-sil	LPS_1d	60	34	136	494	828	121	10	44	37	3.7	234	2.724	11.804	25.424	14	272	14	0.236167	0.243802	0.0100529	0.716159	1.2489	2.11334	5
170	07_IC_0292-sil	LPS_1d	58	30	159	703	1333	158	10	46	53	5.3	296	3.632	11.804	34.504	12	627	17	0.162581	0.222295	0.00539207	0.671101	1.24789	3.6545	3
171	07_IC_0293-sil	LPS_1d	54	31	115	407	863	123	6	30	32	5.333	185	3.178	5.448	27.24	10	163	13	0.196203	0.296542	0.0124581	0.721965	1.21675	3.44867	5
172	08_IC_0328-sil	LPS_1d	63	32	390	1218	2513	209	9	139	114	12.667	639	4.086	11.35	42.222	20	839	20	0.180211	0.170216	0.00378855	0.725674	1.33822	3.70459	1
173	08_IC_0329-sil	LPS_1d	71	35	430	1456	3274	225	10	141	119	11.9	722	3.632	17.252	39.952	22	1240	23	0.153075	0.152476	0.00288546	0.811282	1.31495	4.06732	1
174	08_IC_0330-sil	LPS_1d	61	31	327	904	2042	185	8	70	66	8.25	453	4.086	18.16	38.59	16	596	20	0.190115	0.204119	0.00596916	0.753427	1.28586	3.12956	1
175	08_IC_0331-sil	LPS_1d	57	30	245	683	1654	165	8	65	55	6.875	352	3.632	14.528	31.78	16	446	18	0.182626	0.238097	0.00794714	0.767524	1.24717	2.53385	3
176	08_IC_0332-sil	LPS_1d	60	33	232	750	1657	162	7	68	58	8.286	367	3.632	8.626	30.418	18	460	16	0.175912	0.214758	0.00644934	0.795062	1.27318	3.09268	3
177	08_IC_0333-sil	LPS_1d	65	35	183	592	1135	141	7	38	39	5.571	272	3.178	9.988	38.136	13	469	16	0.218692	0.230885	0.00842291	0.722542	1.25985	2.28568	6
178	08_IC_0334-sil	LPS_1d	47	28	173	679	1325	149	6	51	47	7.833	305	3.178	14.982	32.688	14	473	17	0.165921	0.216189	0.00580617	0.748511	1.25964	3.08379	3
179	08_IC_0335-sil	LPS_1d	83	39	377	1142	2708	218	7	96	91	13	566	4.994	25.424	40.86	17	1047	23	0.169943	0.188445	0.0043348	0.717996	1.28937	4.29747	1
180	08_IC_0336-sil	LPS_1d	61	31	180	575	1388	161	10	39	46	4.6	268	4.086	12.258	35.412	15	290	15	0.173758	0.275379	0.00889427	0.675066	1.22864	3.71821	5
181	08_IC_0337-sil	LPS_1d	57	30	143	553	1518	170	6	26	33	5.5	223	4.086	14.528	35.866	12	329	17	0.131251	0.303485	0.00797797	0.659969	1.18445	5.5294	5
182	08_IC_0339-sil	LPS_1d	60	35	322	811	2342	197	7	71	62	8.857	430	3.178	14.528	39.498	12	682	23	0.163101	0.240586	0.00714097	0.756317	1.25949	4.136	2
183	08_IC_0340-sil	LPS_1d	49	26	249	774	1841	178	6	66	57	9.5	381	3.632	12.712	39.044	15	786	18	0.162044	0.227722	0.0061674	0.734123	1.23288	3.59482	2
184	08_IC_0356-sil	LPS_1d	77	35	215	576	1845	185	5	34	35	7	275	4.994	16.344	39.952	11	531	20	0.158282	0.316648	0.0107225	0.675692	1.1962	4.53564	2
185	09_IC_0378-sil	LPS_1d	74	37	234	560	1353	149	9	48	47	5.222	295	3.178	17.252	31.326	14	449	16	0.227978	0.266291	0.0123172	0.761824	1.26361	2.61537	6
186	09_IC_0379-sil	LPS_1d	48	26	214	631	1585	162	7	49	52	7.429	308	3.632	9.08	34.05	11	336	17	0.165079	0.256916	0.00824229	0.756282	1.24575	2.71333	3
187	09_IC_0380-sil	LPS_1d	45	27	302	861	2375	199	4	71	67	16.75	432	3.632	13.166	38.136	18	661	20	0.146154	0.228996	0.00579736	0.756352	1.24482	3.31299	2
188	09_IC_0381-sil	LPS_1d	40	24	275	812	2172	192	4	79	67	16.75	417	3.632	11.35	37.228	14	691	19	0.145445	0.2343	0.00589427	0.73826	1.26651	4.70357	2
189	09_IC_0383-sil	LPS_1d	86	41	302	935	1696	171	9	109	77	8.556	475	3.632	15.436	36.774	22	749	18	0.228463	0.183009	0.00556388	0.72737	1.29887	2.76219	1
190	09_IC_0385-sil	LPS_1d	58	29	218	703	1584	171	6	69	48	8	340	4.086	8.626	44.492	15	718	18	0.173837	0.242198	0.00694714	0.681189	1.2771	3.96861	2
191	09_IC_0386-sil	LPS_1d	49	29	218	583	1907	178	5	44	42	8.4	295	4.086	14.982	32.688	12	421	18	0.139846	0.304062	0.00973568	0.75285	1.21347	3.91347	3
192	09_IC_0387-sil	LPS_1d	65	32	340	894	2150	191	6	93	73	12.167	471	4.086	14.982	41.314	19	666	19	0.188282	0.213978	0.00637445	0.739573	1.30323	3.51972	1
193	09_IC_0388-sil	LPS_1d	63	30	223	687	2076	178	8	56	60	7.5	333	4.54	19.068	33.596	15	696	17	0.13796	0.256722	0.00751101	0.825899	1.21028	4.29261	3
194	09_IC_0389-sil	LPS_1d	44	26	196	692	1925	177	7	56	62	8.857	318	3.178	22.7	40.406	10	490	19	0.124696	0.256335	0.00633921	0.773709	1.18933	4.94864	4
195	09_IC_0390-sil	LPS_1d	42	25	171	519	1197	141	5	34	32	6.4	243	3.632	7.264	26.786	12	250	15	0.178291	0.267269	0.0095815	0.752176	1.23856	3.24948	5
196	09_IC_0391-sil	LPS_1d	51	27	259	793	1707	165	10	88	71	7.1	418	3.178	15.89	32.234	17	568	18	0.181419	0.208216	0.00622907	0.792009	1.28612	3.256	3
197	09_IC_0392-sil	LPS_1d	51	27	290	964	2172	198	8	85	76	9.5	457	3.632	7.718	45.854	14	684	18	0.157101	0.206881	0.00468282	0.696502	1.25785	3.84974	1
198	09_IC_0393-sil	LPS_1d	57	30	323	1031	2299	193	7	115	99	14.143	530	4.086	10.442	35.412	16	751	20	0.165304	0.186132	0.00443612	0.774264	1.29667	3.06292	1
199	09_IC_0394-sil	LPS_1d	55	29	217	702	2132	188	5	60	57	11.4	338	4.54	23.154	33.596	13	625	19	0.127709	0.263912	0.00671366	0.754877	1.23385	5.00398	2
200	09_IC_0395-sil	LPS_1d	45	26	211	631	1472	153	7	53	52	7.429	303	3.178	15.436	28.602	13	385	17	0.17396	0.243242	0.00810573	0.787643	1.23444	2.55742	3
201	09_IC_0396-sil	LPS_1d	53	30	204	909	2262	188	8	50	48	6	366	3.632	11.35	34.958	13	523	18	0.113793	0.205211	0.00386344	0.80652	1.23536	4.50612	3
202	09_IC_0397-sil	LPS_1d	76	37	248	691	1310	145	8	71	58	7.25	356	3.632	14.074	27.694	20	432	16	0.246784	0.212907	0.00872247	0.779722	1.30569	2.53937	6
203	09_IC_0400-sil	LPS_1d	61	32	250	739	1840	175	8	70	67	8.375	377	3.632	8.626	43.584	15	696	18	0.168969	0.231511	0.00685463	0.757013	1.24397	3.16234	1
204	09_IC_0401-sil	LPS_1d	62	31	218	718	1546	156	8	57	60	7.5	339	4.086	16.798	28.148	19	520	17	0.181304	0.216599	0.0067533	0.794106	1.25316	3.33015	3
205	09_IC_0402-sil	LPS_1d	69	33	322	902	2039	182	9	96	83	9.222	481	4.54	14.528	38.136	20	916	20	0.191749	0.202529	0.00609692	0.775075	1.28349	2.75149	1
206	09_IC_0403-sil	LPS_1d	48	26	329	816	2260	187	7	71	71	10.143	436	3.632	14.074	36.774	17	574	19	0.166744	0.232639	0.00732599	0.811718	1.26779	2.99784	2
207	09_IC_0404-sil	LPS_1d	37	23	198	566	1136	139	7	47	45	6.429	276	2.724	9.988	29.964	15	337	15	0.206731	0.246185	0.00923789	0.737154	1.26633	2.44479	5
208	09_IC_0405-sil	LPS_1d	49	26	205	589	1323	147	6	53	48	8	298	3.632	14.074	26.786	18	380	15	0.191643	0.246097	0.00897357	0.773225	1.23361	2.93607	5
209	09_IC_0406-sil	LPS_1d	52	29	345	939	2086	186	6	79	71	11.833	476	3.632	15.89	37.682	18	733	20	0.190344	0.197595	0.00560793	0.754868	1.28919	3.20342	1
210	09_IC_0407-sil	LPS_1d	54	28	249	711	1580	156	7	64	62	8.857	366	4.086	20.43	33.596	14	558	18	0.1917	0.223048	0.00774009	0.811524	1.2493	2.4917	3
211	10_IC_0427-sil	LPS_2d	115	43	202	574	1238	142	12	55	55	4.583	292	4.994	9.08	26.332	17	417	15	0.256441	0.243485	0.0117181	0.77067	1.25346	2.29469	6
212	10_IC_0428-sil	LPS_2d	91	37	180	565	1315	146	9	50	52	5.778	278	5.448	11.35	29.056	14	505	16	0.206471	0.25585	0.0104229	0.771123	1.2435	3.12803	6
213	10_IC_0429-sil	LPS_2d	68	33	328	1045	1669	169	8	120	87	10.875	533	3.632	9.988	37.228	18	674	19	0.237238	0.162013	0.00459031	0.73748	1.31774	2.1833	1
214	10_IC_0430-sil	LPS_2d	64	31	265	750	1736	165	8	85	84	10.5	404	4.086	22.246	31.326	14	656	17	0.189511	0.219674	0.00730396	0.798749	1.25345	3.45254	3
215	10_IC_0431-sil	LPS_2d	58	30	197	689	1590	165	9	59	63	7	321	3.178	8.626	33.142	14	417	15	0.16037	0.236652	0.00659031	0.733731	1.24336	4.22731	3
216	10_IC_0432-sil	LPS_2d	63	32	164	598	1201	159	10	40	44	4.4	267	4.086	12.258	34.504	15	461	17	0.189432	0.26011	0.00763877	0.596145	1.24399	3.34292	5
217	10_IC_0433-sil	LPS_2d	72	32	173	648	1374	151	7	46	43	6.143	284	4.54	16.798	29.51	14	411	17	0.178656	0.230317	0.00713656	0.75304	1.24465	3.77506	3
218	10_IC_0434-sil	LPS_2d	71	33	198	656	1581	174	4	52	42	10.5	316	4.086	17.706	39.498	16	460	19	0.169996	0.256617	0.00735683	0.657128	1.26011	4.32835	2
219	10_IC_0435-sil	LPS_2d	82	38	185	644	1373	156	11	47	52	4.727	295	3.632	12.258	35.866	13	291	16	0.194493	0.242489	0.00814097	0.711744	1.23559	3.20975	6
220	10_IC_0436-sil	LPS_2d	68	32	246	727	1822	169	9	66	67	7.444	362	4.086	9.08	30.418	16	670	18	0.172811	0.229419	0.00729956	0.802674	1.25089	2.69585	3
221	10_IC_0437-sil	LPS_2d	63	31	188	744	1647	161	6	59	64	10.667	334	4.54	12.712	32.688	15	644	18	0.152529	0.216489	0.00570925	0.798833	1.23902	3.23099	3
222	10_IC_0438-sil	LPS_2d	58	30	228	830	1707	166	8	74	68	8.5	398	3.178	14.982	39.952	14	625	18	0.167652	0.198696	0.00514537	0.77707	1.24126	3.81781	3
223	10_IC_0439-sil	LPS_2d	64	31	223	687	1114	133	10	66	59	5.9	333	3.632	5.448	29.056	15	442	15	0.257405	0.194295	0.00768722	0.790877	1.30909	2.41437	6
224	10_IC_0440-sil	LPS_2d	90	38	236	804	1552	158	10	91	71	7.1	400	4.54	15.436	33.596	17	531	17	0.209872	0.19541	0.00622907	0.777088	1.26867	2.53609	1
225	10_IC_0441-sil	LPS_2d	85	42	281	784	1702	172	10	97	85	8.5	434	2.724	22.246	37.682	18	854	20	0.215031	0.217903	0.00739648	0.724269	1.29719	2.72669	1
226	10_IC_0442-sil	LPS_2d	68	35	366	1166	2559	201	6	113	93	15.5	584	4.994	14.982	44.038	21	934	22	0.169727	0.170586	0.00393392	0.796894	1.28383	2.9803	1
227	10_IC_0443-sil	LPS_2d	61	33	218	603	1524	154	8	54	57	7.125	308	3.178	13.62	30.872	13	452	17	0.18359	0.250833	0.00936564	0.810938	1.22466	3.45981	3
228	10_IC_0444-sil	LPS_2d	72	32	337	962	1947	173	13	109	88	6.769	512	4.54	7.264	39.498	16	735	19	0.20993	0.180612	0.00559912	0.817943	1.32674	2.21139	1
229	10_IC_0445-sil	LPS_2d	59	31	254	982	2380	195	7	67	69	9.857	438	4.086	20.43	37.682	15	730	20	0.131502	0.195229	0.00394273	0.786498	1.2527	3.98422	2
230	10_IC_0447-sil	LPS_2d	89	37	239	814	2336	196	10	82	70	7	397	4.54	17.252	39.044	13	411	18	0.140401	0.239123	0.00614097	0.765048	1.2331	4.43521	2
231	10_IC_0448-sil	LPS_2d	73	34	232	845	2078	178	8	67	55	6.875	396	4.086	14.982	35.866	16	599	19	0.146515	0.206	0.00514097	0.826634	1.26654	3.84432	2
232	10_IC_0449-sil	LPS_2d	91	42	333	997	2419	207	10	113	96	9.6	515	3.632	14.528	42.222	17	891	20	0.17515	0.207405	0.0053348	0.707758	1.28092	4.30489	1
233	10_IC_0450-sil	LPS_2d	51	28	210	761	1602	158	6	59	55	9.167	353	3.178	16.798	32.234	16	417	17	0.162515	0.202744	0.0054185	0.811066	1.27244	3.00449	3
234	10_IC_0451-sil	LPS_2d	61	31	217	600	1453	152	9	61	58	6.444	318	3.632	15.436	34.05	15	433	17	0.191004	0.249718	0.00945815	0.79396	1.24657	2.77165	3
235	10_IC_0452-sil	LPS_2d	58	31	194	573	1307	147	7	45	43	6.143	280	3.178	11.804	29.964	11	399	16	0.193242	0.252533	0.00935242	0.758855	1.25833	2.78544	5
236	10_IC_0453-sil	LPS_2d	59	30	225	880	1763	176	9	86	82	9.111	415	3.632	9.534	36.774	16	678	17	0.161273	0.200414	0.00464758	0.717577	1.27148	3.27467	1
237	10_IC_0454-sil	LPS_2d	63	32	215	772	1886	170	7	44	47	6.714	345	3.632	17.706	32.234	17	532	19	0.147485	0.217405	0.00574449	0.824097	1.21834	3.57672	3
238	10_IC_0455-sil	LPS_2d	83	36	227	526	880	127	10	62	45	4.5	300	4.086	9.988	26.332	19	269	14	0.352278	0.247339	0.0148458	0.68889	1.32648	1.85716	6
239	10_IC_0456-sil	LPS_2d	75	35	332	627	1173	136	9	82	61	6.778	383	3.632	12.258	25.878	22	348	15	0.347581	0.223176	0.0138018	0.797233	1.31419	1.73906	6
240	11_IC_0474-sil	LPS_2d	51	27	260	725	1404	155	6	78	66	11	383	3.632	14.528	29.056	20	431	16	0.221604	0.212414	0.00738326	0.738304	1.30873	2.479	6
241	11_IC_0476-sil	LPS_2d	65	34	399	883	1853	172	10	110	89	8.9	516	3.178	12.258	34.05	17	691	18	0.250106	0.199423	0.00780176	0.784348	1.31835	2.42361	1
242	11_IC_0478-sil	LPS_2d	74	36	237	645	1552	165	11	62	49	4.455	330	3.632	6.356	33.142	18	549	17	0.200366	0.265062	0.0101101	0.71811	1.24609	3.79707	6
243	11_IC_0479-sil	LPS_2d	87	38	371	900	1793	172	11	115	85	7.727	526	4.086	13.62	33.596	23	575	17	0.255498	0.192736	0.00720264	0.759004	1.31865	2.19428	1
244	11_IC_0480-sil	LPS_2d	52	27	300	1044	2468	201	5	94	87	17.4	502	3.632	13.166	40.86	15	862	21	0.142705	0.189577	0.00395154	0.770203	1.24579	3.54633	1
245	11_IC_0482-sil	LPS_2d	63	31	203	609	1348	147	8	61	57	7.125	310	4.086	15.436	25.878	16	368	16	0.19704	0.240551	0.00889427	0.780233	1.26982	2.94384	3
246	11_IC_0483-sil	LPS_2d	67	33	255	862	2425	205	10	64	65	6.5	403	4.54	10.442	42.222	15	740	21	0.132846	0.240683	0.00556828	0.723797	1.25265	4.08521	2
247	11_IC_0484-sil	LPS_2d	63	32	250	878	1860	173	10	100	79	7.9	439	3.632	5.902	41.314	15	745	19	0.168661	0.196595	0.00509251	0.781194	1.26153	3.90175	1
248	11_IC_0485-sil	LPS_2d	55	28	242	847	1331	147	9	93	74	8.222	419	3.632	10.896	29.51	21	452	14	0.22293	0.173855	0.00519383	0.770599	1.3102	2.32873	6
249	11_IC_0486-sil	LPS_2d	88	39	289	863	1677	168	13	97	86	6.615	456	3.632	11.35	34.504	18	697	17	0.224943	0.195551	0.00645815	0.750921	1.30804	2.71617	1
250	11_IC_0488-sil	LPS_2d	75	35	317	921	2023	188	9	113	80	8.889	505	4.086	20.43	36.774	18	630	19	0.193612	0.201709	0.00569604	0.723084	1.31621	3.55896	1
251	11_IC_0489-sil	LPS_2d	57	29	342	842	2194	191	10	89	78	7.8	474	3.178	11.804	38.136	13	744	20	0.181767	0.228806	0.00718062	0.754678	1.2862	2.88895	1
252	11_IC_0490-sil	LPS_2d	54	29	249	878	1910	184	7	89	73	10.429	436	3.178	11.804	38.59	15	528	17	0.158511	0.20711	0.00482819	0.710123	1.27454	4.82394	1
253	11_IC_0492-sil	LPS_2d	53	28	263	809	1720	178	6	85	67	11.167	422	4.086	15.436	44.038	14	729	21	0.183996	0.21785	0.00592511	0.678767	1.27539	3.93032	1
254	11_IC_0493-sil	LPS_2d	45	25	273	973	2665	216	6	64	66	11	432	3.632	22.7	44.038	16	936	21	0.119419	0.221731	0.00422026	0.71859	1.28305	5.2882	1
255	11_IC_0495-sil	LPS_2d	78	34	213	839	1580	158	14	58	57	4.071	357	4.54	6.81	30.872	19	481	15	0.18426	0.190062	0.00529515	0.795436	1.28502	2.83044	1
256	11_IC_0496-sil	LPS_2d	48	28	194	801	1637	166	6	69	51	8.5	358	2.724	10.442	34.958	13	511	17	0.147626	0.203335	0.00454626	0.745084	1.25763	3.80242	3
257	11_IC_0497-sil	LPS_2d	66	32	276	1047	2282	193	7	88	81	11.571	476	4.086	12.712	39.044	17	1037	20	0.149771	0.183586	0.00388987	0.770176	1.27439	3.53163	1
258	11_IC_0499-sil	LPS_2d	52	27	193	748	1616	166	7	55	55	7.857	330	4.086	10.896	36.774	14	557	18	0.15167	0.219485	0.00540529	0.739599	1.24694	4.20514	3
259	11_IC_0501-sil	LPS_2d	56	28	238	791	1351	146	10	81	70	7	384	4.086	7.264	28.602	18	442	15	0.217916	0.18663	0.00600881	0.791753	1.30676	2.04512	6
260	11_IC_0502-sil	LPS_2d	54	30	161	562	1009	132	8	47	43	5.375	264	3.178	12.712	30.418	14	287	13	0.212388	0.233295	0.00837004	0.724172	1.27586	2.64769	5
261	12_IC_0524-sil	LPS_2d	75	39	316	1188	2564	208	11	110	89	8.091	546	4.086	10.896	38.136	18	843	21	0.152489	0.176119	0.00352423	0.74526	1.27363	4.12388	1
262	12_IC_0525-sil	LPS_2d	73	35	200	677	1597	163	10	59	48	4.8	327	3.178	18.16	29.056	14	424	17	0.171123	0.23437	0.00714097	0.759907	1.26408	4.3449	3
263	12_IC_0526-sil	LPS_2d	57	31	194	799	1796	193	8	53	49	6.125	339	2.27	19.068	49.94	14	413	18	0.13933	0.238789	0.00479295	0.603471	1.22727	5.33533	4
264	12_IC_0527-sil	LPS_2d	64	32	321	877	2249	188	9	86	74	8.222	457	3.632	16.344	38.59	16	780	17	0.17096	0.215608	0.00638767	0.803921	1.25721	3.45157	1
265	12_IC_0528-sil	LPS_2d	59	30	212	686	1254	142	9	72	60	6.667	346	4.086	7.264	30.872	16	437	15	0.216626	0.209225	0.00740088	0.780419	1.28847	3.0865	6
266	12_IC_0529-sil	LPS_2d	52	30	266	784	1544	162	7	81	67	9.571	401	2.724	13.62	32.234	15	619	18	0.205441	0.207568	0.00655947	0.740828	1.27637	3.16332	3
267	12_IC_0531-sil	LPS_2d	77	40	293	957	1754	166	12	97	76	6.333	484	3.178	19.522	29.964	19	524	18	0.210991	0.174194	0.00509692	0.796119	1.31073	2.76939	1
268	12_IC_0532-sil	LPS_2d	62	32	274	994	2118	189	12	84	71	5.917	470	3.632	11.804	40.86	18	853	20	0.158577	0.191256	0.00433921	0.748075	1.25655	3.6686	1
269	12_IC_0533-sil	LPS_2d	80	40	203	649	1292	150	10	66	62	6.2	327	3.178	18.614	31.326	13	379	16	0.218837	0.224943	0.00796035	0.718837	1.2729	3.06484	6
270	12_IC_0535-sil	LPS_2d	57	31	236	681	1937	183	9	58	54	6	335	3.178	9.08	35.866	12	378	17	0.151075	0.268423	0.00793392	0.728819	1.25688	3.82921	3
271	12_IC_0536-sil	LPS_2d	76	40	306	864	1601	160	9	90	68	7.556	451	3.632	18.16	28.602	21	464	17	0.238573	0.183018	0.00624229	0.781062	1.30764	2.19964	1
272	12_IC_0537-sil	LPS_2d	49	28	230	855	1802	167	7	72	69	9.857	389	3.178	14.982	33.596	17	452	16	0.154665	0.194093	0.00472687	0.811286	1.27386	3.36029	3
273	12_IC_0538-sil	LPS_2d	79	35	314	872	1989	188	6	99	82	13.667	468	3.632	12.712	39.952	16	659	19	0.197599	0.212115	0.00625991	0.704075	1.29533	3.94634	1
274	12_IC_0539-sil	LPS_2d	68	35	258	777	2018	182	11	70	65	5.909	386	3.178	16.344	34.05	14	502	18	0.161736	0.235934	0.00690749	0.767163	1.26849	3.17341	3
275	12_IC_0541-sil	LPS_2d	60	31	295	1051	1914	168	8	93	85	10.625	496	3.632	18.614	30.418	21	700	18	0.18559	0.160242	0.00406167	0.852432	1.31935	2.48174	1
276	12_IC_0542-sil	LPS_2d	66	32	225	739	1605	159	8	66	57	7.125	358	4.086	10.442	36.32	16	403	16	0.181727	0.213656	0.00660793	0.79633	1.27975	3.15569	3
277	12_IC_0543-sil	LPS_2d	98	42	201	540	1144	138	9	50	53	5.889	278	4.54	7.264	24.516	14	387	16	0.260903	0.253322	0.0125463	0.749458	1.24003	2.36343	6
278	12_IC_0544-sil	LPS_2d	72	34	243	939	1750	164	9	59	59	6.556	415	4.086	10.896	32.688	18	508	17	0.180185	0.172308	0.00437004	0.816515	1.29725	3.22926	1
279	12_IC_0545-sil	LPS_2d	61	30	221	763	2069	196	11	65	61	5.545	369	3.632	7.264	41.768	13	432	17	0.136176	0.252784	0.00590749	0.678965	1.24116	3.96939	2
280	12_IC_0546-sil	LPS_2d	84	40	166	661	1391	153	12	54	56	4.667	298	3.178	7.264	31.78	15	399	15	0.179564	0.227229	0.00688106	0.742282	1.28131	3.87107	6
281	12_IC_0547-sil	LPS_2d	92	37	323	1101	2270	196	9	96	82	9.111	533	5.448	23.608	42.222	18	913	20	0.183106	0.177471	0.00426432	0.739749	1.29231	3.38979	1
282	12_IC_0548-sil	LPS_2d	97	44	321	1142	2556	201	17	110	103	6.059	551	3.178	15.436	40.86	16	813	20	0.163401	0.177427	0.00409251	0.79593	1.27495	4.28317	1
283	12_IC_0550-sil	LPS_2d	68	31	342	1013	2161	188	8	87	77	9.625	508	4.086	16.344	35.866	19	637	20	0.189819	0.183167	0.00490749	0.770687	1.28709	3.15229	1
284	12_IC_0552-sil	LPS_2d	68	32	280	1054	2375	205	12	76	69	5.75	481	4.086	15.89	45.854	18	689	19	0.146568	0.194996	0.00394714	0.70859	1.25876	4.4554	1
285	12_IC_0554-sil	LPS_2d	87	38	277	643	1104	133	11	81	72	6.545	372	4.54	9.988	23.608	18	259	14	0.329881	0.208467	0.0112423	0.78407	1.34224	1.7309	6
286	13_IC_0575-sil	BG_3h	69	33	221	951	2376	208	6	60	51	8.5	402	4.086	22.246	43.13	12	701	23	0.121925	0.215326	0.00390308	0.690458	1.22016	4.92918	2
287	13_IC_0576-sil	BG_3h	52	27	225	1058	2179	185	6	64	61	10.167	424	3.632	14.982	35.866	17	731	20	0.127093	0.173119	0.00305286	0.80193	1.25685	5.28063	2
288	13_IC_0577-sil	BG_3h	56	30	219	820	1769	172	5	56	58	11.6	368	3.632	12.258	36.32	16	675	20	0.155066	0.204485	0.00488106	0.752626	1.24144	2.92505	2
289	13_IC_0578-sil	BG_3h	42	27	188	812	1617	163	7	55	54	7.714	342	3.632	19.068	29.51	16	515	17	0.142423	0.19726	0.00421586	0.760793	1.25294	4.11531	3
290	13_IC_0579-sil	BG_3h	44	27	163	675	1773	188	5	36	36	7.2	283	4.086	9.08	43.584	10	438	20	0.116436	0.27393	0.00548458	0.627753	1.23911	5.59442	4
291	13_IC_0580-sil	BG_3h	45	25	208	910	1817	175	6	73	66	11	403	3.632	16.344	31.78	19	597	18	0.139537	0.190454	0.00378414	0.747304	1.26282	4.81145	3
292	13_IC_0581-sil	BG_3h	57	34	175	866	1853	186	6	50	45	7.5	340	3.632	16.798	41.768	15	733	22	0.124956	0.210282	0.00373128	0.675286	1.22525	5.22966	2
293	13_IC_0582-sil	BG_3h	50	29	184	997	2217	204	5	50	50	10	383	4.086	12.258	48.124	16	712	20	0.105692	0.199423	0.00281938	0.670405	1.23844	4.38615	2
294	13_IC_0583-sil	BG_3h	51	29	231	874	2072	188	5	68	53	10.6	399	4.086	23.608	38.136	16	836	21	0.136145	0.211604	0.00449339	0.737119	1.2758	4.59048	2
295	13_IC_0584-sil	BG_3h	57	30	184	729	1877	185	6	39	38	6.333	310	3.632	11.804	39.952	12	432	18	0.128286	0.246436	0.00539648	0.692683	1.23441	4.53471	3
296	13_IC_0585-sil	BG_3h	42	25	182	854	1915	179	6	54	58	9.667	353	3.178	19.522	34.05	14	569	20	0.11689	0.206057	0.00372247	0.75	1.22187	4.0764	3
297	13_IC_0586-sil	BG_3h	45	26	195	925	2104	195	6	41	42	7	359	3.632	17.706	38.136	12	666	21	0.113784	0.208079	0.0034185	0.693921	1.21546	4.83265	4
298	13_IC_0587-sil	BG_3h	53	30	190	838	1826	174	9	59	55	6.111	365	3.632	17.706	35.412	14	473	19	0.133106	0.203837	0.00420705	0.76078	1.24589	4.09625	3
299	13_IC_0588-sil	BG_3h	64	31	213	816	1923	183	7	55	52	7.429	360	3.632	10.442	40.86	12	652	21	0.14404	0.218427	0.00496035	0.721965	1.21867	4.13151	2
300	13_IC_0589-sil	BG_3h	73	35	213	827	2051	180	11	60	63	5.727	373	3.178	13.62	34.504	14	677	20	0.13967	0.215762	0.00515859	0.793207	1.22283	3.63149	3
301	13_IC_0590-sil	BG_3h	63	32	154	665	1813	177	6	39	36	6	283	4.086	11.35	37.682	11	392	18	0.119634	0.259828	0.00586784	0.726678	1.18644	5.41861	3
302	13_IC_0591-sil	BG_3h	56	30	161	776	2055	180	6	33	30	5	305	4.086	14.528	37.228	14	401	20	0.105987	0.225771	0.00431718	0.798802	1.20396	4.87758	3
303	13_IC_0592-sil	BG_3h	45	26	130	536	1296	143	5	31	35	7	225	4.086	12.712	26.332	13	202	14	0.135031	0.264533	0.00757269	0.801361	1.19983	4.00175	5
304	13_IC_0593-sil	BG_3h	79	35	373	1189	2604	212	9	99	89	9.889	589	4.54	15.436	43.13	21	1131	21	0.173696	0.176784	0.00394273	0.72626	1.31741	3.42025	1
305	13_IC_0594-sil	BG_3h	60	33	213	734	1999	184	6	39	39	6.5	322	3.178	21.792	35.866	16	532	19	0.136802	0.244705	0.00610132	0.744709	1.22388	3.8657	3
306	13_IC_0595-sil	BG_3h	71	35	255	931	2530	216	8	49	51	6.375	400	3.632	13.62	48.578	15	756	21	0.128912	0.228921	0.00459031	0.679423	1.24384	5.32427	2
307	13_IC_0597-sil	BG_3h	53	29	163	624	1565	162	5	42	45	9	284	3.632	10.896	38.59	14	562	20	0.138551	0.255176	0.00673568	0.746374	1.22974	3.5254	3
308	13_IC_0598-sil	BG_3h	52	29	177	697	1708	167	6	49	47	7.833	308	3.632	10.896	35.412	12	434	19	0.133881	0.236123	0.00574009	0.768811	1.22742	4.77071	3
309	13_IC_0599-sil	BG_3h	51	30	267	987	2884	221	6	64	58	9.667	443	3.632	17.252	44.946	14	734	21	0.110269	0.220938	0.00398238	0.73978	1.24934	5.39372	2
310	13_IC_0600-sil	BG_3h	48	28	207	981	1927	178	8	63	60	7.5	405	4.086	9.08	37.228	16	624	19	0.132247	0.179881	0.00326432	0.762515	1.29242	4.15028	1
311	13_IC_0601-sil	BG_3h	50	29	179	674	1293	154	7	47	49	7	295	4.086	12.258	32.234	16	408	16	0.177498	0.224128	0.0060837	0.682101	1.25033	3.34484	3
312	13_IC_0602-sil	BG_3h	46	27	145	585	1455	156	4	42	40	10	256	4.086	20.43	26.332	11	462	18	0.130775	0.258088	0.00656828	0.75407	1.21041	3.89497	3
313	13_IC_0604-sil	BG_3h	74	35	170	670	1786	173	8	41	44	5.5	288	3.632	12.258	30.872	11	472	17	0.136251	0.251238	0.00648458	0.754154	1.19215	4.74358	3
314	14_IC_0626-sil	BG_3h	45	27	94	492	1311	152	6	30	32	5.333	196	3.178	20.884	38.136	10	431	20	0.106388	0.298621	0.00673568	0.709899	1.15202	5.4966	5
315	14_IC_0628-sil	BG_3h	44	27	175	681	1696	168	6	39	41	6.833	301	3.632	16.344	28.148	14	371	17	0.12885	0.241132	0.00564317	0.753093	1.22253	4.18631	3
316	14_IC_0629-sil	BG_3h	48	28	140	653	1431	149	6	37	37	6.167	261	4.086	9.534	32.234	12	321	17	0.131366	0.224855	0.00540529	0.813604	1.24703	4.62649	3
317	14_IC_0630-sil	BG_3h	48	27	188	859	1784	180	6	56	51	8.5	350	3.632	15.436	37.682	14	489	19	0.13189	0.206678	0.00390749	0.693564	1.26031	4.3929	3
318	14_IC_0631-sil	BG_3h	48	28	133	698	1367	163	6	38	41	6.833	268	3.632	19.522	34.05	14	464	17	0.13241	0.226868	0.00443172	0.650335	1.22001	5.07426	3
319	14_IC_0632-sil	BG_3h	63	31	273	993	2189	185	6	79	73	12.167	456	4.086	19.976	33.142	19	646	20	0.153515	0.18278	0.00414097	0.807595	1.29032	3.64894	1
320	14_IC_0633-sil	BG_3h	51	28	190	831	2013	181	8	41	39	4.875	338	3.178	19.522	37.682	18	601	20	0.119476	0.213348	0.00421145	0.774727	1.23449	5.15386	3
321	14_IC_0634-sil	BG_3h	62	32	255	883	1874	178	10	59	52	5.2	405	3.178	10.896	34.05	17	553	19	0.169405	0.199339	0.00499119	0.741634	1.27895	3.85436	3
322	14_IC_0635-sil	BG_3h	52	29	290	918	1798	174	7	93	70	10	459	3.632	11.804	39.952	16	623	19	0.190286	0.189678	0.00508811	0.743216	1.30946	2.88232	1
323	14_IC_0636-sil	BG_3h	63	32	270	1151	2473	220	7	94	73	10.429	512	4.086	16.344	47.67	20	911	21	0.134965	0.188868	0.00310573	0.644921	1.26945	4.91808	1
324	14_IC_0637-sil	BG_3h	52	29	196	889	1711	165	7	70	60	8.571	383	4.54	15.89	29.964	14	513	17	0.145427	0.183846	0.00388987	0.79152	1.26205	3.88692	2
325	14_IC_0638-sil	BG_3h	53	30	296	1127	2523	197	6	87	82	13.667	509	3.178	17.252	39.044	17	812	20	0.138115	0.172145	0.0033348	0.814709	1.27099	4.20379	1
326	14_IC_0641-sil	BG_3h	54	29	166	584	1429	150	5	46	41	8.2	276	4.086	14.074	29.056	13	418	18	0.153952	0.250568	0.00770485	0.797348	1.2343	4.18815	3
327	14_IC_0642-sil	BG_3h	66	32	212	698	1813	171	4	48	38	9.5	318	4.086	17.706	31.78	14	479	18	0.153586	0.240586	0.00691189	0.77759	1.21788	4.44282	3
328	14_IC_0643-sil	BG_3h	70	33	200	851	2149	186	6	57	60	10	370	4.086	20.43	41.314	18	612	19	0.125815	0.213577	0.00449339	0.783216	1.25479	5.15062	2
329	14_IC_0644-sil	BG_3h	51	30	221	856	2008	193	7	58	61	8.714	379	3.178	8.172	38.136	17	584	18	0.135189	0.220097	0.0044185	0.674449	1.24925	3.72178	1
330	14_IC_0645-sil	BG_3h	54	29	190	827	2013	182	6	45	42	7	347	4.086	13.62	33.142	14	421	19	0.121154	0.215498	0.00430396	0.765145	1.23701	4.59998	3
331	14_IC_0646-sil	BG_3h	58	30	290	992	2318	200	7	75	75	10.714	461	4.086	15.436	43.13	16	873	22	0.15007	0.200683	0.00442291	0.731643	1.26705	3.37648	1
332	14_IC_0647-sil	BG_3h	64	38	398	1581	3531	254	9	128	103	11.444	723	3.178	15.89	64.468	24	1384	24	0.130797	0.158894	0.00226432	0.685247	1.29075	4.48052	1
333	14_IC_0648-sil	BG_3h	50	29	127	557	1147	144	5	28	33	6.6	232	4.086	7.264	35.412	10	387	18	0.154952	0.248626	0.0066652	0.695665	1.21513	3.82209	5
334	14_IC_0649-sil	BG_3h	43	27	170	904	1569	157	5	44	43	8.6	346	4.086	14.074	28.148	18	476	17	0.136057	0.171555	0.00322026	0.803921	1.24793	3.10134	3
335	14_IC_0650-sil	BG_3h	42	24	158	726	1716	168	6	36	36	6	294	3.632	9.08	36.774	13	421	16	0.116626	0.228916	0.00465639	0.761996	1.2208	5.4356	3
336	14_IC_0651-sil	BG_3h	40	26	177	714	2011	181	6	42	43	7.167	307	2.724	16.344	31.78	16	426	18	0.107925	0.249295	0.005163	0.76996	1.2086	5.5495	3
337	14_IC_0652-sil	BG_3h	49	30	275	1095	2287	185	7	74	73	10.429	469	3.178	17.706	37.682	19	673	19	0.141586	0.166498	0.00328194	0.8357	1.29554	2.68905	1
338	14_IC_0653-sil	BG_3h	45	27	195	676	1590	162	6	45	47	7.833	304	3.178	9.08	30.418	15	447	16	0.151137	0.237115	0.00648018	0.762656	1.27064	3.85842	3
339	14_IC_0654-sil	BG_3h	46	26	165	612	1228	153	8	41	43	5.375	278	3.178	18.614	36.774	12	513	16	0.171762	0.247163	0.00689868	0.657383	1.26805	4.0828	3
340	14_IC_0655-sil	BG_3h	51	27	143	785	1402	151	8	36	44	5.5	299	3.632	11.35	26.786	16	316	14	0.138744	0.188278	0.00380176	0.77315	1.25758	3.485	3
341	14_IC_0656-sil	BG_3h	59	30	148	683	1722	168	5	37	35	7	279	4.54	18.614	31.326	12	424	20	0.120044	0.240273	0.00529956	0.764696	1.19774	5.11742	4
342	14_IC_0657-sil	BG_3h	39	25	150	796	1599	165	5	36	41	8.2	312	3.178	11.804	34.504	13	302	19	0.117837	0.202515	0.0035859	0.741753	1.2246	4.50724	3
343	14_IC_0658-sil	BG_3h	40	25	156	846	1833	177	3	41	38	12.667	321	3.632	20.43	36.32	15	479	20	0.106943	0.205278	0.0033304	0.738678	1.20827	5.04189	4
344	15_IC_0678-sil	BG_3h	48	27	157	699	1717	165	7	35	40	5.714	275	3.632	9.534	32.234	12	397	19	0.119537	0.232441	0.00510573	0.790233	1.22856	4.37625	3
345	15_IC_0679-sil	BG_3h	55	30	173	755	2118	195	5	44	45	9	312	3.632	19.976	39.044	13	594	20	0.1077	0.251022	0.00476211	0.701511	1.2084	5.1413	2
346	15_IC_0680-sil	BG_3h	56	28	134	568	1352	150	6	22	28	4.667	225	3.632	13.62	30.872	12	247	17	0.140229	0.259405	0.00709692	0.7523	1.17949	4.26956	5
347	15_IC_0681-sil	BG_3h	57	30	102	492	1269	151	6	19	27	4.5	188	4.54	9.08	36.32	10	258	14	0.125414	0.297806	0.00778414	0.69989	1.19682	5.57771	5
348	15_IC_0682-sil	BG_3h	63	32	163	686	2050	180	6	36	41	6.833	291	4.54	29.51	33.596	12	670	21	0.110145	0.256286	0.00572247	0.790837	1.19915	5.1173	4
349	15_IC_0683-sil	BG_3h	41	25	162	639	1388	148	6	44	42	7	288	3.178	11.35	32.688	12	360	17	0.146374	0.229198	0.00615859	0.801004	1.23966	3.67251	5
350	15_IC_0684-sil	BG_3h	49	29	158	843	2174	182	4	35	35	8.75	313	4.086	17.252	40.86	13	452	21	0.095163	0.213678	0.00357269	0.82222	1.2226	5.27714	4
351	15_IC_0685-sil	BG_3h	55	30	113	521	1404	155	5	22	21	4.2	205	3.632	15.436	31.326	10	217	20	0.119194	0.288009	0.00727753	0.73622	1.16622	5.27582	5
352	15_IC_0686-sil	BG_3h	52	30	177	803	1569	165	5	51	52	10.4	335	3.632	10.896	33.596	14	375	17	0.145877	0.201775	0.00429956	0.723982	1.25429	4.18452	3
353	15_IC_0687-sil	BG_3h	58	31	230	800	1994	190	4	55	57	14.25	369	4.54	16.344	38.136	16	650	19	0.144132	0.231066	0.00535242	0.695731	1.22849	4.63322	2
354	15_IC_0688-sil	BG_3h	48	27	160	672	1589	156	5	38	44	8.8	277	4.086	12.258	30.418	13	371	17	0.130454	0.226348	0.00545815	0.816339	1.22036	3.13228	3
355	15_IC_0689-sil	BG_3h	42	26	169	727	1678	180	5	40	43	8.6	301	3.632	12.712	38.136	12	478	19	0.12604	0.241388	0.00479295	0.652313	1.23438	4.31826	4
356	15_IC_0690-sil	BG_3h	44	26	159	742	1835	187	4	42	36	9	307	3.632	15.89	41.768	14	443	18	0.110819	0.245317	0.00438767	0.657577	1.21921	6.33588	4
357	15_IC_0691-sil	BG_3h	32	22	131	626	1690	169	4	26	30	7.5	242	3.632	12.258	32.688	11	262	18	0.0961101	0.266335	0.00504846	0.740775	1.17789	5.95491	4
358	15_IC_0692-sil	BG_3h	41	24	153	658	1442	153	6	41	38	6.333	285	3.632	9.534	31.326	12	238	16	0.134427	0.225656	0.0053304	0.778551	1.28098	3.89238	5
359	15_IC_0693-sil	BG_3h	54	29	106	545	1160	147	6	26	31	5.167	210	4.086	11.35	35.412	11	286	15	0.137511	0.264467	0.00645815	0.671489	1.20159	4.03513	5
360	15_IC_0694-sil	BG_3h	54	29	183	802	1777	171	10	46	47	4.7	333	4.086	12.258	33.142	13	371	17	0.133013	0.211476	0.00455947	0.766154	1.22973	4.5053	3
361	15_IC_0695-sil	BG_3h	51	30	161	753	1800	167	3	36	36	12	301	3.632	9.988	36.32	11	598	20	0.117524	0.215921	0.00445374	0.812683	1.22612	4.44799	4
362	15_IC_0696-sil	BG_3h	54	29	123	629	1613	169	7	31	32	4.571	243	3.632	10.896	33.596	12	266	16	0.110048	0.261894	0.00537885	0.712577	1.14672	6.24507	5
363	15_IC_0697-sil	BG_3h	46	27	159	720	1506	159	8	46	42	5.25	301	3.178	15.89	36.32	16	492	17	0.135881	0.219366	0.00489868	0.749291	1.24476	4.58871	3
364	15_IC_0698-sil	BG_3h	49	28	169	761	1685	168	4	51	49	12.25	319	4.086	15.89	39.044	18	606	21	0.129498	0.216203	0.00451542	0.746247	1.23241	4.65053	4
365	15_IC_0699-sil	BG_3h	64	35	160	701	1568	157	8	32	33	4.125	280	3.178	13.62	32.234	13	379	18	0.142952	0.218987	0.00547577	0.798731	1.20893	3.98012	3
366	15_IC_0700-sil	BG_3h	45	27	118	625	1231	136	8	25	29	3.625	241	3.632	17.706	27.24	13	286	17	0.132419	0.214185	0.00504846	0.831286	1.18603	3.14322	5
367	15_IC_0701-sil	BG_3h	60	32	170	866	1821	172	6	46	47	7.833	342	3.632	15.89	33.596	14	370	18	0.126119	0.195211	0.00371366	0.773079	1.23763	3.68035	3
368	15_IC_0702-sil	BG_3h	43	27	120	708	1247	141	6	32	34	5.667	267	3.178	12.712	28.602	14	429	18	0.130251	0.197449	0.00403084	0.793907	1.23535	3.77479	3
369	15_IC_0703-sil	BG_3h	62	36	109	573	1274	142	7	25	27	3.857	217	3.632	9.534	28.602	12	382	18	0.134463	0.234172	0.00586344	0.795273	1.19714	4.59966	5
370	15_IC_0704-sil	BG_3h	49	29	157	706	1856	175	5	39	40	8	290	3.632	19.522	34.05	15	565	19	0.111167	0.240537	0.00492511	0.765573	1.18931	4.98396	4
371	15_IC_0705-sil	BG_3h	68	31	197	749	1860	177	6	50	48	8	333	4.54	12.258	34.05	13	503	17	0.142286	0.231273	0.00570485	0.749537	1.22324	4.36644	3
372	15_IC_0706-sil	BG_3h	49	28	130	575	1520	160	5	29	32	6.4	235	3.632	21.338	34.05	14	368	18	0.118004	0.269599	0.00640088	0.746031	1.20324	5.0004	4
373	15_IC_0708-sil	BG_3h	42	25	180	599	1287	149	6	36	36	6	277	3.632	9.988	30.418	11	358	17	0.172432	0.242414	0.00740969	0.731445	1.26652	3.39366	5
374	15_IC_0709-sil	BG_3h	60	30	339	960	2263	189	6	86	72	12	502	4.54	17.706	33.596	18	849	20	0.176489	0.195546	0.00535242	0.793344	1.24619	2.95584	1
375	15_IC_0710-sil	BG_3h	63	32	140	627	1588	164	5	32	34	6.8	253	3.632	14.074	35.412	12	496	19	0.128097	0.253247	0.00610132	0.742797	1.19782	4.49181	3
376	16_IC_0731-sil	BG_1d	51	28	197	605	1861	172	4	46	45	11.25	296	4.086	15.89	34.504	14	469	19	0.132943	0.27907	0.00822026	0.794018	1.206	5.04584	3
377	16_IC_0733-sil	BG_1d	48	28	177	722	1553	168	5	35	38	7.6	305	3.632	11.804	45.4	10	524	22	0.144833	0.226815	0.00513656	0.689586	1.23087	3.99044	4
378	16_IC_0734-sil	BG_1d	61	31	192	990	2386	195	6	50	54	9	393	3.178	10.896	35.412	14	652	20	0.10622	0.193463	0.00314097	0.790498	1.2133	5.22616	2
379	16_IC_0735-sil	BG_1d	49	27	133	623	1625	166	5	31	31	6.2	251	3.632	6.356	34.958	10	302	17	0.111604	0.259233	0.00557709	0.743749	1.21324	6.29596	5
380	16_IC_0736-sil	BG_1d	57	30	164	785	1760	184	5	44	38	7.6	317	3.178	12.258	44.038	12	444	20	0.125722	0.229185	0.00429956	0.650806	1.21157	3.81616	4
381	16_IC_0737-sil	BG_1d	51	28	212	1036	2435	207	2	41	35	17.5	401	4.54	16.798	48.124	15	664	24	0.107912	0.196559	0.00296476	0.710921	1.22451	5.42854	2
382	16_IC_0738-sil	BG_1d	47	27	135	664	1590	165	6	42	46	7.667	267	3.178	11.804	33.142	13	306	15	0.114357	0.242991	0.00494273	0.731718	1.2011	5.0416	3
383	16_IC_0739-sil	BG_1d	63	35	130	662	2080	199	6	22	28	4.667	246	4.086	24.516	36.774	10	437	23	0.0927445	0.291167	0.00518502	0.659388	1.1371	7.46365	4
384	16_IC_0740-sil	BG_1d	54	30	178	823	1606	163	7	41	41	5.857	340	3.178	14.528	35.866	16	429	17	0.144709	0.192502	0.00406167	0.757419	1.25677	4.13479	3
385	16_IC_0741-sil	BG_1d	64	31	214	899	2474	196	7	55	55	7.857	385	4.086	15.436	38.136	14	631	21	0.112295	0.213101	0.00414097	0.812066	1.23234	5.04381	2
386	16_IC_0742-sil	BG_1d	62	30	215	915	2499	200	5	48	49	9.8	383	4.086	21.792	37.682	14	640	23	0.110727	0.214286	0.00398238	0.783423	1.25348	5.8303	2
387	16_IC_0743-sil	BG_1d	50	29	154	614	1729	166	5	34	37	7.4	260	4.086	15.436	34.958	11	360	19	0.118026	0.265048	0.00654185	0.789031	1.17908	4.72498	4
388	16_IC_0744-sil	BG_1d	56	31	165	577	1455	153	5	29	35	7	255	3.632	15.89	29.964	13	420	17	0.152335	0.255392	0.00773568	0.778709	1.24264	3.66374	3
389	16_IC_0745-sil	BG_1d	49	28	138	673	1240	153	6	44	42	7	283	2.27	14.982	33.142	13	492	17	0.150502	0.22237	0.00495595	0.665722	1.22082	3.62389	3
390	16_IC_0746-sil	BG_1d	60	31	223	786	1713	191	7	58	52	7.429	362	3.632	10.442	42.222	11	460	21	0.165379	0.2407	0.00565639	0.590564	1.23962	4.23965	2
391	16_IC_0747-sil	BG_1d	59	30	231	820	1765	166	9	57	51	5.667	371	3.632	15.89	39.498	15	668	18	0.164374	0.203053	0.00544493	0.803128	1.24089	3.75672	3
392	16_IC_0749-sil	BG_1d	46	26	168	800	2040	175	7	43	37	5.286	319	3.632	18.614	33.142	13	494	21	0.104511	0.215198	0.00403084	0.832493	1.21726	5.55338	3
393	16_IC_0750-sil	BG_1d	46	27	160	720	1918	173	7	38	41	5.857	291	3.178	12.712	31.78	14	503	18	0.107595	0.235661	0.004837	0.809833	1.20369	4.45889	3
394	16_IC_0751-sil	BG_1d	53	30	153	675	1651	163	8	31	35	4.375	270	3.632	10.442	38.59	11	557	19	0.125154	0.239335	0.00559912	0.780833	1.21865	4.82403	3
395	16_IC_0752-sil	BG_1d	51	30	176	664	1488	158	8	59	52	6.5	303	3.178	6.81	29.51	13	336	15	0.152617	0.236031	0.00635242	0.746934	1.23338	3.9301	3
396	16_IC_0753-sil	BG_1d	62	35	221	778	2084	195	8	62	61	7.625	365	3.632	15.436	41.314	13	673	21	0.135507	0.250145	0.00581498	0.685648	1.24639	5.10024	2
397	16_IC_0754-sil	BG_1d	56	29	210	758	2051	197	5	41	37	7.4	332	4.086	21.338	42.676	11	567	21	0.12993	0.25641	0.00564758	0.660877	1.25592	5.77416	2
398	16_IC_0755-sil	BG_1d	53	28	188	862	2055	187	9	34	37	4.111	334	3.632	14.982	37.682	15	572	19	0.117427	0.214938	0.00401322	0.739718	1.23561	5.19088	3
399	16_IC_0756-sil	BG_1d	60	30	178	672	2261	190	5	41	44	8.8	303	4.54	20.43	34.958	11	707	20	0.105295	0.276533	0.00630837	0.783467	1.18281	6.85753	4
400	16_IC_0757-sil	BG_1d	54	29	165	622	1410	159	6	32	34	5.667	263	4.086	10.896	37.228	14	375	17	0.155163	0.251344	0.006837	0.697621	1.24491	4.3468	3
401	16_IC_0758-sil	BG_1d	38	25	142	703	1923	189	5	31	34	6.8	270	3.178	17.706	44.946	10	523	21	0.0937753	0.263374	0.00440529	0.677546	1.17163	6.02072	4
402	16_IC_0759-sil	BG_1d	61	32	188	830	1847	183	5	43	44	8.8	340	4.086	10.896	34.504	11	697	22	0.135093	0.215106	0.0043348	0.693317	1.24017	3.9654	2
403	17_IC_0780-sil	BG_1d	65	34	254	835	2531	202	5	59	58	11.6	390	4.086	19.068	37.682	15	642	22	0.125943	0.235683	0.00546256	0.78085	1.22944	4.30177	2
404	17_IC_0781-sil	BG_1d	58	30	157	565	1528	155	4	35	39	9.75	258	4.086	10.442	29.056	11	399	17	0.140326	0.266044	0.00791189	0.796436	1.20107	4.5426	3
405	17_IC_0782-sil	BG_1d	66	31	203	883	2702	217	7	50	48	6.857	378	4.086	10.896	52.21	12	961	23	0.0995463	0.241903	0.00419824	0.721022	1.21253	6.41116	2
406	17_IC_0783-sil	BG_1d	58	34	223	989	1832	177	7	55	58	8.286	413	2.724	17.706	36.774	15	548	19	0.153648	0.174555	0.00345374	0.738163	1.2549	3.36054	1
407	17_IC_0784-sil	BG_1d	76	35	284	976	2465	196	7	76	69	9.857	464	3.632	27.24	34.504	17	701	22	0.14578	0.199586	0.0046652	0.803467	1.25455	3.84655	2
408	17_IC_0785-sil	BG_1d	67	32	171	701	1496	159	9	56	46	5.111	319	4.086	15.436	33.596	14	331	17	0.158877	0.22307	0.00588987	0.744775	1.24179	3.81983	3
409	17_IC_0786-sil	BG_1d	56	29	153	606	1458	161	8	33	31	3.875	258	3.632	13.166	35.412	13	302	17	0.143493	0.264062	0.00707489	0.707137	1.22655	3.9298	3
410	17_IC_0787-sil	BG_1d	55	30	170	686	1482	165	6	44	44	7.333	302	3.178	10.442	32.234	15	586	16	0.151775	0.238	0.00584581	0.680053	1.22613	3.95108	3
411	17_IC_0788-sil	BG_1d	55	28	275	969	2300	192	5	70	63	12.6	448	4.086	22.246	34.958	15	965	21	0.143256	0.195247	0.00427753	0.783551	1.26772	3.83262	2
412	17_IC_0789-sil	BG_1d	58	30	199	780	1797	163	7	50	50	7.143	333	3.632	20.884	32.688	14	347	18	0.143084	0.208044	0.0052511	0.847577	1.22917	3.80387	3
413	17_IC_0790-sil	BG_1d	75	33	189	709	1933	178	5	54	51	10.2	323	4.54	8.626	33.142	12	435	18	0.136308	0.243841	0.0062467	0.770969	1.22817	4.35891	3
414	17_IC_0791-sil	BG_1d	63	34	231	679	1839	171	7	45	47	6.714	323	3.178	14.074	30.872	13	440	17	0.159899	0.252176	0.00803965	0.79074	1.24351	3.98667	3
415	17_IC_0792-sil	BG_1d	64	34	209	892	2167	183	6	61	56	9.333	383	3.178	21.338	37.682	14	534	21	0.126194	0.202053	0.00418062	0.811639	1.2131	4.20295	2
416	17_IC_0793-sil	BG_1d	76	35	312	1022	2198	191	8	100	85	10.625	509	4.086	12.258	41.314	19	1103	20	0.176304	0.185137	0.00456828	0.756128	1.30817	2.89604	1
417	17_IC_0794-sil	BG_1d	65	31	281	819	1848	175	8	77	70	8.75	418	4.086	13.62	36.774	19	660	18	0.187044	0.212885	0.00644053	0.76	1.28392	2.98521	1
418	17_IC_0795-sil	BG_1d	42	26	296	971	2752	212	6	91	78	13	480	3.178	12.712	41.768	17	1050	21	0.123013	0.217432	0.00448458	0.770996	1.24639	4.93713	1
419	17_IC_0796-sil	BG_1d	58	31	303	897	2205	200	7	79	73	10.429	452	4.086	10.896	44.492	15	632	20	0.164009	0.221022	0.00557709	0.696057	1.28044	3.85048	1
420	17_IC_0797-sil	BG_1d	57	29	277	906	2347	196	4	79	66	16.5	441	4.086	10.896	44.492	14	706	21	0.142278	0.213313	0.00498678	0.770374	1.25659	4.45879	2
421	17_IC_0798-sil	BG_1d	73	37	350	1155	2493	209	8	114	96	12	574	3.632	12.712	44.038	16	1168	22	0.169542	0.180427	0.00396476	0.718159	1.27471	3.36372	1
422	17_IC_0799-sil	BG_1d	50	27	204	812	1695	173	7	66	56	8	367	3.178	14.074	38.136	17	461	16	0.149894	0.211683	0.00479295	0.713833	1.2836	3.6655	3
423	17_IC_0800-sil	BG_1d	53	28	271	1083	2204	196	7	86	78	11.143	484	3.178	21.792	43.13	19	970	21	0.146692	0.179811	0.0034141	0.720101	1.29367	4.15184	1
424	17_IC_0801-sil	BG_1d	47	26	309	1030	2353	210	6	100	74	12.333	513	3.178	14.074	49.94	19	1155	21	0.151251	0.202233	0.00415859	0.672137	1.2994	4.7107	1
425	17_IC_0802-sil	BG_1d	62	31	252	805	2295	196	7	59	52	7.429	385	3.632	20.884	38.136	15	529	19	0.137075	0.239216	0.00586784	0.747894	1.2764	4.50995	2
426	17_IC_0803-sil	BG_1d	58	31	288	818	2010	187	8	75	71	8.875	423	3.632	18.614	33.596	16	748	19	0.172295	0.229097	0.00655947	0.725489	1.26936	3.72705	1
427	17_IC_0804-sil	BG_1d	51	27	192	703	1702	171	7	55	54	7.714	314	3.632	21.338	35.866	14	619	20	0.14248	0.242053	0.00609251	0.729912	1.2451	5.04658	3
428	17_IC_0805-sil	BG_1d	55	29	277	867	2291	188	6	71	64	10.667	436	3.632	14.074	40.406	15	731	21	0.144912	0.211956	0.0053304	0.818784	1.26108	3.44527	2
429	17_IC_0806-sil	BG_1d	61	31	285	1002	2786	209	5	54	52	10.4	444	4.54	11.35	40.406	15	784	24	0.124079	0.206141	0.00423348	0.802652	1.2522	4.18022	2
430	17_IC_0807-sil	BG_1d	61	30	228	902	1991	183	4	64	54	13.5	399	4.54	10.442	33.142	16	558	17	0.14548	0.19911	0.00432159	0.749123	1.23769	4.15693	2
431	18_IC_0828-sil	BG_1d	70	36	233	870	2035	194	7	63	66	9.429	379	4.086	12.712	44.946	14	696	20	0.14867	0.222626	0.00499119	0.67715	1.24176	5.17153	2
432	18_IC_0829-sil	BG_1d	72	34	334	1059	2400	195	9	82	77	8.556	506	4.54	14.528	33.596	20	705	19	0.169194	0.18263	0.00448458	0.795022	1.27908	3.96169	1
433	18_IC_0830-sil	BG_1d	63	33	143	676	1637	158	6	32	33	5.5	264	4.54	12.712	32.688	12	224	18	0.125877	0.227643	0.00539207	0.826709	1.20811	3.53406	3
434	18_IC_0831-sil	BG_1d	49	27	221	869	1772	164	4	56	46	11.5	384	3.632	13.62	37.228	15	569	19	0.152436	0.186053	0.00436123	0.826542	1.24441	3.32279	3
435	18_IC_0832-sil	BG_1d	56	32	245	1065	2472	200	8	61	55	6.875	456	3.632	22.246	46.762	16	740	21	0.121744	0.185599	0.00327313	0.780194	1.23519	4.93414	1
436	18_IC_0833-sil	BG_1d	62	34	172	680	1612	164	6	29	33	5.5	281	2.724	12.258	36.32	13	321	19	0.145678	0.237128	0.006163	0.752163	1.24569	4.09292	3
437	18_IC_0834-sil	BG_1d	63	30	224	1104	2213	182	7	60	51	7.286	435	4.086	23.154	31.78	19	534	20	0.129344	0.162837	0.00288546	0.841335	1.23974	3.5911	2
438	18_IC_0835-sil	BG_1d	56	30	132	520	1181	156	4	26	27	6.75	229	4.086	9.534	38.136	10	321	20	0.159537	0.287744	0.00803524	0.608216	1.23975	4.0463	5
439	18_IC_0836-sil	BG_1d	47	26	181	718	1535	164	6	35	32	5.333	298	4.086	11.35	33.142	14	418	18	0.148278	0.227115	0.00549339	0.71811	1.23554	3.90595	3
440	18_IC_0837-sil	BG_1d	44	25	198	1044	2195	190	6	53	55	9.167	403	3.632	21.338	34.958	17	823	21	0.110035	0.179784	0.00272247	0.766053	1.24602	4.3959	2
441	18_IC_0838-sil	BG_1d	57	32	148	711	1804	171	5	38	37	7.4	293	4.54	14.074	37.682	15	365	18	0.113586	0.231621	0.00472687	0.775978	1.20834	4.82984	4
442	18_IC_0839-sil	BG_1d	48	28	138	710	1474	152	6	33	35	5.833	273	3.178	17.252	31.78	12	404	18	0.125863	0.209604	0.00445374	0.805476	1.21934	4.23363	3
443	18_IC_0840-sil	BG_1d	46	25	258	974	2749	227	4	55	53	13.25	428	4.086	27.24	43.13	16	878	25	0.110894	0.229815	0.00393392	0.671634	1.22805	5.84566	2
444	18_IC_0841-sil	BG_1d	56	28	175	718	1793	167	5	37	34	6.8	304	4.086	18.614	33.596	12	534	17	0.128767	0.229542	0.00549339	0.809493	1.20213	4.08296	3
445	18_IC_0842-sil	BG_1d	65	33	264	902	1819	166	6	59	62	10.333	419	3.632	18.614	32.234	20	524	19	0.180692	0.179811	0.004837	0.827683	1.27707	2.83256	1
446	18_IC_0843-sil	BG_1d	56	28	181	737	2131	187	7	47	47	6.714	322	3.632	14.528	35.412	15	424	18	0.110841	0.248344	0.00523348	0.765577	1.21338	4.96936	3
447	18_IC_0844-sil	BG_1d	69	34	211	863	1899	175	8	38	38	4.75	349	4.086	19.976	36.32	15	504	21	0.147441	0.202251	0.00467401	0.775229	1.23312	3.68934	3
448	18_IC_0846-sil	BG_1d	43	25	125	586	982	140	5	36	33	6.6	249	3.632	8.626	32.234	11	197	16	0.171767	0.230797	0.00577093	0.630841	1.2548	3.26445	5
449	18_IC_0847-sil	BG_1d	65	35	162	830	1771	184	6	40	42	7	327	3.632	12.258	40.86	16	267	16	0.127661	0.215463	0.00388987	0.656555	1.23884	6.10311	3
450	18_IC_0848-sil	BG_1d	66	36	141	623	1366	155	8	28	30	3.75	249	3.178	7.718	29.964	12	302	16	0.151374	0.240551	0.00629075	0.718172	1.22837	4.19888	5
451	18_IC_0849-sil	BG_1d	53	28	256	1033	2748	205	4	48	51	12.75	432	4.54	22.246	38.59	17	647	20	0.112498	0.195753	0.00354185	0.821938	1.21701	4.40377	2
452	18_IC_0850-sil	BG_1d	47	27	190	835	1957	181	4	46	41	10.25	357	4.54	11.804	34.504	14	395	19	0.121088	0.212458	0.00409692	0.749498	1.23241	3.86402	4
453	18_IC_0851-sil	BG_1d	56	29	341	1328	3097	231	6	91	77	12.833	584	3.632	11.804	46.308	17	815	22	0.128031	0.172163	0.00276652	0.728696	1.26501	4.85972	1
454	18_IC_0852-sil	BG_1d	59	30	252	1060	2135	194	9	65	67	7.444	451	4.086	7.718	43.13	14	647	21	0.145868	0.183577	0.00351101	0.713938	1.26605	4.45523	1
455	18_IC_0853-sil	BG_1d	47	26	173	783	2015	180	5	36	40	8	309	3.632	12.712	38.136	14	495	20	0.109269	0.226599	0.00437445	0.779493	1.21788	4.76832	4
456	18_IC_0854-sil	BG_1d	43	25	124	459	933	135	6	22	26	4.333	203	3.632	12.258	28.602	11	183	16	0.178965	0.287093	0.00944934	0.640458	1.22978	3.92186	5
457	18_IC_0855-sil	BG_1d	45	26	144	583	1236	154	6	41	32	5.333	255	3.632	6.356	29.51	11	306	16	0.152965	0.257991	0.00667401	0.655705	1.22166	4.68066	5
458	18_IC_0856-sil	BG_1d	56	32	382	1133	3378	241	6	98	79	13.167	573	4.086	17.706	47.216	20	1013	24	0.129577	0.209278	0.00415859	0.733123	1.27169	4.42326	1
459	18_IC_0857-sil	BG_1d	59	32	327	942	1963	180	9	89	83	9.222	483	3.178	17.252	33.142	17	561	18	0.196577	0.189634	0.00537004	0.759379	1.30985	3.24666	1
460	19_IC_0875-sil	BG_2d	71	32	233	637	1906	186	6	59	52	8.667	336	4.086	11.804	35.866	12	489	19	0.159555	0.294053	0.00951101	0.689507	1.22401	4.94724	2
461	19_IC_0876-sil	BG_2d	42	24	221	790	1774	185	4	64	52	13	368	3.178	15.89	45.4	18	648	19	0.148264	0.23215	0.00518943	0.649555	1.23556	4.83751	2
462	19_IC_0877-sil	BG_2d	60	31	260	851	2142	194	5	72	60	12	422	4.086	19.068	35.866	18	575	18	0.149586	0.22263	0.00531278	0.716352	1.26309	3.81206	2
463	19_IC_0878-sil	BG_2d	48	27	234	749	2121	193	5	65	56	11.2	367	3.178	20.884	43.584	16	608	21	0.132947	0.253352	0.00611013	0.716013	1.26387	4.2128	2
464	19_IC_0879-sil	BG_2d	68	36	301	840	2319	190	8	55	63	7.875	415	3.178	22.246	37.228	16	472	21	0.158881	0.221256	0.0062467	0.803269	1.2573	3.10999	2
465	19_IC_0880-sil	BG_2d	74	35	194	745	1856	186	6	40	37	6.167	318	4.54	11.804	44.038	13	654	21	0.144339	0.243744	0.00580176	0.676581	1.23418	4.44518	2
466	19_IC_0881-sil	BG_2d	54	28	273	811	2897	209	8	55	62	7.75	393	3.632	27.694	36.774	16	900	22	0.112564	0.254493	0.00608811	0.83478	1.22872	4.83442	2
467	19_IC_0882-sil	BG_2d	51	29	153	688	1644	164	5	42	38	7.6	285	4.086	15.89	32.234	12	419	17	0.124185	0.232604	0.0051674	0.769291	1.21852	5.03089	3
468	19_IC_0883-sil	BG_2d	46	28	172	754	1564	172	4	44	43	10.75	307	3.178	14.074	43.584	15	534	17	0.139097	0.224868	0.00469163	0.667216	1.25939	4.47132	3
469	19_IC_0884-sil	BG_2d	58	33	152	578	1527	166	7	33	38	5.429	254	3.178	7.264	35.866	11	354	17	0.137877	0.285436	0.00782819	0.696749	1.22787	4.28401	5
470	19_IC_0885-sil	BG_2d	68	36	119	507	1561	170	6	25	26	4.333	214	3.632	14.528	35.412	11	219	18	0.120004	0.321335	0.00838326	0.676709	1.2071	5.12301	5
471	19_IC_0886-sil	BG_2d	59	30	177	654	1605	182	5	46	51	10.2	293	4.54	12.258	39.044	12	468	19	0.146833	0.270974	0.00657709	0.609987	1.21166	4.75453	2
472	19_IC_0887-sil	BG_2d	55	29	193	631	1508	160	6	46	48	8	304	4.086	19.068	31.326	16	553	18	0.164903	0.248159	0.00747137	0.735758	1.24675	3.84773	3
473	19_IC_0888-sil	BG_2d	54	29	170	736	1528	159	6	45	45	7.5	308	3.178	11.804	31.326	13	489	18	0.146775	0.211463	0.00497797	0.758251	1.22039	3.86588	3
474	19_IC_0889-sil	BG_2d	65	33	112	513	1144	142	8	31	33	4.125	215	3.178	8.626	29.51	10	349	16	0.154661	0.26752	0.00787665	0.711797	1.22355	3.74098	5
475	19_IC_0890-sil	BG_2d	51	28	133	568	1278	143	6	25	31	5.167	230	3.632	12.712	30.872	11	300	18	0.144233	0.245436	0.00677974	0.780238	1.23888	3.98414	5
476	19_IC_0891-sil	BG_2d	76	35	164	513	1491	163	8	37	37	4.625	249	4.086	8.172	33.596	10	312	17	0.161467	0.30941	0.0108458	0.701551	1.23242	4.47365	5
477	19_IC_0892-sil	BG_2d	66	33	193	658	1432	156	5	40	41	8.2	301	3.632	14.074	32.688	19	542	17	0.18133	0.229815	0.00710573	0.742053	1.24534	3.08186	3
478	19_IC_0893-sil	BG_2d	51	29	203	762	2068	183	8	38	43	5.375	326	2.724	10.442	33.596	16	498	18	0.122485	0.239053	0.00540529	0.772388	1.22463	5.10802	3
479	19_IC_0894-sil	BG_2d	61	33	154	579	1156	143	5	39	40	8	254	3.178	14.074	28.148	15	266	16	0.186339	0.238546	0.00752863	0.710066	1.25832	3.47906	5
480	19_IC_0895-sil	BG_2d	55	30	323	1050	2709	204	7	81	73	10.429	503	2.724	16.798	37.228	18	746	21	0.139498	0.194762	0.00431718	0.815634	1.26567	3.8914	1
481	19_IC_0896-sil	BG_2d	56	29	238	843	1835	179	8	49	48	6	375	3.632	11.804	35.866	16	532	19	0.160326	0.211035	0.00514537	0.720639	1.27666	3.28173	3
482	19_IC_0897-sil	BG_2d	61	30	208	773	1922	175	6	53	53	8.833	347	4.54	14.528	35.412	14	583	19	0.140053	0.22152	0.00543172	0.790564	1.25824	3.70458	3
483	19_IC_0898-sil	BG_2d	59	29	183	681	1970	180	5	27	32	6.4	289	3.632	17.252	35.412	14	442	22	0.122661	0.259405	0.00630837	0.764053	1.18677	4.57719	4
484	19_IC_0899-sil	BG_2d	65	32	175	699	1399	151	5	39	39	7.8	301	4.086	18.614	27.694	15	490	17	0.171621	0.209714	0.00582379	0.771586	1.23488	3.04166	3
485	19_IC_0900-sil	BG_2d	48	27	154	501	1250	139	4	35	35	8.75	230	3.632	13.62	25.878	13	276	16	0.161612	0.27096	0.00959471	0.808722	1.25697	3.23412	5
486	19_IC_0901-sil	BG_2d	47	26	156	684	1446	160	6	42	41	6.833	284	4.086	11.804	35.412	12	370	17	0.140247	0.232137	0.00536123	0.709573	1.22353	5.32648	3
487	19_IC_0902-sil	BG_2d	47	29	189	700	1663	170	4	49	42	10.5	323	3.632	18.614	40.86	13	467	17	0.142419	0.237656	0.00578414	0.719181	1.2053	3.80495	3
488	20_IC_0922-sil	BG_2d	46	26	258	992	1787	175	5	95	74	14.8	469	3.632	19.068	37.682	21	729	18	0.170154	0.173736	0.00377533	0.735035	1.31153	3.17442	1
489	20_IC_0923-sil	BG_2d	45	26	230	943	2579	206	5	60	58	11.6	412	3.632	13.166	37.682	15	542	20	0.106388	0.214185	0.00374009	0.766137	1.22875	4.55836	2
490	20_IC_0924-sil	BG_2d	62	31	199	663	1888	175	4	53	50	12.5	325	4.086	17.706	35.866	17	604	19	0.138251	0.257969	0.007163	0.778661	1.23045	4.04924	2
491	20_IC_0925-sil	BG_2d	49	27	316	737	1766	165	5	71	59	11.8	408	3.178	14.528	33.142	17	520	19	0.206749	0.222427	0.00835683	0.816912	1.25538	2.76659	2
492	20_IC_0926-sil	BG_2d	52	28	264	935	2565	200	5	55	51	10.2	419	3.632	12.712	42.676	14	971	24	0.123339	0.21093	0.00443172	0.807806	1.22603	4.23084	2
493	20_IC_0927-sil	BG_2d	48	27	159	701	1738	161	5	36	37	7.4	289	3.632	15.89	28.602	14	304	18	0.119423	0.224612	0.00506608	0.840806	1.22904	4.22113	3
494	20_IC_0928-sil	BG_2d	57	30	171	590	1224	141	7	44	45	6.429	275	3.178	13.62	26.332	12	395	16	0.186441	0.235855	0.00802643	0.773912	1.26642	2.98431	5
495	20_IC_0929-sil	BG_2d	58	32	193	848	1721	173	6	58	44	7.333	364	2.724	12.712	34.504	13	527	19	0.145744	0.199529	0.00418502	0.721128	1.26028	3.48916	3
496	20_IC_0930-sil	BG_2d	47	40	155	811	1969	184	6	37	34	5.667	318	2.724	12.258	41.314	12	460	21	0.102648	0.219537	0.00362996	0.733612	1.22728	6.04756	3
497	20_IC_0931-sil	BG_2d	56	30	219	965	2515	199	5	62	55	11	397	4.086	19.068	42.676	18	593	21	0.109449	0.202498	0.00359471	0.801242	1.23823	5.09482	2
498	20_IC_0932-sil	BG_2d	60	31	239	775	1764	183	7	61	60	8.571	369	3.632	14.982	41.314	12	711	20	0.169048	0.233722	0.00614537	0.665374	1.25714	3.73293	2
499	20_IC_0933-sil	BG_2d	70	33	264	792	1780	164	10	52	53	5.3	380	3.632	10.442	30.872	15	386	17	0.18778	0.205339	0.00657269	0.83022	1.31672	2.5216	1
500	20_IC_0934-sil	BG_2d	55	29	207	876	2208	189	7	46	40	5.714	367	4.086	8.172	39.498	12	527	21	0.118705	0.214894	0.00424229	0.774229	1.22866	4.33378	3
501	20_IC_0935-sil	BG_2d	58	33	156	667	1423	158	5	37	33	6.6	276	2.724	17.706	33.142	13	385	17	0.150449	0.230211	0.00567841	0.712167	1.2487	3.68666	3
502	20_IC_0937-sil	BG_2d	49	28	288	889	2200	190	5	77	71	14.2	443	4.086	17.706	38.136	16	703	21	0.153295	0.211546	0.00522907	0.762207	1.24794	3.31049	2
503	20_IC_0938-sil	BG_2d	53	29	250	808	1732	183	9	54	47	5.222	380	3.632	14.528	37.682	18	530	19	0.17478	0.222436	0.00560793	0.648608	1.25952	4.01703	2
504	20_IC_0939-sil	BG_2d	54	29	171	703	1932	178	5	33	36	7.2	286	4.086	20.43	38.136	11	451	21	0.116819	0.247313	0.00550661	0.770476	1.22981	4.79556	4
505	20_IC_0940-sil	BG_2d	45	27	204	674	1494	151	6	40	43	7.167	303	3.632	15.436	30.418	15	306	17	0.166656	0.22067	0.00670485	0.826211	1.24861	3.00813	3
506	20_IC_0941-sil	BG_2d	64	31	390	1238	2501	211	10	122	101	10.1	625	4.086	16.798	42.676	23	1002	20	0.1817	0.169775	0.00370925	0.708163	1.35364	2.90652	1
507	20_IC_0942-sil	BG_2d	58	30	221	869	2180	188	6	59	57	9.5	382	4.086	15.89	37.682	13	592	19	0.128269	0.211696	0.00444934	0.773648	1.25524	4.75539	2
508	20_IC_0944-sil	BG_2d	46	27	148	623	1563	155	6	25	31	5.167	249	3.178	17.252	31.78	13	259	17	0.123595	0.246132	0.00610132	0.814727	1.18897	3.92736	5
509	20_IC_0945-sil	BG_2d	62	31	174	575	1443	161	4	39	35	8.75	275	3.632	11.35	33.596	15	335	17	0.163555	0.271128	0.0084185	0.70004	1.22051	4.41847	3
510	20_IC_0946-sil	BG_2d	36	23	228	818	1849	173	7	48	46	6.571	369	2.724	17.252	32.688	16	541	18	0.143044	0.212273	0.00501762	0.778802	1.25924	3.75554	3
511	20_IC_0947-sil	BG_2d	57	30	239	948	2281	183	5	42	42	8.4	392	4.54	19.976	39.952	15	484	20	0.129678	0.191916	0.0040793	0.85411	1.2271	3.41073	2
512	20_IC_0948-sil	BG_2d	57	32	350	1087	2744	217	8	87	77	9.625	538	3.178	17.706	45.854	16	936	23	0.148339	0.198013	0.0042511	0.730643	1.27254	4.82542	1
513	20_IC_0949-sil	BG_2d	55	28	285	796	2360	204	6	69	64	10.667	409	3.632	22.246	41.768	15	764	22	0.14374	0.253604	0.00661233	0.715383	1.23837	4.08971	2
514	20_IC_0951-sil	BG_2d	53	28	224	694	1597	161	6	52	51	8.5	342	3.632	15.436	31.78	18	690	18	0.173216	0.227595	0.00691189	0.770507	1.28223	2.52724	3
515	21_IC_0968-sil	BG_2d	58	29	243	729	1852	183	6	59	53	8.833	363	4.086	9.534	41.314	16	597	18	0.162423	0.245802	0.00684141	0.697115	1.2471	3.64011	2
516	21_IC_0969-sil	BG_2d	50	29	134	642	1555	162	4	31	34	8.5	264	3.632	15.89	31.326	21	362	17	0.118762	0.247313	0.0054185	0.745749	1.20585	5.23133	3
517	21_IC_0970-sil	BG_2d	54	30	367	1173	3356	234	5	103	85	17	569	4.086	19.976	45.4	17	1356	25	0.125612	0.197361	0.0037533	0.766969	1.27882	5.15117	1
518	21_IC_0971-sil	BG_2d	52	28	299	976	2132	182	4	59	62	15.5	452	4.086	17.706	41.314	19	676	19	0.164392	0.184344	0.0045022	0.80626	1.2803	2.87345	2
519	21_IC_0972-sil	BG_2d	46	27	255	841	1609	162	5	65	54	10.8	398	3.178	11.35	33.142	16	606	16	0.187225	0.191432	0.00526432	0.767392	1.25707	3.05016	2
520	21_IC_0973-sil	BG_2d	61	30	323	1013	2302	195	6	69	56	9.333	477	4.54	14.528	37.228	16	766	21	0.166789	0.19204	0.00467841	0.760797	1.28471	3.05167	1
521	21_IC_0974-sil	BG_2d	73	33	268	855	2141	192	5	71	60	12	417	4.994	15.89	39.498	17	457	19	0.159057	0.220599	0.00564758	0.729648	1.25838	3.59628	2
522	21_IC_0975-sil	BG_2d	64	34	398	1115	2787	219	7	100	91	13	570	3.632	24.516	43.584	17	1013	21	0.165639	0.195542	0.00462115	0.729969	1.28154	4.12661	1
523	21_IC_0976-sil	BG_2d	46	28	139	578	1572	158	5	24	29	5.8	231	4.086	10.442	33.596	9	347	19	0.117833	0.267537	0.00663436	0.786709	1.17099	4.47216	4
524	21_IC_0977-sil	BG_2d	49	29	212	821	1842	175	6	53	50	8.333	369	3.178	14.074	34.05	16	455	18	0.141771	0.207128	0.00457269	0.751802	1.27361	4.16253	3
525	21_IC_0978-sil	BG_2d	56	30	253	1106	2347	202	7	82	74	10.571	479	4.086	13.166	42.676	16	806	21	0.131912	0.181449	0.00312335	0.719335	1.29042	4.61001	1
526	21_IC_0981-sil	BG_2d	64	32	189	726	1915	172	6	46	38	6.333	315	4.994	17.706	33.142	12	584	20	0.131661	0.233251	0.00580617	0.810833	1.23645	4.71131	3
527	21_IC_0982-sil	BG_2d	44	25	207	648	1527	155	7	49	43	6.143	311	3.178	17.252	28.148	13	456	16	0.164401	0.236374	0.00737445	0.802846	1.24267	3.33152	3
528	21_IC_0983-sil	BG_2d	57	29	238	1027	2319	200	6	68	74	12.333	435	3.632	19.976	40.406	16	791	20	0.127172	0.192533	0.00342731	0.726952	1.27284	5.27623	1
529	21_IC_0984-sil	BG_2d	48	28	281	945	2190	193	6	80	65	10.833	460	3.632	10.896	37.228	18	632	19	0.150291	0.201137	0.00449339	0.739269	1.27425	4.47794	2
530	21_IC_0985-sil	BG_2d	53	30	225	859	2157	180	6	50	56	9.333	371	3.632	14.982	34.504	13	536	20	0.129128	0.208934	0.00469163	0.832251	1.22614	4.16996	2
531	21_IC_0986-sil	BG_2d	52	31	191	770	1557	164	5	52	50	10	329	3.632	10.896	32.688	12	469	17	0.156216	0.211943	0.0050837	0.724507	1.26294	3.64976	3
532	21_IC_0987-sil	BG_2d	52	32	286	983	2035	181	7	71	56	8	459	4.54	20.43	32.688	17	597	18	0.166031	0.181445	0.00428194	0.783137	1.28491	3.07544	1
533	21_IC_0988-sil	BG_2d	59	30	290	1071	2549	209	5	77	71	14.2	480	3.632	18.614	38.59	20	754	20	0.136771	0.19174	0.00370044	0.736075	1.26255	3.65661	1
534	21_IC_0991-sil	BG_2d	47	27	217	766	1921	178	5	45	46	9.2	352	3.632	10.896	47.216	14	582	21	0.13733	0.228256	0.00548018	0.765974	1.22463	3.51874	4
535	21_IC_0992-sil	BG_2d	50	27	269	990	2382	191	8	70	66	8.25	455	3.632	10.442	40.406	15	591	21	0.133877	0.192379	0.00405286	0.81759	1.26701	3.75986	1
536	21_IC_0993-sil	BG_2d	48	28	275	988	2245	189	6	64	70	11.667	450	4.086	17.252	39.044	16	838	19	0.143634	0.188775	0.00403084	0.787273	1.26181	3.75235	2
537	21_IC_0996-sil	BG_2d	59	31	233	889	1933	176	6	51	49	8.167	379	3.632	9.08	35.866	14	436	18	0.150907	0.1957	0.00454626	0.786736	1.29361	3.22821	3
538	21_IC_0997-sil	BG_2d	48	27	158	542	1404	169	6	36	38	6.333	250	3.632	19.522	36.32	10	451	20	0.146304	0.301542	0.0082511	0.620181	1.18164	4.23527	5
539	21_IC_0998-sil	BG_2d	51	27	311	970	2553	204	6	70	65	10.833	467	3.632	18.614	46.762	17	996	24	0.14185	0.209159	0.00477093	0.768753	1.26169	4.08242	1

## Sheet: acute_cortex_comparison
Statistical comparison between experimental groups in acute design, cortex region
parameter	PBS-LPS_3h	PBS-LPS_1d	PBS-LPS_2d	PBS-BG_3h	PBS-BG_1d	PBS-BG_2d	LPS_3h-BG_3h	LPS_1d-BG_1d	LPS_2d-BG_2d
soma area	0.9852	0.1088	0.0097	0.5508	0.1859	0.3858	0.5348	0.5623	0.0168
soma perimeter	0.5275	0.4834	0.0576	0.0222	0.7447	0.311	0.1761	0.4292	0.0419
branch area	0.4627	0.5894	0.0212	0.3431	0.8185	0.38	0.1443	0.724	0.1712
branch perimeter	0.0605	0.1378	0.4699	0.2768	0.5505	0.4722	0.9962	0.2193	0.7986
brand index	0.4474	0.4412	0.7419	0.3292	0.6518	0.6469	0.6469	0.6469	0.6469
convex area	0.8145	0.1958	0.0442	0.2305	0.8922	0.8096	0.2567	0.1991	0.2206
convex perimeter	0.7003	0.2113	0.0562	0.3513	0.6721	0.7993	0.3066	0.1728	0.1539
startnodes	0.5815	0.0313	0.0038	0.6719	0.5735	0.9932	0.2573	0.0006	0.0008
junctions	0.6328	0.5793	0.03	0.3767	0.739	0.8972	0.1754	0.4475	0.0215
endnodes	0.505	0.5518	0.0295	0.3851	0.7061	0.8605	0.135	0.4032	0.0179
end-to-startnode ratio	0.0726	0.3013	0.0034	0.0767	0.3614	0.8063	0.0095	0.8289	0.2083
total branch length	0.6969	0.6676	0.1622	0.3426	0.9151	0.9915	0.376	0.7428	0.2704
Sholl min radius	0.5742	0.7753	0.9604	0.8089	0.801	0.5301	0.6434	0.9686	0.5886
Sholl peak radius	0.419	0.0872	0.0031	0.3946	0.4614	0.9882	0.1046	0.162	0.0022
Sholl max radius	0.4868	0.1657	0.0041	0.2234	0.897	0.5047	0.1492	0.1337	0.103
Sholl peak	0.6504	0.9028	0.0429	0.9212	0.9655	0.4536	0.7405	0.8787	0.0468
cell spread	0.4456	0.0772	0	0.138	0.6099	0.3304	0.1235	0.0834	0.0104
cell solidity	0.7223	0.0119	0.003	0.9349	0.7104	0.1348	0.5303	0.0124	0
cell convexity	0.1118	0.1042	0.9235	0.3779	0.4005	0.3883	0.3362	0.2354	0.2925
cell circularity	0	0.0042	0.0039	0.2062	0.0146	0.0662	0.1159	0.0086	0.2449
convex circularity	0.3913	0.6083	0.576	0.3811	0.3284	0.8907	0.9828	0.8325	0.6323
fractal dimension	0.9463	0.7465	0.089	0.545	0.7686	0.7413	0.4621	0.4747	0.0261
lacunarity	0.7628	0.0497	0.009	0.6183	0.7132	0.2775	0.8926	0.0352	0
*Significance is determined by type II Wald chi-square tests for linear mixed models
p > 0.05
0.01 < p < 0.05	*
0.001 < p < 0.01	**
p < 0.001	***

## Sheet: acute_hippo
Raw morphometric information for all cells analyzed in acute design, hippocampus region
	cell_ID	treatment	soma area (µm2)	soma perimeter (µm)	branch area (µm2)	branch perimeter (µm)	convex area (µm2)	convex perimeter (µm)	startnodes (n)	junctions (n)	endnodes (n)	end-to-startnode ratio	total branch length (µm)	Sholl min radius (µm)	Sholl peak radius (µm)	Sholl max radius (µm)	Sholl peak (n)	branching index (µm)	cell spread (µm)	cell solidity	cell convexity	cell circularity	convex circularity	fractal dimension	lacunarity	groups
1	01_CA_0026-sil	PBS_3h	62	31	308	1209	2749	208	7	103	88	12.571	547	4.086	27.694	40.86	17	1174	22	0.1347	0.170445	0.00311894	0.797344	1.24996	3.83631	1
2	01_CA_0027-sil	PBS_3h	57	29	210	874	2187	190	6	56	52	8.667	380	4.086	18.16	36.774	15	805	19	0.122084	0.213502	0.00422907	0.759555	1.24199	3.96085	2
3	01_CA_0028-sil	PBS_3h	65	31	202	987	2011	180	4	72	68	17	416	3.632	14.074	37.682	17	738	19	0.132863	0.179167	0.00332599	0.779841	1.25007	4.4434	2
4	01_CA_0029-sil	PBS_3h	55	28	213	785	1843	182	6	51	53	8.833	343	4.086	8.172	34.05	13	454	18	0.145767	0.228907	0.00532599	0.697106	1.2474	5.20058	5
5	01_CA_0030-sil	PBS_3h	52	27	238	959	2284	198	5	62	61	12.2	418	4.54	18.614	37.682	14	621	22	0.127101	0.202132	0.00380176	0.732432	1.24639	4.0224	2
6	01_CA_0031-sil	PBS_3h	52	29	233	832	2018	189	3	64	63	21	385	4.086	19.522	42.222	14	1099	22	0.141141	0.221956	0.00495595	0.712718	1.24608	4.33277	2
7	01_CA_0032-sil	PBS_3h	66	32	235	895	1839	173	6	55	52	8.667	392	4.994	17.252	34.958	16	740	22	0.163546	0.189009	0.00453744	0.77648	1.28457	3.46054	4
8	01_CA_0033-sil	PBS_3h	52	27	234	858	1934	174	4	72	58	14.5	407	4.086	18.614	30.872	18	617	20	0.148163	0.198493	0.00470485	0.806084	1.24652	3.23005	3
9	01_CA_0034-sil	PBS_3h	63	30	277	1232	3011	214	6	95	88	14.667	528	3.632	18.16	36.32	19	1029	20	0.112771	0.171432	0.0027489	0.829185	1.26108	4.84474	1
10	01_CA_0035-sil	PBS_3h	44	25	186	893	2653	230	5	51	48	9.6	360	3.632	13.62	44.946	15	929	22	0.086467	0.251617	0.00345815	0.631753	1.20397	6.40927	2
11	01_CA_0036-sil	PBS_3h	50	27	210	815	1662	166	5	58	51	10.2	359	3.632	11.35	36.32	12	498	19	0.156529	0.200934	0.00479295	0.758551	1.26098	4.04708	3
12	01_CA_0037-sil	PBS_3h	55	29	191	858	2104	193	6	54	53	8.833	366	4.086	23.154	44.038	16	626	19	0.116894	0.220062	0.00403084	0.711705	1.24684	6.34623	2
13	01_CA_0038-sil	PBS_3h	55	31	215	838	1668	175	6	76	65	10.833	395	3.178	14.074	49.94	11	1191	24	0.162044	0.204943	0.00465639	0.684379	1.2651	4.25773	6
14	01_CA_0039-sil	PBS_3h	57	30	252	1162	2640	202	5	79	69	13.8	488	4.086	25.878	42.676	19	1042	22	0.11685	0.171282	0.00277974	0.811031	1.24281	4.12653	2
15	01_CA_0040-sil	PBS_3h	58	30	217	820	1893	180	6	61	55	9.167	370	4.086	19.522	37.682	18	576	19	0.145683	0.217559	0.00506167	0.733982	1.27949	3.71957	4
16	02_CA_0067-sil	PBS_3h	43	26	240	925	1980	176	5	80	72	14.4	427	3.632	14.982	37.682	12	797	22	0.142899	0.188683	0.00407048	0.799969	1.2662	3.99764	3
17	02_CA_0068-sil	PBS_3h	59	30	252	904	1923	184	6	64	58	9.667	410	3.178	14.528	36.774	18	551	19	0.161427	0.201088	0.00464317	0.71122	1.28667	3.20639	4
18	02_CA_0069-sil	PBS_3h	63	31	227	764	2015	193	5	55	48	9.6	353	4.086	13.62	44.038	13	748	21	0.143982	0.25222	0.00619824	0.676789	1.24032	4.1944	6
19	02_CA_0071-sil	PBS_3h	75	35	248	836	1842	182	8	53	54	6.75	373	4.54	8.172	38.136	14	741	21	0.175013	0.214229	0.00562115	0.7	1.2633	3.77847	4
20	02_CA_0072-sil	PBS_3h	66	32	247	871	2147	204	4	65	57	14.25	404	4.086	10.896	46.762	13	469	20	0.145771	0.229806	0.00498678	0.647987	1.25539	4.60246	6
21	02_CA_0073-sil	PBS_3h	62	32	188	751	1245	160	9	49	53	5.889	323	3.632	13.166	39.044	16	441	16	0.200903	0.211678	0.00546696	0.607542	1.287	2.4473	6
22	02_CA_0074-sil	PBS_3h	46	26	226	750	1721	178	5	72	59	11.8	370	4.086	8.172	35.412	16	528	17	0.158141	0.233907	0.00589427	0.680987	1.2952	4.3009	3
23	02_CA_0075-sil	PBS_3h	52	27	210	802	1662	170	7	46	48	6.857	346	3.632	14.528	37.682	15	501	18	0.157388	0.208181	0.00494273	0.724374	1.29638	4.43283	3
24	02_CA_0076-sil	PBS_3h	44	25	254	1096	2331	199	6	81	63	10.5	471	3.632	16.798	40.86	18	703	19	0.128	0.178811	0.00303084	0.740626	1.27812	5.15589	1
25	02_CA_0077-sil	PBS_3h	47	25	193	883	2124	188	6	48	54	9	365	3.632	10.896	36.774	15	474	17	0.112982	0.208577	0.00372247	0.757498	1.23519	5.25867	3
26	02_CA_0078-sil	PBS_3h	47	26	190	865	2501	197	4	52	51	12.75	362	3.632	22.7	35.412	15	577	21	0.0947533	0.224031	0.00385903	0.811419	1.21081	5.15313	2
27	02_CA_0080-sil	PBS_3h	43	26	206	699	1622	175	6	43	45	7.5	324	2.724	16.344	36.32	11	461	21	0.153639	0.246401	0.00622467	0.667128	1.24934	3.91228	3
28	03_CA_0113-sil	PBS_3h	55	28	217	690	1725	173	6	44	48	8	326	4.54	12.712	34.05	13	413	19	0.157533	0.246833	0.00699119	0.728507	1.24385	3.97125	5
29	03_CA_0114-sil	PBS_3h	41	25	136	588	1383	154	5	45	42	8.4	251	3.178	14.074	37.682	13	250	15	0.128256	0.259656	0.00632599	0.731485	1.23947	4.87639	5
30	03_CA_0115-sil	PBS_3h	52	31	169	862	1857	172	6	51	52	8.667	347	2.724	16.798	37.228	15	568	18	0.119405	0.195449	0.00361233	0.792348	1.22692	4.35718	3
31	03_CA_0117-sil	PBS_3h	40	24	154	829	1863	174	5	41	44	8.8	313	3.178	18.614	32.688	12	534	19	0.104295	0.207176	0.00344934	0.770145	1.21615	5.79249	3
32	03_CA_0118-sil	PBS_3h	44	25	162	774	1859	179	5	39	42	8.4	306	3.632	9.988	39.498	13	441	18	0.110833	0.229581	0.00427753	0.731885	1.2158	4.8937	3
33	03_CA_0120-sil	PBS_3h	54	29	204	826	1960	185	8	42	45	5.625	350	3.178	11.804	41.314	13	493	16	0.13185	0.22048	0.00459912	0.717683	1.23481	4.20796	5
34	03_CA_0121-sil	PBS_3h	49	29	148	784	1610	168	6	37	37	6.167	293	2.27	14.074	34.504	13	355	19	0.122458	0.212172	0.00396035	0.718722	1.23283	3.81777	5
35	03_CA_0122-sil	PBS_3h	59	30	205	808	2092	187	4	57	49	12.25	360	4.086	19.522	42.222	13	609	22	0.125965	0.226185	0.00484141	0.751379	1.22401	4.76647	2
36	03_CA_0123-sil	PBS_3h	44	25	300	1125	2683	217	5	78	64	12.8	511	3.178	14.074	58.112	16	800	20	0.128295	0.190771	0.00334802	0.717515	1.27482	4.56748	1
37	03_CA_0124-sil	PBS_3h	59	30	251	902	1860	168	4	73	65	16.25	421	4.086	14.528	30.418	18	535	18	0.166612	0.182269	0.00460793	0.832828	1.25918	3.12161	3
38	03_CA_0125-sil	PBS_3h	55	28	245	813	1752	167	7	62	59	8.429	383	3.178	18.16	28.602	15	532	18	0.170837	0.203533	0.00556828	0.786806	1.24907	2.98021	3
39	03_CA_0126-sil	PBS_3h	48	27	257	878	2634	206	2	63	61	30.5	411	3.178	27.24	35.412	17	943	23	0.116119	0.230163	0.00479295	0.779044	1.23302	4.90799	2
40	03_CA_0127-sil	PBS_3h	47	26	289	1040	2304	192	5	87	80	16	489	4.086	15.436	38.59	18	972	21	0.146022	0.183634	0.00386344	0.785044	1.28469	3.44494	1
41	03_CA_0128-sil	PBS_3h	68	31	280	881	1809	185	6	68	60	10	425	4.086	10.896	40.86	15	604	20	0.192286	0.20863	0.00553304	0.660974	1.29313	3.57171	6
42	03_CA_0132-sil	PBS_3h	45	26	210	800	2040	183	6	53	52	8.667	355	3.632	8.172	34.958	11	482	21	0.124956	0.225427	0.00487225	0.767568	1.25021	4.03512	3
43	04_CA_0162-sil	LPS_3h	44	26	297	846	2363	190	7	65	62	8.857	419	2.724	19.522	39.044	15	771	19	0.144568	0.223141	0.00594714	0.826445	1.25965	3.79911	3
44	04_CA_0163-sil	LPS_3h	54	29	193	726	1556	165	5	53	57	11.4	329	3.632	9.534	30.872	13	553	18	0.158489	0.22185	0.00560352	0.718132	1.23869	3.99931	5
45	04_CA_0165-sil	LPS_3h	38	23	167	550	1298	147	8	28	28	3.5	247	2.724	10.442	33.596	14	331	16	0.158026	0.267881	0.00854626	0.753736	1.22586	2.958	5
46	04_CA_0166-sil	LPS_3h	51	29	186	723	1752	180	5	49	50	10	318	4.086	17.252	38.136	15	515	16	0.135119	0.24474	0.00552423	0.682705	1.22805	4.91939	5
47	04_CA_0168-sil	LPS_3h	54	28	238	804	2148	192	7	56	63	9	368	3.632	17.706	40.406	13	560	21	0.135991	0.239278	0.00567401	0.728604	1.22667	5.08791	3
48	05_CA_0196-sil	LPS_3h	41	26	206	833	1792	173	4	52	52	13	360	3.178	14.528	38.136	16	553	19	0.137634	0.204295	0.0043348	0.754542	1.25208	3.38326	3
49	05_CA_0197-sil	LPS_3h	55	31	153	602	2103	183	4	44	44	11	267	3.632	18.16	36.32	12	542	20	0.0988546	0.291502	0.00663436	0.789551	1.17804	5.3717	5
50	05_CA_0198-sil	LPS_3h	37	23	221	859	1988	180	6	56	54	9	379	2.724	19.976	37.228	13	645	19	0.129352	0.20752	0.00427313	0.767176	1.25125	3.51601	3
51	05_CA_0200-sil	LPS_3h	54	28	176	729	1943	183	6	47	51	8.5	314	4.086	17.706	40.86	11	721	23	0.118018	0.246247	0.0052467	0.733181	1.21303	4.98549	2
52	05_CA_0201-sil	LPS_3h	48	28	155	711	1971	186	4	31	30	7.5	287	3.178	11.804	41.768	11	532	23	0.103141	0.254652	0.00477093	0.71307	1.19647	5.58319	5
53	05_CA_0203-sil	LPS_3h	45	27	120	549	1334	152	3	36	29	9.667	226	4.086	28.148	32.688	9	466	20	0.123529	0.264009	0.00625991	0.726899	1.19829	4.91145	5
54	05_CA_0204-sil	LPS_3h	58	31	175	734	1346	142	5	65	61	12.2	331	3.632	12.258	27.694	18	428	16	0.173405	0.189198	0.00518062	0.834863	1.26682	3.31458	6
55	05_CA_0205-sil	LPS_3h	65	33	219	911	1963	183	6	70	58	9.667	396	3.178	15.436	38.59	15	646	21	0.144568	0.1973	0.0041674	0.740665	1.24205	4.03523	2
56	05_CA_0206-sil	LPS_3h	48	28	180	837	1572	165	5	57	54	10.8	347	3.178	11.804	38.59	14	783	21	0.144872	0.194859	0.00397797	0.723419	1.22884	4.17338	3
57	05_CA_0207-sil	LPS_3h	58	31	155	686	1475	158	5	40	42	8.4	288	4.54	11.35	37.682	13	464	18	0.144088	0.222436	0.00532159	0.746749	1.26003	4.36803	5
58	05_CA_0209-sil	LPS_3h	43	25	178	648	1600	165	8	44	33	4.125	288	3.178	16.798	34.05	13	470	17	0.137863	0.252696	0.00651982	0.740524	1.21753	4.68773	5
59	05_CA_0210-sil	LPS_3h	46	25	241	952	1622	170	6	94	66	11	443	3.632	19.068	37.682	18	817	22	0.177035	0.177445	0.00392952	0.70515	1.29874	3.24951	3
60	05_CA_0211-sil	LPS_3h	58	31	185	726	1655	163	5	58	60	12	327	3.178	16.344	30.872	15	489	17	0.146934	0.218894	0.00554185	0.787088	1.26149	3.74715	3
61	05_CA_0212-sil	LPS_3h	70	34	176	703	1753	185	6	55	53	8.833	311	4.086	9.988	42.222	10	650	21	0.140194	0.256943	0.00597357	0.645278	1.24587	4.68694	6
62	05_CA_0213-sil	LPS_3h	46	27	171	769	1762	169	4	46	47	11.75	314	3.178	12.258	34.05	12	511	18	0.12341	0.215753	0.00444493	0.774031	1.21303	3.87832	3
63	05_CA_0214-sil	LPS_3h	54	28	209	813	2199	191	5	47	52	10.4	352	4.086	19.976	40.86	12	873	23	0.119722	0.229947	0.00481057	0.76	1.25498	5.04305	2
64	06_CA_0242-sil	LPS_3h	56	31	176	683	1749	181	7	48	45	6.429	301	3.178	15.89	37.228	13	444	18	0.13263	0.260599	0.00601762	0.668159	1.20409	4.71514	5
65	06_CA_0243-sil	LPS_3h	51	28	144	684	1214	139	8	38	42	5.25	277	3.178	10.896	24.516	16	371	15	0.160388	0.198833	0.00498238	0.78559	1.24823	2.93145	5
66	06_CA_0244-sil	LPS_3h	38	23	141	677	1895	181	4	34	36	9	266	3.632	12.712	35.866	11	380	18	0.094185	0.260458	0.00464758	0.727383	1.19987	5.72241	3
67	06_CA_0245-sil	LPS_3h	46	25	158	754	1639	160	4	50	51	12.75	314	3.178	14.982	30.872	16	364	18	0.124643	0.208211	0.00434802	0.804282	1.24623	3.77504	3
68	06_CA_0246-sil	LPS_3h	55	28	159	691	1908	178	5	36	37	7.4	280	3.632	10.896	46.762	10	545	22	0.112546	0.253555	0.00546256	0.755216	1.19565	5.20435	5
69	06_CA_0247-sil	LPS_3h	56	31	211	961	1829	178	6	78	72	12	414	2.724	16.344	36.774	15	736	19	0.146432	0.181797	0.0035022	0.723894	1.26966	4.06131	4
70	06_CA_0248-sil	LPS_3h	67	34	189	683	1365	151	6	61	63	10.5	325	4.086	10.442	36.32	12	562	19	0.187432	0.215996	0.00654626	0.748379	1.25013	3.10907	6
71	06_CA_0250-sil	LPS_3h	51	29	248	888	1994	185	6	94	75	12.5	426	4.086	24.062	35.412	13	732	20	0.150066	0.206286	0.00468722	0.734018	1.2742	4.22482	2
72	06_CA_0251-sil	LPS_3h	46	27	229	827	2029	188	4	72	63	15.75	388	3.632	14.528	38.59	14	647	19	0.135868	0.22448	0.00492952	0.720145	1.25954	4.45027	2
73	06_CA_0254-sil	LPS_3h	84	42	266	883	2322	194	6	69	68	11.333	426	5.902	15.89	48.578	12	903	26	0.150463	0.214771	0.00537445	0.77448	1.24497	3.46052	4
74	06_CA_0256-sil	LPS_3h	57	30	287	1108	2758	204	5	53	54	10.8	461	4.086	19.068	35.866	19	769	24	0.124872	0.181652	0.00344493	0.835859	1.23552	3.73169	2
75	06_CA_0259-sil	LPS_3h	54	33	148	649	1667	166	8	47	49	6.125	281	3.178	12.712	38.136	13	542	18	0.120789	0.250771	0.00576211	0.75859	1.20051	5.60492	5
76	06_CA_0260-sil	LPS_3h	48	27	129	524	1018	133	6	39	42	7	223	3.178	14.982	25.424	14	297	14	0.174344	0.249471	0.00779295	0.718194	1.24211	3.16111	5
77	06_CA_0261-sil	LPS_3h	59	33	196	679	1364	167	7	53	61	8.714	316	2.724	18.614	41.768	14	492	18	0.187278	0.240771	0.00664758	0.61237	1.26358	3.35369	6
78	06_CA_0262-sil	LPS_3h	47	26	106	451	972	135	7	26	32	4.571	183	3.632	13.166	27.24	9	216	16	0.15726	0.292841	0.00908811	0.673758	1.21469	4.10394	5
79	06_CA_0263-sil	LPS_3h	43	25	139	634	1302	152	5	32	32	6.4	258	3.632	8.626	29.964	13	355	16	0.140313	0.236352	0.00552423	0.70496	1.2482	3.95022	5
80	06_CA_0264-sil	LPS_3h	73	36	209	786	1615	163	4	63	52	13	355	4.54	14.982	37.228	14	474	20	0.174542	0.202943	0.00551101	0.766344	1.24803	3.43464	6
81	06_CA_0265-sil	LPS_3h	47	26	177	624	1476	157	4	39	39	9.75	284	4.086	15.436	33.142	14	370	17	0.151934	0.245379	0.0069163	0.75604	1.21698	3.67332	5
82	07_CA_0296-sil	LPS_1d	80	39	238	840	2396	202	6	71	73	12.167	405	3.632	17.706	44.492	15	908	20	0.132573	0.234612	0.00535683	0.734339	1.24491	4.83968	4
83	07_CA_0299-sil	LPS_1d	62	33	218	912	1909	177	8	108	88	11	443	3.178	20.43	30.872	16	710	18	0.146753	0.191551	0.00412335	0.765361	1.26462	5.01567	4
84	07_CA_0302-sil	LPS_1d	56	29	326	947	1767	184	5	106	98	19.6	492	4.54	12.712	39.952	19	667	17	0.216405	0.193736	0.0053348	0.656626	1.33004	3.17433	3
85	07_CA_0305-sil	LPS_1d	46	27	259	927	2637	219	5	80	76	15.2	429	4.086	16.798	45.4	15	880	22	0.115564	0.239502	0.0045859	0.692026	1.23714	5.59544	2
86	07_CA_0306-sil	LPS_1d	56	28	299	832	2009	181	7	73	63	9	424	4.54	17.252	35.412	15	528	18	0.177123	0.219828	0.00661674	0.773282	1.26167	3.12347	4
87	07_CA_0307-sil	LPS_1d	50	27	305	789	2089	195	6	69	63	10.5	406	3.632	12.258	36.32	16	701	19	0.169714	0.253233	0.00748018	0.687189	1.27504	3.7381	6
88	07_CA_0308-sil	LPS_1d	56	29	371	1007	2357	199	7	106	79	11.286	536	4.086	18.16	40.86	17	1160	20	0.181137	0.198863	0.00537885	0.750626	1.29265	2.85587	1
89	07_CA_0309-sil	LPS_1d	64	30	391	1134	2757	210	11	114	88	8	581	3.632	16.798	44.946	16	1258	21	0.165154	0.187476	0.00455947	0.785758	1.29364	4.08344	4
90	07_CA_0310-sil	LPS_1d	50	28	482	1106	2720	228	7	149	123	17.571	653	3.178	7.264	47.216	18	1392	22	0.195405	0.208784	0.00561674	0.65933	1.29804	3.77809	1
91	07_CA_0311-sil	LPS_1d	77	34	452	1174	2714	211	11	119	90	8.182	620	3.632	12.258	42.222	18	1063	21	0.19485	0.182441	0.00495154	0.7637	1.28283	3.14717	4
92	07_CA_0312-sil	LPS_1d	44	27	375	962	2228	220	6	99	84	14	518	3.178	17.252	51.756	19	1048	22	0.188119	0.231762	0.00584581	0.578744	1.30131	3.93767	1
93	07_CA_0313-sil	LPS_1d	50	27	306	828	2313	200	8	80	71	8.875	433	3.178	9.534	41.768	15	901	21	0.153841	0.246643	0.00678414	0.725044	1.27174	4.08749	6
94	07_CA_0315-sil	LPS_1d	48	27	422	1150	2562	209	7	131	105	15	627	3.632	19.068	44.946	19	1040	21	0.18352	0.184031	0.00456828	0.735018	1.28901	3.31618	1
95	07_CA_0318-sil	LPS_1d	71	33	477	1234	2615	211	7	136	109	15.571	674	3.632	19.068	40.86	23	1014	21	0.209604	0.170837	0.00451982	0.738921	1.31357	2.70733	1
96	07_CA_0319-sil	LPS_1d	58	31	312	986	2010	182	11	94	74	6.727	485	3.178	9.988	39.952	19	674	18	0.183916	0.188	0.00495154	0.762084	1.28779	3.0531	4
97	07_CA_0321-sil	LPS_1d	52	29	326	852	2474	213	6	74	62	10.333	449	3.178	13.62	45.854	17	535	19	0.153031	0.250198	0.00655507	0.68433	1.23567	4.81699	6
98	07_CA_0323-sil	LPS_1d	61	31	240	876	2178	183	5	74	71	14.2	411	4.086	16.798	36.32	18	755	19	0.138361	0.20526	0.00478855	0.821652	1.25126	3.89367	2
99	07_CA_0324-sil	LPS_1d	57	30	343	1151	2243	190	8	102	96	12	540	3.178	9.08	38.136	17	836	20	0.178586	0.166137	0.00385022	0.780722	1.3165	3.25334	1
100	08_CA_0359-sil	LPS_1d	62	33	248	774	1533	152	7	61	57	8.143	370	3.178	15.436	31.78	19	528	17	0.20263	0.197181	0.00654185	0.830163	1.28558	2.46901	6
101	08_CA_0360-sil	LPS_1d	41	24	236	841	1957	170	7	68	68	9.714	387	3.178	19.522	33.142	16	573	18	0.141445	0.203859	0.00498678	0.848304	1.24018	3.23546	3
102	08_CA_0361-sil	LPS_1d	63	31	267	676	1642	167	5	66	62	12.4	365	3.632	13.62	36.774	15	717	18	0.200877	0.245819	0.00899559	0.741225	1.25879	2.20541	6
103	08_CA_0362-sil	LPS_1d	60	30	217	695	1546	177	7	68	59	8.429	349	3.632	11.35	42.222	12	588	18	0.179335	0.251211	0.00704846	0.622938	1.25366	3.98327	6
104	08_CA_0363-sil	LPS_1d	60	31	323	906	2353	198	4	87	85	21.25	459	4.54	20.43	39.952	18	786	20	0.163013	0.218088	0.005837	0.752947	1.24927	3.68256	1
105	08_CA_0365-sil	LPS_1d	49	27	225	753	1982	178	5	48	49	9.8	346	3.178	11.804	35.412	16	582	19	0.138758	0.231885	0.00586784	0.786216	1.21989	4.24842	3
106	08_CA_0366-sil	LPS_1d	68	32	240	715	1645	162	8	66	62	7.75	361	3.632	18.16	37.682	16	452	16	0.186991	0.230498	0.00779736	0.784793	1.26936	3.38074	6
107	08_CA_0367-sil	LPS_1d	65	31	272	902	2298	191	7	70	73	10.429	414	3.632	13.62	39.044	17	709	20	0.14674	0.213198	0.00529956	0.794357	1.24643	3.58253	2
108	08_CA_0368-sil	LPS_1d	53	28	229	741	1377	147	6	68	53	8.833	365	3.632	10.896	34.05	16	384	16	0.204661	0.197868	0.00638767	0.797242	1.28176	2.58861	6
109	08_CA_0369-sil	LPS_1d	48	27	196	790	2240	193	5	46	52	10.4	340	3.178	13.166	42.676	11	625	20	0.109207	0.241819	0.00482819	0.756189	1.21029	5.39138	2
110	08_CA_0370-sil	LPS_1d	59	30	221	790	1889	182	8	62	58	7.25	365	3.632	23.608	38.136	14	735	21	0.148476	0.228793	0.0055815	0.718	1.25924	4.86796	2
111	08_CA_0372-sil	LPS_1d	45	25	189	790	1956	176	6	64	63	10.5	354	3.632	19.068	37.228	13	484	17	0.11937	0.220551	0.0045859	0.790057	1.23433	4.95278	3
112	08_CA_0373-sil	LPS_1d	45	24	168	676	1414	149	7	40	43	6.143	290	3.632	15.89	26.786	13	315	16	0.150308	0.216661	0.00562115	0.796709	1.25104	3.56584	5
113	08_CA_0374-sil	LPS_1d	56	29	289	772	1968	209	8	82	73	9.125	419	3.632	8.626	49.486	15	830	20	0.175405	0.273295	0.0074141	0.565802	1.24548	5.05315	6
114	08_CA_0375-sil	LPS_1d	41	24	254	850	1703	172	5	75	70	14	406	3.632	14.074	39.952	17	671	18	0.173225	0.204088	0.00520264	0.721048	1.32908	3.05512	3
115	08_CA_0376-sil	LPS_1d	56	28	327	1014	2098	191	8	94	88	11	507	3.632	21.338	36.774	17	839	19	0.182753	0.189652	0.00473128	0.719978	1.28412	2.97763	1
116	08_CA_0377-sil	LPS_1d	53	27	237	641	1344	144	6	50	47	7.833	315	3.632	14.982	26.332	15	341	14	0.216031	0.228419	0.00915859	0.812617	1.27933	2.15112	6
117	09_CA_0409-sil	LPS_1d	53	28	288	655	1969	185	7	69	67	9.571	363	4.086	9.988	48.578	11	811	21	0.173559	0.283374	0.0101233	0.726489	1.24655	3.92994	6
118	09_CA_0410-sil	LPS_1d	60	30	293	782	2148	186	8	74	66	8.25	406	3.632	22.7	40.406	14	711	20	0.164344	0.236943	0.0071674	0.777075	1.2584	3.71103	2
119	09_CA_0411-sil	LPS_1d	51	28	321	956	3016	231	5	97	86	17.2	494	3.178	9.08	45.4	13	1065	23	0.123419	0.240075	0.00507048	0.712551	1.247	5.42692	1
120	09_CA_0412-sil	LPS_1d	57	29	213	675	1764	168	8	61	56	7	322	4.086	19.976	32.688	12	451	19	0.152956	0.25	0.00755066	0.789683	1.22271	3.1187	5
121	09_CA_0413-sil	LPS_1d	50	27	168	508	1158	162	6	50	47	7.833	259	3.632	11.804	38.136	13	424	16	0.187956	0.313683	0.0102731	0.555388	1.27458	4.12289	5
122	09_CA_0415-sil	LPS_1d	57	28	257	686	1620	162	4	62	55	13.75	358	4.086	21.338	34.504	18	542	18	0.194018	0.234502	0.00824229	0.7727	1.25156	3.14856	6
123	09_CA_0416-sil	LPS_1d	46	25	234	875	2001	179	7	73	71	10.143	415	3.178	9.08	35.412	16	635	18	0.139859	0.201379	0.00444493	0.783731	1.27479	4.04814	3
124	09_CA_0417-sil	LPS_1d	53	28	221	1016	2254	191	6	71	66	11	424	3.178	22.7	36.774	16	676	20	0.121485	0.186476	0.00328194	0.777031	1.25116	4.34282	2
125	09_CA_0418-sil	LPS_1d	51	29	214	593	1187	141	6	56	52	8.667	303	3.178	17.252	28.602	15	425	17	0.223322	0.235718	0.00925551	0.746057	1.25981	2.54921	6
126	09_CA_0419-sil	LPS_1d	54	32	245	701	1522	172	10	80	64	6.4	368	2.724	8.626	40.406	15	598	18	0.19641	0.249013	0.00791189	0.649498	1.26164	3.93927	6
127	09_CA_0420-sil	LPS_1d	50	27	235	724	1505	157	7	61	60	8.571	353	2.724	15.89	29.056	18	576	16	0.189013	0.216048	0.00676211	0.766661	1.27492	2.89023	3
128	09_CA_0423-sil	LPS_1d	47	28	172	538	1301	148	6	46	43	7.167	258	2.724	13.62	27.694	13	324	16	0.168374	0.2763	0.00953304	0.741762	1.24574	3.61913	5
129	09_CA_0424-sil	LPS_1d	43	24	306	999	2208	202	6	75	67	11.167	467	3.632	14.528	38.136	14	847	20	0.158075	0.203991	0.00448018	0.681172	1.25918	4.23076	6
130	09_CA_0425-sil	LPS_1d	54	27	414	1229	2750	214	6	117	106	17.667	623	3.632	19.522	44.946	21	803	20	0.17015	0.174749	0.00391189	0.752696	1.28759	3.02922	1
131	10_CA_0457-sil	LPS_2d	94	38	280	979	1889	174	9	98	85	9.444	479	4.54	18.16	37.682	19	581	18	0.197921	0.178956	0.00496476	0.78311	1.32937	2.944	4
132	10_CA_0458-sil	LPS_2d	50	26	258	723	1540	159	8	63	55	6.875	366	3.178	8.172	37.682	15	555	16	0.200176	0.223925	0.00764758	0.761907	1.25884	3.12975	6
133	10_CA_0459-sil	LPS_2d	68	32	240	680	1459	155	7	80	66	9.429	364	3.632	9.534	29.056	14	536	16	0.210687	0.227877	0.00829515	0.758229	1.28642	2.79233	6
134	10_CA_0460-sil	LPS_2d	51	28	229	596	1560	165	7	65	54	7.714	329	3.632	10.896	34.504	12	548	19	0.179176	0.274828	0.00979736	0.723991	1.23054	3.34613	6
135	10_CA_0461-sil	LPS_2d	51	27	203	663	1291	163	10	58	57	5.7	322	3.178	6.356	37.228	15	535	18	0.196965	0.251573	0.00756828	0.60711	1.2488	3.06472	6
136	10_CA_0462-sil	LPS_2d	61	30	260	912	2171	190	8	71	77	9.625	418	3.632	15.436	43.13	16	833	20	0.147762	0.208097	0.00482379	0.753987	1.23007	3.699	2
137	10_CA_0463-sil	LPS_2d	72	32	176	586	1433	162	6	42	42	7	267	4.54	10.442	33.596	15	373	16	0.173088	0.278427	0.00917621	0.683793	1.22485	3.58333	5
138	10_CA_0465-sil	LPS_2d	48	26	183	589	1360	148	6	38	39	6.5	267	3.178	8.172	27.24	14	351	15	0.169907	0.253687	0.00847577	0.775194	1.21957	3.50193	5
139	10_CA_0466-sil	LPS_2d	73	33	288	959	2529	207	7	78	83	11.857	450	3.632	19.976	39.952	16	859	21	0.142727	0.214771	0.00487225	0.739793	1.24468	5.05345	4
140	10_CA_0467-sil	LPS_2d	56	28	231	732	1814	177	8	66	60	7.5	361	3.632	5.902	37.682	12	572	19	0.158507	0.242388	0.00677093	0.727132	1.27911	4.40549	6
141	10_CA_0468-sil	LPS_2d	44	27	161	558	1456	164	5	41	46	9.2	260	3.632	14.074	42.676	9	554	21	0.140423	0.288278	0.00792511	0.679128	1.21976	3.58013	5
142	10_CA_0469-sil	LPS_2d	54	27	221	594	1038	142	9	52	55	6.111	291	4.086	9.08	29.056	15	453	16	0.264987	0.244722	0.0102467	0.645736	1.28209	2.71966	6
143	10_CA_0470-sil	LPS_2d	60	29	431	954	2443	193	5	125	102	20.4	558	4.086	20.884	45.854	16	1156	20	0.200846	0.204564	0.00689868	0.820643	1.27737	3.03618	1
144	10_CA_0471-sil	LPS_2d	86	36	228	620	1157	143	11	67	58	5.273	326	4.086	9.08	29.51	15	472	16	0.272026	0.233013	0.0104714	0.708894	1.27925	2.48472	6
145	10_CA_0473-sil	LPS_2d	42	24	169	534	1354	153	4	37	38	9.5	250	3.632	12.258	30.418	13	386	16	0.156097	0.288833	0.00944053	0.724956	1.20904	3.89266	5
146	11_CA_0503-sil	LPS_2d	102	43	346	1124	2395	201	11	116	107	9.727	567	3.178	17.252	42.676	18	699	19	0.187009	0.180339	0.00452423	0.743965	1.28121	3.23715	4
147	11_CA_0505-sil	LPS_2d	41	24	195	724	1472	157	5	57	59	11.8	326	3.178	12.258	38.59	14	450	18	0.160656	0.216048	0.00562115	0.749577	1.23673	3.37453	3
148	11_CA_0506-sil	LPS_2d	56	28	200	755	1293	146	6	76	62	10.333	355	3.632	13.62	28.602	15	469	15	0.19815	0.191551	0.00552863	0.760282	1.28421	2.37885	6
149	11_CA_0507-sil	LPS_2d	44	24	392	1606	2853	213	9	163	111	12.333	743	3.632	23.608	45.854	18	1269	22	0.15285	0.133749	0.00215419	0.787515	1.31026	3.18849	1
150	11_CA_0508-sil	LPS_2d	35	22	225	849	2176	202	5	61	58	11.6	385	2.27	7.264	49.94	13	587	19	0.119581	0.238696	0.00454626	0.66696	1.23863	6.04771	3
151	11_CA_0509-sil	LPS_2d	75	35	323	1165	2496	201	11	105	109	9.909	540	3.632	23.154	36.774	17	780	19	0.159753	0.173555	0.00373128	0.775485	1.27484	3.65466	4
152	11_CA_0510-sil	LPS_2d	75	37	328	966	2585	200	12	60	65	5.417	442	2.724	20.43	41.768	14	804	21	0.155837	0.209216	0.00553744	0.812145	1.2472	3.93557	4
153	11_CA_0513-sil	LPS_2d	51	26	176	601	1784	174	5	43	40	8	276	4.086	17.706	33.142	12	410	17	0.126863	0.293419	0.0080793	0.739515	1.19436	4.7319	5
154	11_CA_0514-sil	LPS_2d	50	26	284	742	2107	189	8	69	71	8.875	384	3.632	5.902	37.682	13	783	18	0.158467	0.258137	0.00781938	0.740555	1.27221	4.34725	6
155	11_CA_0515-sil	LPS_2d	57	28	401	1032	3081	221	7	90	81	11.571	540	4.086	25.424	45.854	15	958	23	0.148656	0.213877	0.00538767	0.79207	1.25099	3.85595	1
156	11_CA_0516-sil	LPS_2d	54	28	410	1097	3286	224	5	91	84	16.8	559	3.632	12.712	45.4	16	951	25	0.141489	0.204432	0.00486344	0.822542	1.26642	3.74205	1
157	11_CA_0517-sil	LPS_2d	46	27	260	855	1448	155	5	85	75	15	425	3.178	17.706	39.044	13	747	21	0.211793	0.17833	0.00509692	0.756907	1.3273	2.35343	3
158	11_CA_0518-sil	LPS_2d	40	25	359	1377	3216	232	6	113	99	16.5	624	2.724	20.43	44.038	20	1062	23	0.124062	0.169511	0.00267401	0.74952	1.26258	4.25211	1
159	11_CA_0520-sil	LPS_2d	46	27	350	1246	2375	197	10	115	92	9.2	586	2.724	8.626	36.774	17	1000	19	0.166775	0.159573	0.0032511	0.765238	1.3127	3.09272	1
160	11_CA_0521-sil	LPS_2d	57	29	177	658	1228	146	10	63	66	6.6	306	3.632	13.166	30.418	15	459	15	0.190537	0.227771	0.007163	0.724533	1.27305	3.30623	6
161	11_CA_0522-sil	LPS_2d	53	27	139	472	1240	146	6	51	48	8	235	4.086	14.982	32.688	10	453	17	0.155445	0.312683	0.0111894	0.736247	1.21529	3.38603	5
162	11_CA_0523-sil	LPS_2d	45	26	257	869	1960	185	7	64	64	9.143	405	3.178	16.344	44.038	14	759	19	0.154282	0.212604	0.00504405	0.723238	1.25065	3.65099	3
163	12_CA_0555-sil	LPS_2d	75	36	287	707	1258	163	8	63	59	7.375	369	3.178	9.988	40.86	13	602	19	0.2877	0.232542	0.00930837	0.598198	1.27194	2.89551	6
164	12_CA_0556-sil	LPS_2d	55	27	238	904	2317	199	6	62	63	10.5	402	3.632	25.424	36.32	14	871	20	0.126564	0.22063	0.00452863	0.734806	1.22544	5.31626	2
165	12_CA_0557-sil	LPS_2d	61	30	239	773	1917	186	10	60	64	6.4	365	3.632	14.528	37.682	13	519	17	0.156727	0.243097	0.00645374	0.696885	1.22981	4.55029	5
166	12_CA_0558-sil	LPS_2d	52	28	424	1087	2024	179	10	141	104	10.4	626	3.632	10.442	34.504	19	784	17	0.235251	0.166207	0.00518062	0.797075	1.3586	2.35126	1
167	12_CA_0559-sil	LPS_2d	44	25	221	891	1800	172	6	65	62	10.333	390	3.632	9.988	34.504	14	731	18	0.147366	0.19307	0.00419824	0.764026	1.27478	3.49873	3
168	12_CA_0560-sil	LPS_2d	77	36	290	835	1990	182	9	64	62	6.889	407	3.178	14.074	36.774	15	603	18	0.184551	0.220511	0.00677093	0.754388	1.26393	3.20925	4
169	12_CA_0561-sil	LPS_2d	59	29	314	1132	2409	195	6	113	92	15.333	558	3.632	21.338	43.584	20	1071	21	0.154921	0.17107	0.00359471	0.792524	1.30371	2.64242	1
170	12_CA_0562-sil	LPS_2d	64	30	253	736	1740	180	8	68	64	8	369	3.632	7.264	35.866	15	512	16	0.181899	0.250079	0.00767401	0.674749	1.25835	3.46757	6
171	12_CA_0563-sil	LPS_2d	55	28	195	500	1512	156	7	45	45	6.429	257	4.086	9.08	32.234	13	381	15	0.165612	0.319128	0.0131013	0.776819	1.20438	2.84294	5
172	12_CA_0564-sil	LPS_2d	57	28	232	756	1394	156	6	75	76	12.667	375	4.086	13.166	34.504	19	435	15	0.20778	0.206432	0.00637445	0.720163	1.29356	3.06949	6
173	12_CA_0565-sil	LPS_2d	90	35	274	929	1770	169	11	82	82	7.455	445	4.994	9.08	37.228	19	743	18	0.2057	0.184093	0.00544934	0.781824	1.28781	2.63573	4
174	12_CA_0566-sil	LPS_2d	71	31	273	951	2275	185	10	77	75	7.5	438	4.086	18.16	36.774	19	702	18	0.151159	0.197718	0.00494714	0.837493	1.24589	3.49149	4
175	12_CA_0567-sil	LPS_2d	60	29	342	1301	2360	197	10	104	96	9.6	591	4.086	14.982	46.308	21	960	21	0.170379	0.152132	0.00301762	0.76563	1.32142	3.64775	1
176	12_CA_0568-sil	LPS_2d	57	28	260	859	2040	183	9	94	82	9.111	428	4.086	10.442	35.412	19	408	18	0.155608	0.219797	0.00575771	0.765877	1.27916	4.45064	4
177	12_CA_0570-sil	LPS_2d	50	27	303	990	2047	182	7	80	80	11.429	465	3.178	15.436	39.044	15	981	21	0.172458	0.184079	0.00455947	0.780018	1.28731	3.51961	4
178	12_CA_0571-sil	LPS_2d	52	28	211	684	1266	150	10	76	65	6.5	348	3.178	9.534	28.602	17	418	15	0.207855	0.221811	0.00722907	0.706806	1.30447	2.63911	6
179	12_CA_0572-sil	LPS_2d	50	27	232	916	1890	176	6	74	72	12	409	3.632	15.436	31.326	13	609	18	0.149489	0.1943	0.00430837	0.763313	1.24469	3.76421	3
180	12_CA_0573-sil	LPS_2d	69	32	375	1265	2829	226	7	109	99	14.143	602	4.086	24.97	47.67	18	1136	24	0.15693	0.178238	0.00346696	0.695485	1.2843	4.84984	1
181	12_CA_0574-sil	LPS_2d	45	26	244	772	1820	171	6	60	63	10.5	371	3.178	9.534	35.412	16	388	17	0.159229	0.222648	0.00617621	0.782648	1.2537	3.0572	3
182	13_CA_0605-sil	BG_3h	45	26	166	782	1493	160	6	55	52	8.667	328	3.178	14.074	35.866	14	416	17	0.141084	0.204815	0.00432599	0.730709	1.23149	3.44075	3
183	13_CA_0606-sil	BG_3h	61	32	148	800	1700	172	4	52	47	11.75	324	4.54	14.528	43.584	12	425	18	0.122537	0.20807	0.00382819	0.721441	1.20609	4.52225	5
184	13_CA_0607-sil	BG_3h	58	29	177	770	2298	193	5	34	35	7	312	4.54	23.154	37.682	13	613	23	0.10196	0.245388	0.0047489	0.773833	1.19623	6.1568	5
185	13_CA_0608-sil	BG_3h	44	25	236	779	2475	198	5	46	48	9.6	349	4.086	10.442	38.59	12	800	21	0.113093	0.252533	0.00571366	0.79211	1.20431	5.68053	2
186	13_CA_0609-sil	BG_3h	51	27	149	651	1579	162	7	27	30	4.286	269	3.632	16.344	29.964	12	261	16	0.126564	0.241881	0.00557709	0.753185	1.2069	3.94153	5
187	13_CA_0610-sil	BG_3h	65	30	228	865	1870	173	6	65	64	10.667	396	4.086	13.62	33.596	18	612	18	0.156344	0.201432	0.00500881	0.789577	1.26093	3.7998	4
188	13_CA_0611-sil	BG_3h	54	30	181	878	2292	192	5	65	51	10.2	367	2.27	21.792	41.314	12	1033	24	0.102542	0.218524	0.00381498	0.77911	1.21183	5.78963	2
189	13_CA_0612-sil	BG_3h	53	27	278	1250	2123	179	6	94	79	13.167	531	4.54	17.706	33.142	20	561	20	0.155515	0.14348	0.0026696	0.833767	1.29614	3.25178	1
190	13_CA_0613-sil	BG_3h	70	34	203	960	1687	163	12	56	63	5.25	381	3.178	17.252	34.05	18	501	16	0.1617	0.171075	0.00377533	0.798216	1.26611	3.5008	4
191	13_CA_0614-sil	BG_3h	65	30	219	1142	2294	206	4	76	69	17.25	447	4.086	14.074	44.038	16	805	23	0.123987	0.177608	0.00264758	0.677093	1.26039	4.05618	2
192	13_CA_0616-sil	BG_3h	60	29	209	942	2065	187	7	58	59	8.429	387	4.086	10.442	40.406	16	720	17	0.130176	0.197696	0.00377533	0.741868	1.22546	4.17543	2
193	13_CA_0617-sil	BG_3h	38	22	266	1022	2033	180	5	63	69	13.8	450	3.178	15.89	40.406	20	774	21	0.149304	0.173846	0.00357709	0.792467	1.27974	2.69764	1
194	13_CA_0618-sil	BG_3h	62	31	215	884	2305	198	6	56	56	9.333	368	3.632	17.706	36.32	13	612	21	0.12052	0.222251	0.00439207	0.737546	1.24571	4.83935	2
195	13_CA_0619-sil	BG_3h	47	26	186	928	1719	165	5	44	45	9	365	3.178	21.792	30.418	17	589	18	0.135357	0.176485	0.0033348	0.790899	1.25448	3.89809	3
196	13_CA_0620-sil	BG_3h	39	24	194	940	1379	152	5	67	57	11.4	394	3.178	10.896	39.044	18	584	18	0.169251	0.161648	0.00330396	0.747185	1.3025	2.67431	3
197	13_CA_0622-sil	BG_3h	45	25	171	816	1860	171	7	42	47	6.714	325	3.632	13.166	33.142	15	468	19	0.115802	0.210172	0.00410132	0.80211	1.22021	4.29802	3
198	13_CA_0623-sil	BG_3h	61	31	273	1360	2925	215	7	93	91	13	563	3.178	24.516	43.584	18	946	22	0.114062	0.15704	0.00224229	0.797119	1.26961	4.21336	1
199	13_CA_0624-sil	BG_3h	55	29	274	1099	2455	199	5	76	74	14.8	488	3.632	22.7	34.958	22	1009	21	0.134128	0.178921	0.00335242	0.780273	1.25588	3.42761	1
200	14_CA_0660-sil	BG_3h	53	28	241	1275	2695	207	5	87	74	14.8	522	3.632	14.982	41.768	14	704	23	0.109137	0.159837	0.00219824	0.788458	1.23911	4.01729	1
201	14_CA_0661-sil	BG_3h	42	25	209	949	1882	178	9	67	66	7.333	401	3.632	12.712	33.596	14	666	18	0.133445	0.18726	0.00351101	0.750564	1.2544	4.49675	3
202	14_CA_0662-sil	BG_3h	46	26	187	854	2283	186	7	50	51	7.286	346	3.632	17.706	38.59	13	712	19	0.10207	0.216286	0.00397357	0.832026	1.21351	4.99189	3
203	14_CA_0663-sil	BG_3h	46	25	209	908	1962	185	7	62	58	8.286	382	3.178	12.258	46.308	16	867	19	0.13	0.203242	0.00386784	0.72022	1.25563	4.61416	3
204	14_CA_0664-sil	BG_3h	49	28	240	1059	2602	212	8	67	74	9.25	442	3.178	25.424	44.038	12	802	22	0.111291	0.199916	0.00322026	0.724194	1.24679	5.54084	2
205	14_CA_0665-sil	BG_3h	53	30	252	1204	2428	198	6	82	77	12.833	503	3.632	16.344	39.952	15	1042	22	0.125555	0.161119	0.00254185	0.780476	1.2798	4.25598	1
206	14_CA_0666-sil	BG_3h	47	26	202	863	1637	164	5	47	45	9	353	3.632	11.804	33.596	15	415	19	0.151731	0.187273	0.00408811	0.767921	1.27049	2.92552	3
207	14_CA_0667-sil	BG_3h	37	22	205	903	1716	169	5	65	59	11.8	395	3.178	15.436	33.142	17	455	16	0.141326	0.186498	0.00372687	0.75815	1.29547	3.96099	3
208	14_CA_0669-sil	BG_3h	43	25	285	1202	2632	214	5	73	69	13.8	504	3.632	16.344	47.216	17	1123	24	0.124674	0.177101	0.00282819	0.723436	1.25406	4.01771	1
209	14_CA_0670-sil	BG_3h	61	35	207	869	1779	167	8	55	61	7.625	361	3.178	17.706	30.872	16	573	17	0.150714	0.190833	0.00438326	0.798678	1.25663	3.64824	4
210	14_CA_0671-sil	BG_3h	50	28	230	1128	2411	209	5	68	68	13.6	459	3.632	15.436	46.762	18	677	20	0.116216	0.182216	0.00267841	0.694595	1.26264	5.37435	2
211	14_CA_0672-sil	BG_3h	52	26	224	953	2201	188	7	60	54	7.714	399	4.086	19.976	36.774	16	647	19	0.125498	0.198564	0.00386344	0.780965	1.24828	4.46692	2
212	14_CA_0673-sil	BG_3h	39	24	226	960	2082	178	5	52	49	9.8	399	3.178	15.436	35.412	14	538	20	0.127053	0.184322	0.00357269	0.82807	1.27593	4.12487	3
213	14_CA_0674-sil	BG_3h	51	29	241	1038	2274	193	9	67	59	6.556	440	3.178	16.798	40.86	15	658	17	0.128128	0.183802	0.00331278	0.765833	1.28511	5.17255	2
214	14_CA_0675-sil	BG_3h	38	23	205	822	1761	178	8	48	51	6.375	344	3.178	13.62	34.05	17	425	17	0.13793	0.217692	0.00455507	0.697097	1.24025	4.18388	3
215	15_CA_0711-sil	BG_3h	58	29	210	774	1552	171	7	56	55	7.857	347	4.086	12.712	39.498	17	463	16	0.172198	0.221634	0.00563436	0.665943	1.26695	3.80148	6
216	15_CA_0713-sil	BG_3h	72	32	323	1353	2995	225	10	92	78	7.8	581	4.086	16.344	42.676	24	918	21	0.131859	0.164533	0.00266079	0.745313	1.26781	4.1401	4
217	15_CA_0714-sil	BG_3h	53	28	212	833	1609	157	4	69	65	16.25	375	4.086	21.792	34.504	17	541	17	0.165273	0.184758	0.00463436	0.821674	1.27761	2.42995	3
218	15_CA_0716-sil	BG_3h	71	32	283	1075	2456	205	10	77	76	7.6	479	4.086	7.718	47.67	16	732	19	0.144229	0.188163	0.0037489	0.734388	1.28004	4.31515	4
219	15_CA_0717-sil	BG_3h	41	24	377	1556	3757	249	6	96	90	15	676	3.178	30.872	55.842	17	1635	28	0.11141	0.158793	0.00214097	0.762665	1.25752	5.03492	1
220	15_CA_0718-sil	BG_3h	54	28	293	1355	2183	191	7	102	85	12.143	583	3.632	24.062	35.412	20	957	19	0.158974	0.139744	0.00234361	0.754498	1.33026	2.87255	1
221	15_CA_0719-sil	BG_3h	56	28	222	1089	2438	192	7	58	59	8.429	445	4.086	16.344	40.406	14	773	20	0.114278	0.173947	0.00288546	0.834687	1.26034	4.76369	2
222	15_CA_0720-sil	BG_3h	61	30	279	1081	1994	174	5	90	79	15.8	487	4.54	15.89	38.59	21	573	19	0.170515	0.159665	0.0035859	0.824643	1.27974	2.75199	1
223	15_CA_0721-sil	BG_3h	51	27	214	789	2182	192	5	61	48	9.6	358	3.632	8.172	40.86	13	610	19	0.121361	0.240797	0.00525991	0.747154	1.23874	5.22605	3
224	15_CA_0723-sil	BG_3h	65	35	222	846	1784	174	5	74	66	13.2	397	3.178	13.166	38.59	17	629	19	0.160692	0.200207	0.00476211	0.739493	1.25962	3.61548	4
225	15_CA_0724-sil	BG_3h	66	30	323	1124	2301	187	6	102	86	14.333	546	4.086	23.608	34.958	22	826	21	0.168696	0.164502	0.00378414	0.828458	1.29342	2.93981	1
226	15_CA_0725-sil	BG_3h	66	31	221	863	2428	209	5	68	59	11.8	403	4.54	14.982	44.038	17	674	21	0.118101	0.238612	0.00468282	0.696432	1.23189	5.02855	2
227	15_CA_0726-sil	BG_3h	43	26	201	798	1892	174	4	49	51	12.75	335	4.086	20.43	31.78	13	697	20	0.129242	0.214207	0.00466079	0.786291	1.23341	4.95416	3
228	15_CA_0727-sil	BG_3h	33	21	167	748	1578	173	6	39	43	7.167	307	2.724	16.798	44.038	12	664	17	0.126894	0.227718	0.00433921	0.659132	1.23563	4.18632	3
229	15_CA_0728-sil	BG_3h	41	24	300	1138	2384	192	5	72	73	14.6	500	3.178	14.074	34.504	22	809	20	0.143022	0.168189	0.00327753	0.810515	1.29044	3.66349	1
230	15_CA_0729-sil	BG_3h	51	27	286	893	1897	175	6	77	64	10.667	437	3.632	24.062	37.228	16	607	19	0.177374	0.194141	0.00522907	0.782189	1.26432	3.57726	3
231	16_CA_0760-sil	BG_1d	52	28	165	715	1836	183	4	41	44	11	294	4.54	22.246	37.682	13	381	18	0.1183	0.255238	0.0053348	0.692493	1.24955	6.27626	5
232	16_CA_0761-sil	BG_1d	27	19	138	765	1497	156	5	38	43	8.6	299	2.724	12.712	29.51	14	366	16	0.11015	0.202233	0.00347577	0.771247	1.23619	4.90195	3
233	16_CA_0762-sil	BG_1d	45	26	202	1027	2305	197	6	58	51	8.5	418	3.632	17.252	37.682	15	575	20	0.106863	0.188612	0.002837	0.74622	1.24144	4.92123	2
234	16_CA_0763-sil	BG_1d	48	29	133	596	1369	157	4	39	35	8.75	253	3.178	11.804	33.596	12	479	17	0.13233	0.254705	0.00601762	0.701088	1.18995	4.90822	5
235	16_CA_0764-sil	BG_1d	49	27	129	602	1216	144	4	38	39	9.75	254	4.086	16.798	32.234	15	422	18	0.146132	0.233062	0.00587225	0.739982	1.22562	4.08992	5
236	16_CA_0765-sil	BG_1d	52	32	212	946	1837	168	5	49	49	9.8	384	3.632	19.976	36.774	18	451	19	0.143758	0.177374	0.00370044	0.81826	1.26561	3.64234	3
237	16_CA_0766-sil	BG_1d	39	24	140	684	1465	159	5	36	41	8.2	264	3.178	14.528	34.05	12	294	16	0.122617	0.233432	0.00485463	0.726824	1.22106	4.69043	5
238	16_CA_0768-sil	BG_1d	36	23	195	960	1620	162	5	67	64	12.8	390	3.178	16.798	29.964	19	488	15	0.142727	0.167295	0.00311013	0.779128	1.27494	3.55611	3
239	16_CA_0769-sil	BG_1d	39	23	211	1036	2159	187	7	51	51	7.286	405	3.178	17.706	34.958	16	616	18	0.115947	0.179907	0.00292511	0.779388	1.24209	4.69812	3
240	16_CA_0770-sil	BG_1d	41	24	225	798	1685	160	5	50	54	10.8	352	3.632	21.792	32.688	15	424	18	0.157833	0.202877	0.00537004	0.826581	1.26911	2.89912	3
241	16_CA_0771-sil	BG_1d	49	26	222	950	1849	186	8	59	61	7.625	392	3.632	14.074	40.86	17	746	18	0.146194	0.197405	0.00381057	0.668996	1.24137	4.55426	3
242	16_CA_0773-sil	BG_1d	34	22	186	741	1752	168	5	49	48	9.6	326	3.178	15.89	34.05	13	497	18	0.125352	0.227441	0.00504405	0.778132	1.27095	4.74515	3
243	16_CA_0775-sil	BG_1d	47	26	250	827	1712	167	6	82	84	14	416	3.178	15.89	34.504	18	808	18	0.1733	0.202308	0.00546696	0.770643	1.30077	3.47754	3
244	16_CA_0776-sil	BG_1d	40	24	191	727	1730	181	6	52	47	7.833	322	3.178	12.712	36.32	14	562	18	0.133322	0.25126	0.00559031	0.664018	1.21279	4.82231	3
245	16_CA_0779-sil	BG_1d	37	22	239	946	2075	189	4	58	63	15.75	400	3.632	25.878	37.682	15	759	22	0.133163	0.199233	0.00384581	0.727617	1.25337	4.38722	2
246	17_CA_0809-sil	BG_1d	44	25	314	1340	2982	229	8	73	73	9.125	555	3.178	13.166	49.94	17	905	22	0.119938	0.171132	0.00250661	0.714225	1.2784	4.86784	1
247	17_CA_0810-sil	BG_1d	60	28	377	1616	3506	240	6	98	91	15.167	668	4.086	15.89	59.474	17	1920	31	0.124551	0.148414	0.00210132	0.76533	1.28712	4.56431	1
248	17_CA_0811-sil	BG_1d	45	25	192	934	2155	195	7	57	57	8.143	384	3.632	9.988	44.946	12	660	20	0.109899	0.209031	0.00340529	0.709075	1.23849	5.5331	2
249	17_CA_0812-sil	BG_1d	54	28	231	902	2303	190	6	70	65	10.833	403	3.632	14.074	40.86	14	534	19	0.123471	0.209934	0.00436123	0.801784	1.24594	3.91999	2
250	17_CA_0814-sil	BG_1d	48	26	287	1175	2423	214	6	77	66	11	503	3.632	14.528	58.112	13	1216	28	0.138489	0.181696	0.00304846	0.667216	1.2772	3.64576	1
251	17_CA_0815-sil	BG_1d	70	33	261	1022	1928	176	8	79	67	8.375	468	3.632	23.154	37.682	20	991	20	0.171441	0.170661	0.00389868	0.780621	1.27875	3.3065	4
252	17_CA_0816-sil	BG_1d	56	29	301	988	2424	197	9	75	74	8.222	471	3.178	11.804	45.4	12	1034	23	0.147559	0.199357	0.00460352	0.784683	1.26856	4.60382	4
253	17_CA_0817-sil	BG_1d	66	35	272	897	2756	212	4	68	69	17.25	427	3.632	28.602	37.228	16	763	23	0.122542	0.230238	0.00502643	0.773639	1.21719	5.40987	2
254	17_CA_0818-sil	BG_1d	71	33	320	1191	2685	202	6	106	96	16	550	4.086	24.062	42.676	21	1029	21	0.145586	0.16904	0.00344053	0.826753	1.26397	3.49375	1
255	17_CA_0819-sil	BG_1d	40	23	247	861	1478	158	6	68	59	9.833	401	3.178	14.528	31.78	21	410	16	0.193996	0.184537	0.00490308	0.742018	1.30477	2.84358	3
256	17_CA_0820-sil	BG_1d	63	33	250	980	2412	208	6	51	55	9.167	411	4.54	18.614	44.038	18	582	21	0.129665	0.210586	0.00403965	0.702524	1.25894	4.76888	4
257	17_CA_0821-sil	BG_1d	50	28	238	879	2094	188	2	57	53	26.5	393	4.994	15.436	48.124	21	730	19	0.137493	0.21093	0.00453304	0.741106	1.24896	3.70779	2
258	17_CA_0823-sil	BG_1d	58	28	213	624	1874	176	5	57	56	11.2	322	3.632	7.264	34.504	14	489	17	0.144718	0.286137	0.00899119	0.758916	1.22829	4.36245	5
259	17_CA_0824-sil	BG_1d	65	33	194	771	1494	153	7	60	62	8.857	341	3.178	7.264	30.418	15	495	16	0.173555	0.198996	0.00551101	0.801877	1.28066	3.00447	6
260	17_CA_0825-sil	BG_1d	94	41	282	985	2908	221	9	79	67	7.444	462	3.632	10.442	43.584	15	961	22	0.129498	0.223445	0.0048326	0.747537	1.26157	5.39214	4
261	17_CA_0826-sil	BG_1d	61	30	292	1088	2368	194	6	75	75	12.5	486	3.632	14.528	37.682	20	674	19	0.149088	0.17878	0.0037533	0.788093	1.28268	3.58349	1
262	17_CA_0827-sil	BG_1d	64	32	249	859	2196	184	8	70	70	8.75	406	3.632	21.338	35.412	15	607	20	0.142736	0.213044	0.00528634	0.816115	1.24815	3.86368	4
263	18_CA_0859-sil	BG_1d	41	24	256	976	2468	202	6	54	56	9.333	420	3.178	15.436	40.86	16	656	22	0.120542	0.20815	0.00397797	0.761626	1.24534	4.51907	2
264	18_CA_0860-sil	BG_1d	37	22	211	1024	2386	192	3	66	59	19.667	423	3.178	14.528	37.228	21	590	20	0.103894	0.187031	0.00293833	0.809057	1.24334	5.04652	2
265	18_CA_0861-sil	BG_1d	53	28	212	943	2216	197	4	63	65	16.25	404	4.086	12.258	44.492	19	706	20	0.119639	0.207687	0.00368282	0.713969	1.23466	4.452	2
266	18_CA_0863-sil	BG_1d	65	33	262	965	2060	179	6	66	72	12	429	4.086	22.7	36.32	18	516	19	0.15859	0.182617	0.00425551	0.804943	1.30442	3.68444	4
267	18_CA_0865-sil	BG_1d	52	29	249	936	2057	196	6	78	69	11.5	434	2.724	10.896	45.854	16	683	20	0.146568	0.20774	0.0042511	0.67189	1.28881	4.56764	6
268	18_CA_0866-sil	BG_1d	55	28	273	924	1882	175	4	78	76	19	438	3.632	11.35	37.228	17	715	20	0.174097	0.187075	0.00471806	0.774264	1.28685	2.67542	3
269	18_CA_0869-sil	BG_1d	41	24	310	1283	2926	215	5	97	89	17.8	565	3.178	24.062	43.13	17	999	24	0.12007	0.166229	0.00262996	0.792423	1.25371	4.05458	1
270	18_CA_0870-sil	BG_1d	45	25	222	842	1631	161	7	62	53	7.571	389	3.178	18.614	30.872	21	534	16	0.163859	0.189247	0.00461674	0.787035	1.30109	3.22703	3
271	18_CA_0871-sil	BG_1d	46	25	307	1115	2106	190	5	84	74	14.8	509	3.632	12.258	37.228	18	871	18	0.167467	0.169326	0.00351101	0.731207	1.2887	3.31329	1
272	18_CA_0873-sil	BG_1d	33	21	198	854	1507	158	5	58	54	10.8	356	3.178	13.62	33.596	17	430	17	0.153859	0.186295	0.00404846	0.758551	1.27785	3.34114	3
273	18_CA_0874-sil	BG_1d	46	25	181	800	1861	173	4	58	50	12.5	338	3.632	11.804	33.596	13	509	19	0.122022	0.214568	0.00437885	0.779753	1.22379	3.99998	3
274	19_CA_0903-sil	BG_2d	46	25	276	1204	2494	197	6	72	68	11.333	500	3.632	17.706	42.676	17	738	21	0.128978	0.162815	0.00276652	0.809176	1.26725	3.09255	1
275	19_CA_0904-sil	BG_2d	57	29	178	690	2057	179	5	37	34	6.8	290	4.54	9.988	31.78	13	390	21	0.114269	0.255339	0.00600441	0.805736	1.21659	4.95922	5
276	19_CA_0905-sil	BG_2d	49	26	180	683	1272	142	5	53	46	9.2	314	3.632	13.166	29.964	16	372	16	0.179731	0.205709	0.006	0.78893	1.25302	3.1324	6
277	19_CA_0906-sil	BG_2d	46	26	242	1051	2526	200	4	73	67	16.75	456	3.178	17.706	40.86	16	573	21	0.113709	0.189057	0.00322467	0.793784	1.23982	3.79359	2
278	19_CA_0907-sil	BG_2d	46	25	143	673	1650	160	5	35	39	7.8	265	3.632	8.172	32.234	12	336	18	0.114185	0.232467	0.00498238	0.807454	1.21532	4.7907	5
279	19_CA_0908-sil	BG_2d	67	30	344	1440	2581	205	8	97	93	11.625	618	4.086	13.166	38.136	19	938	22	0.159493	0.142026	0.00248458	0.771943	1.29623	2.38362	1
280	19_CA_0909-sil	BG_2d	41	24	280	965	2217	189	5	59	60	12	439	3.178	17.252	35.412	16	538	22	0.144449	0.194634	0.00425551	0.777463	1.25956	3.24847	3
281	19_CA_0910-sil	BG_2d	59	31	246	817	2073	179	4	42	46	11.5	356	4.086	23.608	38.136	14	731	20	0.147233	0.216996	0.00562996	0.812216	1.22146	3.96269	2
282	19_CA_0911-sil	BG_2d	65	35	238	929	1772	175	8	66	65	8.125	408	2.724	15.89	38.136	19	633	21	0.170863	0.187335	0.00434802	0.724991	1.2994	3.42796	4
283	19_CA_0912-sil	BG_2d	60	29	218	950	1894	189	5	62	61	12.2	407	4.086	11.35	39.498	17	719	20	0.146925	0.194771	0.00370044	0.663894	1.26142	4.1963	2
284	19_CA_0913-sil	BG_2d	47	26	179	791	1613	161	5	44	47	9.4	322	3.632	19.068	29.964	15	423	19	0.140198	0.203445	0.00454185	0.782436	1.2575	3.45875	3
285	19_CA_0914-sil	BG_2d	58	32	176	686	2031	188	5	31	30	6	286	3.632	19.068	43.584	11	344	20	0.115396	0.267938	0.00597357	0.720824	1.21653	6.04009	5
286	19_CA_0915-sil	BG_2d	53	28	170	621	1677	170	6	30	34	5.667	265	3.632	11.804	36.32	10	394	20	0.133115	0.26926	0.00705286	0.730753	1.21811	4.25091	5
287	19_CA_0918-sil	BG_2d	60	30	242	1029	2494	205	7	59	61	8.714	439	3.632	18.614	42.676	17	599	21	0.121181	0.196952	0.0034978	0.744233	1.25564	5.23778	2
288	19_CA_0919-sil	BG_2d	50	27	154	599	1341	147	3	42	40	13.333	275	3.632	9.534	29.056	13	374	17	0.152661	0.238233	0.0067489	0.778846	1.22434	4.08639	5
289	19_CA_0920-sil	BG_2d	47	26	218	820	1879	182	7	47	52	7.429	354	3.632	13.62	41.768	12	595	20	0.14096	0.220753	0.00489427	0.712264	1.24949	4.32674	3
290	19_CA_0921-sil	BG_2d	41	25	202	834	1846	166	5	56	55	11	363	3.632	17.252	35.866	13	563	18	0.131573	0.196718	0.00429075	0.842555	1.21279	3.4268	3
291	20_CA_0952-sil	BG_2d	46	27	274	1122	2412	193	7	78	74	10.571	487	3.178	10.442	35.412	15	663	19	0.132524	0.171634	0.003163	0.810291	1.29284	3.93626	1
292	20_CA_0953-sil	BG_2d	41	23	236	995	1641	160	6	61	65	10.833	407	3.178	20.43	29.51	19	590	16	0.168626	0.163921	0.00363877	0.80304	1.30353	2.61365	3
293	20_CA_0954-sil	BG_2d	47	25	233	958	1731	173	7	61	56	8	407	3.632	14.074	30.872	17	626	17	0.161802	0.179414	0.00380617	0.730661	1.27179	3.68975	3
294	20_CA_0955-sil	BG_2d	70	35	298	1272	2419	202	8	76	81	10.125	541	3.632	16.798	46.762	16	1207	25	0.152154	0.157097	0.00280176	0.746348	1.2874	4.28059	4
295	20_CA_0956-sil	BG_2d	48	26	232	923	2254	202	3	61	52	17.333	400	4.086	18.16	49.486	12	1004	24	0.124167	0.215586	0.00402203	0.697031	1.24417	4.15118	2
296	20_CA_0957-sil	BG_2d	46	27	209	936	2159	189	5	62	61	12.2	392	3.632	14.982	36.32	14	693	20	0.118238	0.199427	0.00356828	0.758938	1.23613	4.1551	2
297	20_CA_0958-sil	BG_2d	42	25	329	1596	2421	204	8	123	108	13.5	692	2.724	15.436	38.59	23	873	19	0.153137	0.126269	0.00179295	0.7337	1.352	3.85571	1
298	20_CA_0959-sil	BG_2d	48	27	253	1316	2154	185	6	78	73	12.167	521	3.178	19.976	35.866	22	848	19	0.139511	0.139035	0.00212775	0.78893	1.27469	3.03878	1
299	20_CA_0960-sil	BG_2d	55	29	326	1412	3217	227	6	80	84	14	590	3.178	15.89	48.578	20	1018	23	0.118357	0.158388	0.00233921	0.787678	1.26247	3.6589	1
300	20_CA_0961-sil	BG_2d	62	32	257	1203	2070	183	5	78	77	15.4	501	3.632	19.068	40.86	15	805	22	0.154048	0.149498	0.00268722	0.781022	1.27642	3.39538	1
301	20_CA_0962-sil	BG_2d	68	32	319	1358	2813	218	7	87	87	12.429	574	4.086	23.608	48.578	21	899	21	0.137463	0.159256	0.00259471	0.744357	1.28775	3.95194	1
302	20_CA_0963-sil	BG_2d	47	26	338	1112	2179	191	6	98	83	13.833	542	3.178	16.344	37.228	20	732	19	0.176718	0.170661	0.00387665	0.753216	1.31479	2.7408	1
303	20_CA_0964-sil	BG_2d	57	29	209	1055	2123	187	6	57	59	9.833	423	3.632	16.344	34.504	16	640	20	0.125093	0.173639	0.00288987	0.766273	1.24863	4.51991	2
304	20_CA_0965-sil	BG_2d	53	28	232	1149	2257	204	6	68	72	12	461	3.632	18.16	43.584	16	946	23	0.126401	0.175815	0.00265639	0.67959	1.24765	5.08906	2
305	20_CA_0966-sil	BG_2d	52	27	273	1277	2292	190	5	80	76	15.2	531	4.086	13.166	35.866	20	867	21	0.141881	0.147097	0.00244493	0.795846	1.26252	3.24167	1
306	20_CA_0967-sil	BG_2d	64	32	267	1032	2414	200	6	76	72	12	461	3.178	25.424	37.682	22	807	21	0.137313	0.19267	0.00385022	0.755075	1.26532	4.10749	1
307	21_CA_0999-sil	BG_2d	49	27	192	961	1603	170	5	73	62	12.4	393	4.086	9.988	36.774	15	563	18	0.150564	0.174899	0.00322907	0.700731	1.30208	3.46078	3
308	21_CA_1000-sil	BG_2d	36	23	214	912	1622	163	5	68	65	13	396	3.178	12.712	41.768	17	511	18	0.153868	0.177952	0.00371806	0.762974	1.29009	3.24527	3
309	21_CA_1001-sil	BG_2d	48	27	188	853	2517	204	5	46	50	10	360	3.632	10.442	43.13	11	628	23	0.0934097	0.234648	0.0039163	0.761242	1.20277	6.85072	2
310	21_CA_1003-sil	BG_2d	54	29	233	1074	2567	206	5	72	66	13.2	458	4.994	11.35	43.584	15	865	21	0.11193	0.19	0.00306608	0.759167	1.24714	4.36293	2
311	21_CA_1004-sil	BG_2d	47	27	135	633	1416	151	4	48	45	11.25	270	4.086	16.344	29.51	16	350	15	0.128736	0.232467	0.00546256	0.785454	1.23461	4.04124	5
312	21_CA_1006-sil	BG_2d	53	29	147	656	1487	158	7	36	40	5.714	269	3.178	14.074	30.872	16	399	16	0.134141	0.237022	0.00567401	0.752934	1.22002	3.30981	5
313	21_CA_1007-sil	BG_2d	45	26	155	750	1344	155	6	41	44	7.333	301	3.632	12.712	33.596	16	305	17	0.148718	0.204789	0.00437004	0.700762	1.26884	3.77343	3
314	21_CA_1008-sil	BG_2d	47	25	187	876	1756	171	8	51	55	6.875	357	3.632	14.982	34.05	15	458	18	0.133414	0.194722	0.00381938	0.755344	1.26206	4.57057	3
315	22_CA_1013-sil	BG_1d	53	29	261	1061	2315	204	6	70	66	11	457	4.086	20.43	42.676	16	1040	22	0.135894	0.190396	0.00343172	0.696846	1.26274	4.41014	2
316	22_CA_1014-sil	BG_1d	47	26	251	899	2094	180	7	49	51	7.286	390	3.632	17.252	34.504	17	563	20	0.142159	0.198401	0.00454185	0.811934	1.26286	3.56647	3
317	22_CA_1017-sil	BG_1d	55	28	266	926	2339	189	6	72	65	10.833	432	4.086	10.896	33.596	16	643	21	0.137559	0.20426	0.00470485	0.820084	1.25696	4.51703	2
318	22_CA_1018-sil	BG_1d	48	26	268	1262	2665	209	6	88	85	14.167	529	3.632	10.896	44.492	17	906	21	0.11841	0.164286	0.00245374	0.767731	1.28554	4.07247	1
319	22_CA_1019-sil	BG_1d	46	27	209	982	2139	194	5	58	54	10.8	399	3.178	11.35	40.86	15	624	21	0.119383	0.195423	0.00325991	0.7153	1.2282	4.52026	2
320	22_CA_1020-sil	BG_1d	57	29	295	1176	2675	215	7	94	78	11.143	527	4.086	11.804	45.4	16	1004	22	0.131705	0.182026	0.0031674	0.725974	1.25527	4.40402	1
321	22_CA_1021-sil	BG_1d	44	25	231	888	1716	166	5	72	70	14	406	3.178	14.528	30.418	18	502	16	0.160471	0.184859	0.00430837	0.7853	1.27457	3.09205	3
322	22_CA_1022-sil	BG_1d	45	25	230	1028	1919	175	5	68	73	14.6	429	3.632	20.43	34.05	19	618	18	0.143203	0.169044	0.00322026	0.787269	1.25605	3.68353	3
323	23_CA_1024-sil	BG_2d	65	32	344	1175	2246	188	4	96	88	22	554	4.994	23.608	44.492	18	896	23	0.182256	0.156758	0.00357709	0.798925	1.30021	3.3875	1
324	23_CA_1025-sil	BG_2d	58	32	248	878	2028	196	6	64	60	10	407	3.178	16.798	44.038	15	844	21	0.151229	0.220326	0.00485463	0.661115	1.27499	3.34487	6
325	23_CA_1026-sil	BG_2d	44	25	214	1010	1810	165	5	64	67	13.4	413	3.178	13.62	32.234	20	503	17	0.142476	0.160441	0.00307048	0.837366	1.28785	3.17275	3
326	23_CA_1028-sil	BG_2d	59	30	299	1199	2408	192	7	92	90	12.857	534	3.632	19.522	34.504	18	770	19	0.148537	0.15885	0.00307048	0.818643	1.29594	3.63419	1
327	23_CA_1032-sil	BG_2d	45	25	210	936	1759	168	5	72	72	14.4	401	3.632	12.258	33.142	13	809	19	0.145035	0.179053	0.00362115	0.779	1.26344	2.72364	3
328	23_CA_1034-sil	BG_2d	46	26	221	998	1942	185	6	64	58	9.667	412	3.178	14.528	37.682	14	559	18	0.137533	0.183705	0.00331718	0.714727	1.25989	4.07845	3
329	23_CA_1036-sil	BG_2d	96	39	319	1221	2722	206	7	86	82	11.714	544	4.086	19.068	36.774	22	984	20	0.15259	0.16815	0.00348018	0.80696	1.28682	3.51742	4

## Sheet: acute_hippo_comparison
Statistical comparison between experimental groups in acute design, hippocampus region
parameter	PBS-LPS_3h	PBS-LPS_1d	PBS-LPS_2d	PBS-BG_3h	PBS-BG_1d	PBS-BG_2d	LPS_3h-BG_3h	LPS_1d-BG_1d	LPS_2d-BG_2d
soma area	0.5435	0.6268	0.2354	0.5911	0.3613	0.6597	0.9922	0.2625	0.1229
soma perimeter	0.6443	0.6649	0.3856	0.3587	0.3131	0.5343	0.1561	0.2403	0.168
branch area	0.0002	0.1162	0.0525	0.6509	0.5727	0.7743	0.0707	0.2789	0.3311
branch perimeter	0.0142	0.6886	0.5983	0.0588	0.2925	0.3456	0	0.2496	0.2445
branch index	0.2996	0.6701	0.9098	0.5948	0.7934	0.9564	0.0489	0.8151	0.9723
convex area	0.0303	0.8984	0.4202	0.3399	0.6992	0.896	0	0.6675	0.3914
convex perimeter	0.0001	0.8992	0.3046	0.7953	0.9554	0.7344	0.0001	0.868	0.49
startnodes	0.8763	0.0001	0	0.0316	0.7285	0.3756	0.1674	0.0438	0
junctions	0.0605	0.1559	0.1051	0.4975	0.5134	0.7133	0.0344	0.3157	0.3494
endnodes	0.0082	0.1229	0.0788	0.3052	0.3233	0.4862	0.02	0.4024	0.4614
end-to-startnode ratio	0.0549	0.9787	0.2091	0.6158	0.4681	0.6845	0.1393	0.4457	0.17
total branch length	0.016	0.4757	0.6069	0.2213	0.429	0.5135	0.0061	0.9368	0.8064
Sholl min radius	0.4026	0.3732	0.6288	0.6674	0.4107	0.6689	0.5599	0.8462	0.8125
Sholl peak radius	0.885	0.7872	0.2692	0.3464	0.8951	0.8505	0.1273	0.5864	0.1781
Sholl max radius	0.0408	0.9655	0.4293	0.9217	0.926	0.4528	0.0285	0.9718	0.8442
Sholl peak	0.0053	0.3059	0.6351	0.1403	0.0793	0.2465	0.0145	0.5608	0.4249
cell spread	0.364	0.3537	0.1246	0.7295	0.8804	0.9227	0.33	0.4958	0.1303
cell solidity	0.6212	0	0.0137	0.5771	0.9756	0.6171	0.3479	0	0.0104
cell convexity	0.0029	0.3215	0.6288	0.0005	0.1267	0.1568	0	0.0464	0.1268
cell circularity	0.0663	0.028	0.0995	0.0424	0.1908	0.2034	0.0081	0.0039	0.0288
convex circularity	0.7854	0.9421	0.726	0.1211	0.1747	0.118	0.0252	0.0802	0.0506
fractal dimension	0.0042	0.2336	0.1999	0.7446	0.454	0.411	0.0553	0.454	0.9329
lacunarity	0.5151	0.0013	0	0.4156	0.5101	0.0152	0.8613	0.004	0.0256
*Significance is determined by type II Wald chi-square tests for linear mixed models
p > 0.05
0.01 < p < 0.05	*
0.001 < p < 0.01	**
p < 0.001	***
